# Supplementary material for: Safe focused ultrasound-mediated blood-brain barrier opening is driven primarily by transient reorganization of tight junctions
Source: bioRxiv preprint, doi:10.1101/2025.01.28.635258, version 1 (2025-01-31)
Supplement: Table 2 [file 635258_file10.xlsx]

## Sheet: Sheet1
Dataset S1 - Differentially expressed genes for capillaries 1 hour after exposure to 450 & 750 kPa FUS.
	p_val	avg_log2FC	pct.1	pct.2	p_val_adj
Atf3	0	1.23292	0.799	0.415	0
Ubc	0	0.769043	0.992	0.963	0
Apold1	0	1.64965	0.96	0.604	0
Sgk1	0	1.58952	0.918	0.573	0
Tpt1	0	0.529343	1	0.998	0
Cdc42ep3	0	1.55911	0.914	0.573	0
Maff	1.32e-307	1.12932	0.596	0.202	2.37e-303
Malat1	2.51e-305	-0.7439	0.999	1	4.49e-301
Sox18	2.73e-276	-1.00436	0.361	0.698	4.89e-272
Nr4a1	9.86e-276	1.04758	0.768	0.418	1.77e-271
Csrnp1	2.58e-268	0.975208	0.493	0.133	4.63e-264
Srsf5	5.03e-258	0.778625	0.884	0.668	9.01e-254
Foxf1	3.95e-245	1.0282	0.541	0.196	7.08e-241
Ccn1	2.57e-231	1.19737	0.698	0.37	4.61e-227
Gm42418	1.91e-209	0.598834	1	1	3.42e-205
Rps14	3.57e-205	0.429772	0.995	0.983	6.39e-201
Dusp1	5.92e-196	0.644103	0.985	0.908	1.06e-191
Rasd1	1.08e-191	1.21877	0.54	0.245	1.94e-187
Clec2d	9.37e-191	-0.77786	0.645	0.844	1.68e-186
Tmcc3	3.13e-184	1.03751	0.622	0.354	5.61e-180
Rsrp1	7.49e-184	-0.72107	0.563	0.794	1.34e-179
Eif1	1.49e-180	0.367983	0.999	0.998	2.67e-176
Gimap6	9.62e-175	0.676736	0.85	0.659	1.72e-170
Actb	1.78e-170	0.420184	0.999	0.999	3.19e-166
Cttnbp2nl	5.87e-162	0.71308	0.696	0.431	1.05e-157
Nfkbia	1.9e-160	0.475477	0.993	0.982	3.41e-156
mt-Atp6	1.27e-157	0.350377	1	0.999	2.28e-153
Akap12	7.25e-154	0.90717	0.86	0.737	1.3e-149
Btg2	1.39e-153	0.596156	0.971	0.884	2.49e-149
Pakap.1	2.57e-149	0.560972	0.938	0.856	4.6e-145
Rpl17	1.89e-148	0.406124	0.989	0.954	3.4e-144
Rpl13a	2.13e-148	0.433806	0.975	0.929	3.81e-144
Ccnl1	1.82e-146	0.732521	0.643	0.395	3.26e-142
Hmcn1	1.14e-143	-0.6078	0.831	0.923	2.04e-139
Cdkn1a	1.86e-142	0.537493	0.975	0.907	3.33e-138
Arid5a	4.2e-142	0.733104	0.308	0.084	7.52e-138
Plaur	1.5e-140	0.793348	0.309	0.085	2.69e-136
Pdgfb	1.84e-140	-0.65778	0.511	0.723	3.3e-136
Kdm6b	5.34e-139	0.738397	0.372	0.133	9.56e-135
Adamts1	4.65e-138	0.886708	0.675	0.437	8.33e-134
Ctla2a	1.35e-136	0.651879	0.974	0.939	2.42e-132
Rps12	8.2e-135	0.369573	0.992	0.978	1.47e-130
mt-Co3	4.26e-131	0.31986	0.997	0.995	7.64e-127
mt-Cytb	2.43e-128	0.309684	0.999	0.998	4.36e-124
Mcl1	2.45e-127	0.534698	0.891	0.771	4.4e-123
Sik1	1.29e-126	0.645017	0.714	0.51	2.31e-122
Per1	8.33e-124	0.629388	0.43	0.193	1.49e-119
Actg1	3.51e-120	0.45798	0.993	0.986	6.29e-116
Hes1	3.15e-117	0.647645	0.886	0.742	5.65e-113
Slc2a1	5.23e-116	0.335397	0.998	0.989	9.38e-112
Rps6	4.12e-114	0.420332	0.944	0.854	7.38e-110
mt-Co2	3.87e-113	0.278344	0.999	0.999	6.94e-109
Klf9	3.54e-112	0.511521	0.872	0.733	6.35e-108
Rplp1	3.66e-112	0.293309	0.998	0.993	6.56e-108
Id1	3.1e-109	0.512562	0.974	0.936	5.56e-105
Ddx5	6.56e-109	0.354503	0.986	0.963	1.18e-104
Timp3	2.53e-107	0.565436	0.894	0.8	4.53e-103
Mafk	1.14e-105	0.5589	0.324	0.121	2.04e-101
Dusp6	2.77e-104	0.609383	0.654	0.439	4.97e-100
mt-Nd1	3.39e-104	0.368485	0.982	0.948	6.08e-100
Grasp	1.03e-103	0.571151	0.768	0.591	1.84e-99
Ifrd1	4.39e-103	0.679446	0.454	0.242	7.86e-99
Lpar6	9.87e-102	-0.68453	0.187	0.383	1.77e-97
Dusp8	1.12e-100	0.54507	0.287	0.098	2e-96
Rpl35	7.26e-99	-0.39283	0.857	0.942	1.3e-94
Rps15	2.2e-98	0.388799	0.945	0.858	3.95e-94
Rpl26	2.25e-98	0.291246	0.993	0.989	4.03e-94
Clic4	1.09e-96	0.467958	0.894	0.8	1.95e-92
Sat1	1.06e-95	0.755089	0.68	0.5	1.9e-91
Gm26532	3.43e-95	0.702895	0.563	0.348	6.15e-91
Rpl12	8.28e-94	0.416834	0.897	0.772	1.48e-89
Fermt2	3.41e-92	0.375652	0.96	0.935	6.11e-88
Tnfrsf12a	5.46e-92	0.620147	0.383	0.186	9.79e-88
Rps29	1.65e-91	-0.2351	0.998	1	2.95e-87
mt-Nd2	7.88e-90	0.300938	0.993	0.987	1.41e-85
Grrp1	3.83e-89	-0.5557	0.393	0.573	6.86e-85
Dlc1	7.49e-89	0.500253	0.725	0.544	1.34e-84
Cbx3	1.18e-87	-0.51425	0.619	0.751	2.12e-83
Rps23	5.95e-87	0.265629	0.996	0.99	1.07e-82
Plat	3.97e-86	0.520867	0.835	0.696	7.11e-82
Tcim	2.5e-84	0.721872	0.44	0.244	4.47e-80
Snu13	6.85e-83	0.499832	0.716	0.555	1.23e-78
Rgcc	7.21e-82	0.576425	0.889	0.821	1.29e-77
Fosl2	1.89e-80	0.514013	0.303	0.129	3.38e-76
Nmt1	2.36e-80	-0.46381	0.495	0.666	4.24e-76
Ddx50	3.49e-79	0.459299	0.723	0.567	6.26e-75
Eef1a1	1.89e-78	0.251426	0.999	0.994	3.38e-74
Skil	4.26e-78	0.520045	0.599	0.408	7.64e-74
Cxcl12	6.14e-73	-0.40411	0.986	0.992	1.1e-68
Crip2	7.86e-73	-0.35658	0.883	0.931	1.41e-68
Apoe	4.71e-72	0.390259	0.958	0.904	8.43e-68
Ppp1r15a	1.02e-71	0.486933	0.565	0.375	1.83e-67
Rpl5	1.13e-71	0.343313	0.885	0.777	2.03e-67
AY036118	2.22e-71	0.293948	0.933	0.83	3.97e-67
Prpf4b	9.04e-69	-0.47894	0.502	0.654	1.62e-64
Mt1	1.45e-68	0.622198	0.924	0.85	2.59e-64
Egr3	3.37e-68	0.42288	0.147	0.033	6.05e-64
Noct	4.51e-68	0.488758	0.276	0.124	8.08e-64
Yrdc	1.83e-66	0.42146	0.293	0.135	3.28e-62
Dynll1	3.25e-66	-0.32815	0.909	0.946	5.83e-62
Axin2	5.77e-65	-0.48617	0.196	0.348	1.03e-60
Klf7	1.19e-64	0.413732	0.788	0.658	2.13e-60
Nr4a2	1.33e-64	0.47261	0.275	0.123	2.39e-60
Mat2a	2.14e-64	0.467278	0.609	0.441	3.84e-60
Kctd12	6.74e-64	0.553491	0.578	0.431	1.21e-59
Klf4	8.88e-64	0.384418	0.959	0.912	1.59e-59
Gm17056	6.61e-63	0.394465	0.152	0.039	1.18e-58
H3f3b	1.02e-62	0.250522	0.997	0.996	1.83e-58
Litaf	4.34e-62	0.371292	0.156	0.043	7.77e-58
Bach1	5.64e-62	0.482315	0.427	0.261	1.01e-57
Gimap5	6.37e-62	0.461995	0.351	0.19	1.14e-57
Rack1	1.31e-61	0.306892	0.897	0.804	2.35e-57
Spry1	1.2e-60	0.461596	0.506	0.341	2.16e-56
Slc7a5	2.78e-60	-0.35999	0.868	0.907	4.99e-56
Pmp22	1.18e-59	0.48517	0.394	0.232	2.11e-55
Cebpb	3.76e-59	0.545117	0.239	0.104	6.73e-55
Enc1	5.63e-59	-0.45802	0.156	0.294	1.01e-54
Osgin1	9.51e-59	0.359224	0.128	0.028	1.7e-54
Rapgef4	1e-58	-0.40269	0.695	0.792	1.8e-54
Sertad1	2.23e-57	0.44855	0.472	0.308	4e-53
4430402I18Rik	2.84e-56	0.462487	0.417	0.256	5.09e-52
Bhlhe40	3.64e-56	0.418928	0.532	0.366	6.53e-52
Rps25	4.69e-56	0.248436	0.973	0.947	8.4e-52
Rpl38	6.19e-56	-0.1851	0.999	0.999	1.11e-51
Rassf1	6.34e-56	0.434937	0.533	0.376	1.14e-51
AI467606	1.35e-55	-0.31073	0.06	0.165	2.42e-51
Purb	2.56e-55	0.370635	0.761	0.653	4.58e-51
Rps18	7.52e-55	0.224569	0.988	0.976	1.35e-50
Plk3	1.29e-54	0.359524	0.201	0.08	2.32e-50
Ankrd37	6.8e-54	-0.48561	0.093	0.207	1.22e-49
Coq10b	2.28e-53	0.412631	0.396	0.238	4.08e-49
Atf4	1.14e-52	0.404714	0.572	0.418	2.04e-48
Ciart	1.6e-52	0.301048	0.124	0.031	2.88e-48
Socs3	4.76e-52	0.466225	0.349	0.201	8.52e-48
Ap2b1	5.49e-52	-0.39185	0.472	0.605	9.84e-48
Rpl27a	8.86e-52	0.180595	0.999	0.997	1.59e-47
Luc7l3	1.02e-51	-0.42779	0.222	0.36	1.82e-47
Rsrc2	1.98e-51	-0.38684	0.512	0.644	3.54e-47
Slc9a3r2	3.03e-51	-0.32369	0.898	0.935	5.43e-47
Rhoc	4.2e-51	0.416335	0.672	0.55	7.52e-47
Srarp	1.11e-50	-0.41531	0.47	0.601	2e-46
Rps9	1.54e-50	0.223019	0.988	0.974	2.75e-46
Ppia	1.55e-50	-0.21504	0.994	0.995	2.78e-46
Ost4	1.75e-50	-0.37332	0.585	0.693	3.13e-46
Wsb1	1.98e-50	0.398569	0.33	0.187	3.55e-46
Rps16	2.9e-50	0.19496	0.997	0.996	5.2e-46
Egr1	3.27e-50	0.467326	0.491	0.324	5.87e-46
Ppp1r2	3.29e-50	0.361214	0.8	0.702	5.89e-46
Lars2	1.25e-49	0.302339	0.937	0.891	2.25e-45
Slc25a25	2.33e-49	0.306256	0.166	0.06	4.17e-45
Atp5k	3.8e-48	-0.34788	0.586	0.702	6.82e-44
Slc25a5	5.82e-48	0.382979	0.728	0.611	1.04e-43
Rbm3	4.57e-47	0.342946	0.749	0.635	8.18e-43
Junb	7.02e-47	0.311209	0.94	0.863	1.26e-42
Trib1	4.09e-46	0.350623	0.19	0.08	7.34e-42
mt-Atp8	4.76e-46	-0.36337	0.575	0.689	8.54e-42
Rpl7	3.17e-45	0.217958	0.981	0.964	5.67e-41
Zfp36	8e-45	0.289904	0.855	0.73	1.43e-40
Ube2d3	1.01e-44	0.326702	0.734	0.615	1.82e-40
Dync1i2	1.14e-44	-0.36334	0.719	0.798	2.04e-40
Xist	6.06e-44	0.469336	0.374	0.232	1.09e-39
Asb4	7.05e-44	0.507295	0.239	0.124	1.26e-39
Rps28	1.23e-43	-0.23692	0.958	0.978	2.21e-39
St13	1.99e-43	-0.36476	0.499	0.613	3.57e-39
Jmjd6	2.06e-43	0.367048	0.338	0.205	3.68e-39
Ndrg1	2.48e-43	0.334054	0.9	0.848	4.45e-39
AC149090.1	5.28e-43	-0.43072	0.329	0.456	9.47e-39
Nck1	8.3e-43	-0.37245	0.293	0.422	1.49e-38
Smad6	1.23e-42	0.318665	0.239	0.121	2.2e-38
Myl6	5.15e-42	0.203961	0.994	0.99	9.22e-38
Rpl23	9.18e-42	0.181956	0.995	0.995	1.65e-37
Tiparp	9.54e-42	0.39512	0.218	0.108	1.71e-37
Trim47	3.05e-41	-0.36787	0.223	0.346	5.46e-37
Mecom	3.13e-41	-0.3203	0.641	0.745	5.6e-37
Nes	7.1e-41	0.381418	0.698	0.59	1.27e-36
Arpc3	1.2e-40	0.244626	0.929	0.885	2.15e-36
Tob1	1.2e-40	0.382145	0.588	0.463	2.15e-36
Rpl28	1.62e-40	0.186921	0.991	0.989	2.89e-36
Ccng2	1.62e-40	0.328196	0.234	0.12	2.9e-36
Rgs12	3.01e-40	0.345316	0.727	0.631	5.39e-36
Tomm7	3.43e-40	-0.27139	0.784	0.84	6.15e-36
Pdxk	7.26e-40	0.36429	0.515	0.377	1.3e-35
Hspa1b	1.41e-39	-0.5259	0.384	0.51	2.53e-35
Zic2	1.45e-39	-0.37862	0.343	0.463	2.6e-35
Ier3	2.7e-39	-0.51334	0.455	0.577	4.83e-35
B3gnt2	4.46e-39	-0.36171	0.563	0.665	8e-35
Tmem252	4.98e-39	0.556895	0.541	0.42	8.93e-35
Lrrc8a	8.42e-39	0.374372	0.461	0.329	1.51e-34
Fzd4	9.01e-39	0.326571	0.613	0.481	1.61e-34
Rap1b	1.71e-38	0.304556	0.733	0.636	3.06e-34
Ddx3x	2.08e-38	0.353109	0.567	0.441	3.73e-34
Slc25a33	2.11e-38	0.340367	0.27	0.152	3.78e-34
Hbb-bs	7.21e-38	-1.98708	0.008	0.053	1.29e-33
Ftl1	1.63e-37	0.229051	0.973	0.949	2.93e-33
Son	2.22e-37	-0.23363	0.916	0.952	3.97e-33
Brd9	3.96e-37	-0.32031	0.343	0.465	7.1e-33
Cox4i1	5.36e-37	0.230684	0.919	0.863	9.61e-33
Epha2	1.17e-36	0.246245	0.119	0.041	2.1e-32
Lrif1	2.36e-36	-0.30312	0.068	0.149	4.22e-32
Ndufb1-ps	3.47e-36	-0.28014	0.605	0.712	6.21e-32
Rps19	4.49e-36	0.170407	0.994	0.99	8.04e-32
Crybb3	5.44e-36	0.217488	0.089	0.023	9.74e-32
Wwc2	7.04e-36	0.31273	0.655	0.546	1.26e-31
mt-Nd4l	7.11e-36	-0.29646	0.665	0.757	1.27e-31
Nfkbiz	7.24e-36	0.291218	0.18	0.085	1.3e-31
Myl12a	7.98e-36	0.251827	0.924	0.888	1.43e-31
Ptprr	8.89e-36	0.440842	0.576	0.462	1.59e-31
Tsc22d3	1.32e-35	0.355196	0.843	0.787	2.37e-31
Kitl	2.37e-35	-0.28148	0.847	0.899	4.24e-31
Sh2d3c	6.9e-35	0.348154	0.39	0.265	1.24e-30
Zyx	7.33e-35	0.308337	0.21	0.11	1.31e-30
Bcar1	7.71e-35	0.290503	0.202	0.104	1.38e-30
S1pr1	7.86e-35	0.246548	0.971	0.958	1.41e-30
4921524J17Rik	8.67e-35	-0.32455	0.272	0.389	1.55e-30
Iigp1	2.52e-34	-0.37726	0.165	0.27	4.52e-30
Mapk6	3.33e-34	0.267803	0.192	0.095	5.97e-30
Ppp1cb	5.24e-34	0.312463	0.65	0.543	9.39e-30
Col4a3bp	6.2e-34	-0.3116	0.678	0.75	1.11e-29
Prickle1	8.87e-34	-0.33	0.188	0.293	1.59e-29
Nfkbil1	1.3e-33	0.300487	0.193	0.099	2.33e-29
Nudcd3	1.47e-33	-0.31686	0.363	0.478	2.63e-29
Rnf138	1.67e-33	0.294524	0.257	0.148	2.99e-29
Midn	1.84e-33	0.304929	0.387	0.263	3.3e-29
Tmsb10	2.27e-33	-0.43657	0.904	0.895	4.06e-29
Arid5b	2.8e-33	-0.32118	0.574	0.675	5.03e-29
Itih5	2.94e-33	0.272767	0.893	0.833	5.26e-29
Hbegf	5e-33	0.423792	0.375	0.261	8.97e-29
Pabpn1	8.14e-33	0.281478	0.648	0.529	1.46e-28
Smad1	8.41e-33	0.32478	0.375	0.256	1.51e-28
Rps13	9.04e-33	0.180614	0.986	0.972	1.62e-28
Knop1	9.94e-33	-0.36002	0.261	0.37	1.78e-28
Snrnp27	2.68e-32	-0.31163	0.357	0.473	4.81e-28
Sec61g	5.73e-32	-0.28221	0.678	0.753	1.03e-27
Tek	6.05e-32	-0.26375	0.801	0.849	1.08e-27
Plpp6	1.36e-31	0.312938	0.565	0.451	2.44e-27
Pnrc1	1.46e-31	0.275332	0.793	0.715	2.61e-27
Adamts9	1.62e-31	0.235036	0.099	0.033	2.91e-27
Kank3	2.5e-31	-0.26407	0.761	0.816	4.49e-27
Sema4c	2.69e-31	0.286766	0.235	0.134	4.82e-27
Tpm4	2.92e-31	0.23054	0.857	0.788	5.24e-27
Zfp36l1	3.07e-31	-0.25439	0.817	0.868	5.5e-27
Tra2b	5.6e-31	0.323116	0.666	0.567	1e-26
Rpl4	6.07e-31	0.247422	0.809	0.724	1.09e-26
Irgm2	6.19e-31	-0.20847	0.044	0.108	1.11e-26
Rnf125	1.49e-30	0.302692	0.505	0.387	2.68e-26
Cox7a2l	2.34e-30	0.269256	0.721	0.623	4.19e-26
Msantd4	2.85e-30	-0.28672	0.123	0.211	5.1e-26
Shld1	3.96e-30	0.377702	0.39	0.279	7.09e-26
Eif4a1	4.96e-30	0.303541	0.607	0.496	8.88e-26
Eno1	7.44e-30	-0.31077	0.308	0.418	1.33e-25
Arglu1	9.12e-30	-0.31214	0.552	0.643	1.63e-25
Pwwp3a	9.58e-30	-0.2971	0.177	0.274	1.72e-25
Mindy1	1.41e-29	-0.31374	0.459	0.559	2.53e-25
Tmco1	3.21e-29	-0.2826	0.599	0.676	5.75e-25
Rabgef1	3.68e-29	0.229526	0.131	0.057	6.59e-25
Wwtr1	4.53e-29	0.265586	0.691	0.587	8.12e-25
Plk2	5.24e-29	0.221266	0.742	0.633	9.39e-25
Zfp322a	6.84e-29	-0.24276	0.06	0.128	1.23e-24
Slc38a2	1.13e-28	0.246491	0.894	0.84	2.02e-24
Bcl6b	1.74e-28	0.292614	0.199	0.111	3.12e-24
Cnot3	2.85e-28	-0.28547	0.231	0.333	5.11e-24
Inka1	3.26e-28	-0.22886	0.067	0.138	5.85e-24
Tnfrsf10b	6.27e-28	0.195455	0.106	0.041	1.12e-23
Slfn2	1.26e-27	-0.29123	0.073	0.143	2.26e-23
Rpl23a	1.31e-27	0.210075	0.858	0.791	2.35e-23
Ing2	1.6e-27	0.292909	0.292	0.191	2.87e-23
Bsg	1.78e-27	-0.1085	1	1	3.18e-23
Ifnar1	2.19e-27	-0.31777	0.441	0.531	3.93e-23
Mt2	2.34e-27	0.479494	0.588	0.494	4.2e-23
Fam110a	2.87e-27	0.272972	0.226	0.134	5.14e-23
Ap2a2	3.02e-27	-0.30417	0.301	0.4	5.42e-23
Rassf9	3.9e-27	-0.29883	0.277	0.377	6.99e-23
Hsp90b1	3.93e-27	-0.25505	0.772	0.83	7.05e-23
Gem	4.01e-27	0.242818	0.086	0.029	7.19e-23
Krtap28-13	4.8e-27	-0.19499	0.012	0.051	8.61e-23
Rpl13	5.46e-27	0.136064	1	0.998	9.79e-23
Irf1	5.87e-27	-0.26563	0.133	0.218	1.05e-22
Btbd3	6.18e-27	-0.24611	0.093	0.169	1.11e-22
Picalm	1.17e-26	0.277764	0.604	0.505	2.1e-22
Cdk5rap1	1.25e-26	-0.14676	0.014	0.054	2.23e-22
Srgn	1.36e-26	0.1879	0.956	0.935	2.43e-22
Cbx1	3.48e-26	-0.28843	0.461	0.558	6.24e-22
Ppp1r10	4.9e-26	0.28103	0.372	0.267	8.78e-22
Gch1	5.6e-26	0.302338	0.497	0.398	1e-21
Slc40a1	5.95e-26	-0.30332	0.557	0.636	1.07e-21
Alas1	7.82e-26	0.2877	0.716	0.624	1.4e-21
Rpl41	8.41e-26	-0.1156	0.999	0.999	1.51e-21
Ptp4a2	1.09e-25	0.26404	0.604	0.501	1.95e-21
Tuba1b	1.43e-25	-0.25215	0.69	0.75	2.56e-21
Dip2b	1.78e-25	-0.29395	0.299	0.395	3.19e-21
Rpl32	2.88e-25	0.145581	0.993	0.987	5.16e-21
Ramp2	2.9e-25	-0.20264	0.958	0.967	5.2e-21
Map3k8	3.61e-25	-0.27601	0.146	0.229	6.47e-21
Dusp7	3.77e-25	-0.27952	0.24	0.333	6.76e-21
Snrk	3.93e-25	0.211344	0.785	0.696	7.04e-21
Ncbp2	4.92e-25	-0.22364	0.071	0.137	8.82e-21
Zic3	5.91e-25	-0.29499	0.269	0.365	1.06e-20
Rps3	6.02e-25	0.151609	0.979	0.972	1.08e-20
Bcl10	8.28e-25	0.264395	0.449	0.338	1.48e-20
Crnkl1	8.36e-25	-0.23707	0.106	0.182	1.5e-20
Aplp2	9.75e-25	0.193564	0.901	0.852	1.75e-20
Stk38	1.17e-24	-0.30649	0.386	0.474	2.09e-20
Nr1d1	1.22e-24	-0.21652	0.051	0.109	2.19e-20
Gm2000	1.62e-24	-0.25905	0.21	0.302	2.91e-20
Etf1	1.7e-24	0.24602	0.281	0.185	3.05e-20
1810026B05Rik	1.97e-24	-0.27609	0.377	0.47	3.54e-20
Pde4b	2.16e-24	0.251189	0.242	0.15	3.87e-20
Saraf	2.39e-24	0.259844	0.645	0.548	4.28e-20
Ctla2b	2.6e-24	0.302238	0.492	0.388	4.67e-20
Id2	3.68e-24	0.316601	0.346	0.246	6.6e-20
Arhgap31	4.12e-24	-0.18401	0.814	0.853	7.39e-20
Rps3a1	4.85e-24	0.157042	0.991	0.986	8.68e-20
Ppp1r18	5.35e-24	0.246137	0.209	0.126	9.58e-20
Gpr146	6.64e-24	0.264021	0.59	0.491	1.19e-19
Zfp329	8.33e-24	-0.22714	0.095	0.167	1.49e-19
Nrarp	1.02e-23	0.20979	0.123	0.058	1.83e-19
Susd6	1.08e-23	-0.28147	0.29	0.381	1.93e-19
Prkab1	1.12e-23	0.252758	0.227	0.142	2.01e-19
Triap1	1.79e-23	-0.21975	0.121	0.199	3.22e-19
Rpl14	3.78e-23	0.173104	0.935	0.91	6.78e-19
Ube2s	3.98e-23	0.244103	0.538	0.435	7.14e-19
Flt1	4.36e-23	0.114531	1	1	7.81e-19
Arl6ip1	5.7e-23	-0.23364	0.613	0.686	1.02e-18
Ktn1	7.91e-23	-0.24474	0.627	0.695	1.42e-18
Il10rb	8.56e-23	-0.24487	0.569	0.646	1.53e-18
Ndufa3	1.46e-22	-0.24439	0.542	0.619	2.62e-18
Rpl18a	1.57e-22	0.135515	0.993	0.994	2.81e-18
Irgm1	1.99e-22	-0.23578	0.081	0.145	3.56e-18
Zfand2a	2.23e-22	0.22481	0.157	0.086	4e-18
Dusp11	3.21e-22	-0.2621	0.577	0.655	5.75e-18
Coa4	3.26e-22	-0.08124	0.007	0.036	5.83e-18
Rplp0	4.21e-22	0.160842	0.954	0.935	7.54e-18
Rps4x	4.79e-22	0.137444	0.989	0.988	8.59e-18
Spsb1	5.97e-22	0.205294	0.121	0.059	1.07e-17
Zranb2	7.43e-22	-0.27268	0.274	0.363	1.33e-17
Lsm7	7.52e-22	-0.26362	0.158	0.234	1.35e-17
Rasip1	8.94e-22	0.202573	0.744	0.656	1.6e-17
Ube2b	9.22e-22	0.218157	0.692	0.599	1.65e-17
Eef2	9.24e-22	0.193456	0.8	0.742	1.65e-17
Wee1	9.7e-22	0.166849	0.097	0.042	1.74e-17
Eif3j1	1.3e-21	-0.24954	0.328	0.419	2.32e-17
Ezh1	1.57e-21	-0.2585	0.255	0.343	2.81e-17
Thra	1.73e-21	-0.26487	0.436	0.522	3.1e-17
Degs2	1.94e-21	-0.27789	0.455	0.535	3.47e-17
Ly6a	2.49e-21	-0.17298	0.99	0.995	4.47e-17
Abcg2	2.75e-21	-0.1712	0.972	0.974	4.92e-17
Cd83	2.86e-21	-0.21364	0.07	0.129	5.13e-17
Tmem258	2.96e-21	-0.25405	0.283	0.367	5.3e-17
Nedd9	3.62e-21	0.212045	0.324	0.227	6.49e-17
Ywhab	3.89e-21	-0.23325	0.67	0.732	6.97e-17
Pglyrp1	4.12e-21	0.200353	0.971	0.959	7.38e-17
Slc6a6	4.64e-21	-0.20846	0.899	0.938	8.32e-17
Ngrn	4.73e-21	-0.20695	0.082	0.144	8.48e-17
Prdm16	4.75e-21	-0.28262	0.165	0.242	8.51e-17
Col4a1	5.03e-21	-0.23116	0.722	0.772	9.01e-17
Gm11808	5.06e-21	-0.24721	0.346	0.431	9.07e-17
Mrpl18	5.6e-21	-0.23398	0.189	0.27	1e-16
Zfp84	6.24e-21	-0.16764	0.042	0.091	1.12e-16
Hnrnpf	1.07e-20	0.207472	0.839	0.781	1.92e-16
Apod	1.47e-20	0.268601	0.308	0.22	2.63e-16
Rbp1	2.13e-20	0.262978	0.29	0.203	3.81e-16
Lmcd1	2.54e-20	0.222115	0.162	0.094	4.56e-16
Atp6v0c	2.66e-20	0.208115	0.776	0.699	4.76e-16
Errfi1	3.02e-20	0.219652	0.18	0.107	5.41e-16
Gm9889	3.15e-20	0.17195	0.104	0.048	5.65e-16
Mitd1	3.43e-20	-0.25837	0.15	0.225	6.14e-16
Lrrn3	3.57e-20	-0.36137	0.4	0.473	6.39e-16
Gadd45g	3.59e-20	0.302129	0.377	0.285	6.44e-16
Ism1	4.14e-20	0.219791	0.192	0.118	7.43e-16
Txnip	5.54e-20	0.371547	0.685	0.632	9.92e-16
Bsdc1	6.31e-20	0.219419	0.26	0.177	1.13e-15
Ccny	7.4e-20	0.238282	0.603	0.507	1.33e-15
Zbtb2	1.3e-19	0.179235	0.123	0.064	2.33e-15
Etaa1	1.3e-19	-0.14102	0.029	0.07	2.34e-15
Rel	1.32e-19	0.185488	0.138	0.075	2.37e-15
Tsc22d2	1.66e-19	0.22522	0.26	0.178	2.98e-15
Dnajb9	1.76e-19	0.233945	0.368	0.276	3.16e-15
Ssna1	1.98e-19	-0.24303	0.199	0.274	3.56e-15
Nrbf2	2.02e-19	-0.18434	0.078	0.138	3.61e-15
Kif23	2.05e-19	0.171676	0.119	0.061	3.67e-15
Sash1	3.19e-19	0.230063	0.694	0.615	5.73e-15
Cavin3	3.49e-19	-0.27167	0.281	0.36	6.25e-15
Golph3l	4.46e-19	-0.18147	0.077	0.136	7.99e-15
Polr3k	4.75e-19	-0.21122	0.091	0.152	8.52e-15
Mef2d	5.53e-19	0.206366	0.287	0.203	9.91e-15
Clic5	6.06e-19	-0.21907	0.757	0.79	1.09e-14
Tmed5	6.24e-19	0.243558	0.528	0.436	1.12e-14
Lsmem1	7.88e-19	0.093809	0.029	0.003	1.41e-14
D8Ertd738e	8.48e-19	0.212149	0.765	0.696	1.52e-14
Sesn1	9.08e-19	0.248042	0.411	0.322	1.63e-14
Rpl39	1.08e-18	-0.13156	0.983	0.988	1.93e-14
Ppp1r35	1.4e-18	-0.21589	0.101	0.163	2.51e-14
Nfib	1.46e-18	-0.19593	0.794	0.83	2.62e-14
Klf6	1.69e-18	0.272215	0.884	0.857	3.03e-14
Dnajb1	1.77e-18	0.23703	0.366	0.275	3.17e-14
Edf1	2.35e-18	-0.20148	0.703	0.755	4.22e-14
Zfand5	2.83e-18	0.233521	0.511	0.423	5.07e-14
Mrpl50	3.38e-18	-0.20174	0.088	0.148	6.06e-14
Slc16a9	3.47e-18	-0.27403	0.292	0.372	6.21e-14
Snw1	3.83e-18	-0.25582	0.31	0.387	6.86e-14
Coa3	4.07e-18	-0.21726	0.399	0.481	7.29e-14
Slc38a5	4.93e-18	0.245505	0.337	0.249	8.83e-14
Angpt2	5.48e-18	0.217814	0.106	0.054	9.82e-14
Gng11	5.62e-18	-0.15902	0.925	0.942	1.01e-13
Taf13	5.89e-18	0.187305	0.183	0.115	1.06e-13
H1f0	5.92e-18	-0.2887	0.252	0.328	1.06e-13
A030001D20Rik	6.81e-18	0.133912	0.077	0.032	1.22e-13
Tmsb4x	7.97e-18	0.102345	1	1	1.43e-13
Tnrc6a	8.21e-18	-0.22418	0.323	0.404	1.47e-13
Nsd1	9.36e-18	-0.24043	0.342	0.421	1.68e-13
Marf1	9.53e-18	-0.23518	0.163	0.232	1.71e-13
Rdx	1e-17	-0.20215	0.79	0.831	1.8e-13
Dpm3	1.19e-17	-0.21785	0.485	0.556	2.13e-13
Xaf1	1.31e-17	-0.2482	0.295	0.375	2.35e-13
Nxn	1.5e-17	0.214458	0.52	0.427	2.69e-13
Gna11	1.82e-17	-0.21526	0.499	0.572	3.26e-13
Upf2	1.96e-17	-0.23516	0.274	0.351	3.51e-13
Atox1	2e-17	-0.14834	0.94	0.958	3.59e-13
Zfp644	2.37e-17	0.202872	0.45	0.357	4.24e-13
Wdr43	2.39e-17	-0.2348	0.172	0.241	4.28e-13
Nfe2l1	2.42e-17	-0.23353	0.518	0.583	4.33e-13
Pcf11	2.73e-17	0.223731	0.259	0.182	4.89e-13
Smim26	2.73e-17	-0.20114	0.199	0.273	4.9e-13
Sec61b	3.49e-17	-0.19526	0.524	0.597	6.25e-13
Actr3	3.69e-17	0.233992	0.529	0.444	6.62e-13
Dleu2	3.72e-17	-0.23388	0.161	0.229	6.67e-13
Zic5	3.91e-17	-0.19154	0.079	0.134	7e-13
Itpripl1	4.05e-17	-0.16766	0.073	0.126	7.27e-13
Nfe2l2	4.61e-17	-0.23226	0.345	0.423	8.27e-13
Zscan26	4.85e-17	-0.22932	0.193	0.264	8.7e-13
Gpx1	5.05e-17	0.297243	0.681	0.632	9.04e-13
Napepld	5.34e-17	-0.17476	0.067	0.119	9.57e-13
Ier5l	5.89e-17	0.216582	0.342	0.258	1.05e-12
Fos	6.06e-17	0.130169	0.874	0.8	1.09e-12
Cox7c	6.37e-17	-0.16004	0.88	0.906	1.14e-12
Dph3	7.17e-17	0.21488	0.399	0.309	1.28e-12
Mafg	7.61e-17	0.199489	0.3	0.218	1.36e-12
Inip	8.23e-17	-0.14295	0.037	0.078	1.48e-12
Sf3b1	9.07e-17	0.211946	0.732	0.671	1.63e-12
Ankrd49	1.06e-16	-0.16768	0.048	0.093	1.89e-12
Ddc	1.07e-16	0.212937	0.63	0.548	1.92e-12
B430010I23Rik	1.1e-16	-0.19774	0.107	0.167	1.98e-12
Dusp5	1.15e-16	0.082302	0.03	0.005	2.05e-12
Nsa2	1.17e-16	-0.24533	0.497	0.565	2.1e-12
Arf6	1.22e-16	0.201435	0.507	0.418	2.19e-12
Smim7	1.22e-16	0.21524	0.338	0.257	2.19e-12
Anxa2	1.31e-16	-0.22633	0.43	0.504	2.35e-12
Rai14	1.88e-16	0.229395	0.376	0.294	3.37e-12
Mtif3	1.88e-16	-0.15119	0.042	0.085	3.38e-12
Trim34a	2e-16	-0.18006	0.091	0.147	3.59e-12
Tnfaip1	2.99e-16	0.213325	0.44	0.358	5.36e-12
Hnrnpm	3.01e-16	-0.22272	0.523	0.583	5.4e-12
Fosb	3.23e-16	0.184011	0.662	0.573	5.79e-12
Tinagl1	3.37e-16	0.210118	0.714	0.649	6.03e-12
Acox1	3.43e-16	0.219641	0.324	0.246	6.14e-12
Zcchc7	3.8e-16	-0.20014	0.247	0.323	6.81e-12
Rpl3	4.3e-16	0.136349	0.961	0.943	7.71e-12
Nr4a3	4.67e-16	0.097375	0.041	0.011	8.37e-12
Swt1	6.63e-16	-0.21618	0.24	0.314	1.19e-11
Fxr1	6.64e-16	-0.20177	0.469	0.543	1.19e-11
Rps11	6.92e-16	0.158356	0.955	0.939	1.24e-11
Cpe	9.23e-16	0.229978	0.273	0.2	1.65e-11
Mrpl43	9.6e-16	-0.20003	0.224	0.295	1.72e-11
Rps21	9.76e-16	-0.09568	0.996	0.999	1.75e-11
Rps19bp1	1.02e-15	-0.17058	0.071	0.121	1.83e-11
Rpl10a	1.06e-15	0.138309	0.904	0.879	1.89e-11
Ywhaz	1.09e-15	0.173217	0.765	0.715	1.96e-11
Pmaip1	1.18e-15	0.246672	0.255	0.183	2.11e-11
Ndufc1	1.21e-15	-0.20414	0.417	0.49	2.16e-11
Socs2	1.23e-15	-0.24766	0.236	0.305	2.21e-11
Zfp937	1.35e-15	-0.09297	0.013	0.04	2.41e-11
Tmem70	1.42e-15	-0.16654	0.099	0.156	2.54e-11
Pdcd11	1.42e-15	-0.18199	0.118	0.178	2.55e-11
Slc1a1	1.53e-15	0.190205	0.738	0.667	2.74e-11
Pfdn1	1.89e-15	-0.20487	0.486	0.553	3.38e-11
9930111J21Rik2	2e-15	-0.23977	0.273	0.348	3.58e-11
Pttg1ip	2.07e-15	0.18716	0.691	0.622	3.7e-11
Ndufa4	2.07e-15	-0.15702	0.863	0.888	3.71e-11
Polr1d	2.1e-15	-0.19716	0.485	0.546	3.77e-11
Ceacam1	2.21e-15	-0.21198	0.37	0.442	3.96e-11
Thsd1	2.28e-15	-0.21978	0.304	0.379	4.09e-11
Tsc22d1	2.35e-15	0.152964	0.993	0.991	4.21e-11
Ddx18	2.48e-15	-0.21096	0.213	0.284	4.44e-11
Cfap97	2.76e-15	-0.18938	0.089	0.142	4.95e-11
Zfp770	3.02e-15	-0.10593	0.028	0.062	5.41e-11
Kcnj2	3.19e-15	-0.12747	0.023	0.055	5.72e-11
Klf3	3.23e-15	0.221983	0.539	0.453	5.8e-11
Tril	3.37e-15	-0.23723	0.203	0.269	6.04e-11
Hba-a1	3.76e-15	-1.24994	0.002	0.018	6.74e-11
Csnk1e	3.86e-15	0.200318	0.366	0.285	6.92e-11
Dusp16	4.34e-15	0.15976	0.135	0.081	7.78e-11
Unc45b	4.4e-15	0.193367	0.283	0.209	7.88e-11
Irf9	4.75e-15	-0.23216	0.176	0.241	8.52e-11
Rbm5	4.84e-15	-0.22112	0.284	0.357	8.68e-11
Mir155hg	5.15e-15	0.092476	0.037	0.01	9.22e-11
1110004F10Rik	5.68e-15	-0.20185	0.474	0.543	1.02e-10
Ddhd2	6.1e-15	-0.18744	0.097	0.15	1.09e-10
Rps5	6.98e-15	0.113085	0.989	0.984	1.25e-10
Slc7a1	7.11e-15	0.190598	0.835	0.769	1.27e-10
Snrpf	7.14e-15	-0.19338	0.461	0.525	1.28e-10
Erf	8.1e-15	0.175093	0.172	0.112	1.45e-10
Gcnt2	8.11e-15	0.210093	0.465	0.386	1.45e-10
Camk2n1	8.68e-15	0.197851	0.509	0.422	1.55e-10
Kti12	9.54e-15	0.19399	0.22	0.153	1.71e-10
2023-03-07	9.55e-15	0.199693	0.339	0.261	1.71e-10
Polr2l	1.01e-14	-0.17179	0.096	0.149	1.81e-10
Gnb1	1.02e-14	-0.17296	0.744	0.774	1.83e-10
Polr2e	1.03e-14	-0.2282	0.371	0.439	1.84e-10
Sar1a	1.09e-14	0.1839	0.358	0.28	1.96e-10
Cdk19	1.16e-14	-0.23228	0.178	0.242	2.07e-10
Dazap2	1.17e-14	0.1804	0.505	0.42	2.1e-10
Senp5	1.21e-14	-0.19504	0.138	0.198	2.17e-10
Mdm2	1.22e-14	0.159915	0.184	0.121	2.18e-10
Nckap1	1.27e-14	-0.2065	0.394	0.468	2.28e-10
Gm16046	1.57e-14	-0.1833	0.104	0.158	2.81e-10
Clic1	1.59e-14	0.162721	0.795	0.743	2.85e-10
Ahsa1	1.73e-14	-0.18074	0.17	0.235	3.1e-10
Atp5e	1.81e-14	-0.16427	0.867	0.881	3.24e-10
Snrpg	1.83e-14	-0.15837	0.74	0.785	3.27e-10
Gm4258	1.86e-14	-0.09169	0.014	0.039	3.33e-10
Synpo2	1.87e-14	-0.18641	0.11	0.165	3.35e-10
Cfl1	1.9e-14	0.13355	0.918	0.904	3.4e-10
Tmem126b	2.01e-14	-0.14597	0.058	0.102	3.6e-10
Map1lc3a	2.17e-14	0.1594	0.692	0.62	3.89e-10
Bbc3	2.32e-14	0.14544	0.129	0.077	4.16e-10
Nop53	2.38e-14	0.182763	0.361	0.283	4.26e-10
Romo1	2.57e-14	-0.2065	0.403	0.474	4.61e-10
Atp5b	2.6e-14	0.153844	0.804	0.737	4.67e-10
Sarnp	2.73e-14	-0.20221	0.425	0.489	4.89e-10
Eif4a2	2.78e-14	0.186255	0.641	0.565	4.99e-10
Pnn	2.82e-14	-0.22042	0.417	0.483	5.05e-10
Klf13	2.98e-14	0.174045	0.784	0.733	5.35e-10
Prnp	3.03e-14	0.196207	0.693	0.628	5.43e-10
Samd9l	4.06e-14	-0.2071	0.215	0.283	7.27e-10
Ctsc	4.41e-14	0.199577	0.255	0.186	7.89e-10
Cited4	4.45e-14	-0.11501	0.029	0.062	7.98e-10
Bola2	4.47e-14	-0.18951	0.247	0.315	8e-10
Gna13	4.49e-14	0.195473	0.29	0.219	8.05e-10
Mterf2	4.8e-14	-0.11075	0.022	0.053	8.6e-10
Mrpl17	5.96e-14	-0.19456	0.224	0.291	1.07e-09
Rbx1	6.22e-14	-0.15585	0.725	0.768	1.11e-09
Crybg3	6.48e-14	-0.21046	0.51	0.569	1.16e-09
Trim8	6.7e-14	-0.19566	0.163	0.223	1.2e-09
Rnf19a	7.09e-14	0.176505	0.299	0.226	1.27e-09
Emcn	7.19e-14	0.134346	0.948	0.923	1.29e-09
Gt(ROSA)26Sor	8.06e-14	0.163471	0.218	0.151	1.44e-09
Isg15	8.22e-14	-0.34075	0.312	0.379	1.47e-09
Chmp3	8.36e-14	-0.21129	0.538	0.591	1.5e-09
Fam13a	8.52e-14	-0.18578	0.076	0.123	1.53e-09
Ubl3	9.09e-14	0.182177	0.678	0.609	1.63e-09
Ccnt1	9.14e-14	0.183909	0.299	0.227	1.64e-09
Hspb1	9.74e-14	-0.16611	0.969	0.98	1.75e-09
Itm2a	1.02e-13	0.10779	0.999	0.998	1.83e-09
Atp5j2	1.15e-13	-0.14437	0.807	0.829	2.06e-09
Syn3	1.17e-13	0.185676	0.154	0.1	2.09e-09
Igfbp7	1.21e-13	-0.16206	0.991	0.989	2.16e-09
Kdm1a	1.23e-13	-0.20921	0.252	0.317	2.2e-09
Pkp4	1.28e-13	0.187062	0.378	0.302	2.3e-09
Aldh2	1.3e-13	0.145277	0.823	0.774	2.32e-09
Phlda1	1.32e-13	0.159082	0.086	0.045	2.36e-09
Ppid	1.35e-13	-0.2044	0.221	0.285	2.41e-09
Pdcd7	1.4e-13	-0.17473	0.105	0.158	2.5e-09
Hba-a2	1.43e-13	-0.97037	0.001	0.013	2.57e-09
Abhd2	1.53e-13	-0.17955	0.737	0.774	2.73e-09
Fzd6	1.58e-13	-0.21473	0.406	0.469	2.83e-09
Crip1	1.63e-13	-0.22575	0.594	0.648	2.93e-09
Eif2s3y	1.66e-13	-0.15641	0.071	0.116	2.98e-09
Pik3c2a	1.95e-13	-0.21899	0.43	0.494	3.49e-09
Atp5md	1.98e-13	-0.17743	0.586	0.638	3.56e-09
Ppp1cc	2.1e-13	0.184189	0.397	0.32	3.76e-09
Arhgef1	2.28e-13	-0.20555	0.332	0.394	4.09e-09
Ifitm3	2.5e-13	-0.19886	0.9	0.911	4.48e-09
Mrps21	2.51e-13	-0.19553	0.446	0.506	4.5e-09
Ikzf5	2.53e-13	-0.21293	0.206	0.266	4.54e-09
Arf4	2.57e-13	0.18451	0.562	0.483	4.6e-09
Pdia3	2.87e-13	-0.19644	0.599	0.643	5.14e-09
Rpl30	2.98e-13	0.092285	0.997	0.997	5.35e-09
Icam1	3.08e-13	0.178802	0.141	0.088	5.52e-09
Rrnad1	3.12e-13	-0.1167	0.041	0.077	5.59e-09
Eif3f	3.17e-13	0.156069	0.807	0.759	5.68e-09
Mrps14	3.2e-13	-0.19448	0.397	0.463	5.74e-09
Crk	3.26e-13	0.18619	0.398	0.322	5.84e-09
Prorsd1	3.58e-13	-0.16836	0.087	0.136	6.42e-09
Rgs2	4.18e-13	0.101964	0.046	0.017	7.49e-09
Pcna	4.26e-13	0.183449	0.28	0.211	7.63e-09
Jup	4.4e-13	-0.20439	0.397	0.455	7.89e-09
Cnot4	4.54e-13	-0.18824	0.21	0.272	8.14e-09
Cyth2	4.93e-13	0.166671	0.284	0.213	8.83e-09
Cct2	5.08e-13	0.164738	0.46	0.385	9.11e-09
Fam71a	5.34e-13	0.121433	0.075	0.038	9.57e-09
Palm	5.38e-13	-0.21775	0.473	0.529	9.64e-09
Mdh1	5.6e-13	-0.17868	0.218	0.283	1e-08
Chchd1	5.64e-13	-0.19049	0.254	0.32	1.01e-08
Notch1	5.72e-13	0.16602	0.602	0.52	1.02e-08
Rap2b	6.04e-13	-0.12843	0.061	0.104	1.08e-08
Cfap20	6.16e-13	-0.17066	0.148	0.206	1.1e-08
Irf2bp2	6.18e-13	-0.20933	0.389	0.45	1.11e-08
Bloc1s1	6.46e-13	-0.19946	0.28	0.345	1.16e-08
Hlx	6.56e-13	-0.18244	0.087	0.133	1.18e-08
Dctn4	6.85e-13	-0.18738	0.291	0.358	1.23e-08
Skp1a	7.68e-13	-0.19682	0.446	0.509	1.38e-08
Rplp2	8.63e-13	0.097543	0.977	0.972	1.55e-08
Zfp472	8.71e-13	-0.09784	0.019	0.046	1.56e-08
Rpl34	8.98e-13	0.090121	0.995	0.995	1.61e-08
Tmem204	9.55e-13	-0.16947	0.656	0.703	1.71e-08
Ddit4	9.86e-13	0.254364	0.456	0.386	1.77e-08
Slc15a2	1.15e-12	-0.05144	0.003	0.018	2.06e-08
Hhex	1.16e-12	0.171073	0.232	0.168	2.08e-08
Chst2	1.24e-12	0.162016	0.138	0.088	2.22e-08
Dnm1l	1.32e-12	-0.19508	0.219	0.28	2.37e-08
Hypk	1.42e-12	-0.19115	0.349	0.414	2.55e-08
Map3k6	1.45e-12	0.152024	0.145	0.094	2.6e-08
Rlim	1.55e-12	0.158179	0.232	0.17	2.78e-08
Zfp60	1.65e-12	-0.10603	0.027	0.057	2.96e-08
Myef2	1.66e-12	-0.18479	0.119	0.17	2.98e-08
Acvrl1	1.77e-12	0.148258	0.828	0.778	3.17e-08
Rusc1	1.93e-12	0.162276	0.193	0.135	3.46e-08
1700084E18Rik	1.94e-12	0.082286	0.043	0.016	3.48e-08
Arl4a	1.94e-12	0.121073	0.972	0.968	3.48e-08
Mapre1	1.95e-12	0.181663	0.557	0.486	3.5e-08
Ier2	2e-12	0.011949	0.913	0.846	3.58e-08
Tceanc2	2.05e-12	-0.11052	0.029	0.06	3.67e-08
Naa20	2.15e-12	-0.15831	0.228	0.294	3.86e-08
Hmgb1	2.21e-12	-0.11486	0.953	0.963	3.97e-08
Tcf15	2.4e-12	0.16861	0.209	0.149	4.31e-08
Sos1	2.47e-12	0.184464	0.491	0.419	4.43e-08
Tcf4	2.5e-12	-0.13392	0.926	0.95	4.47e-08
Prdx1	2.62e-12	-0.17611	0.774	0.8	4.69e-08
Tbx1	2.67e-12	0.157719	0.175	0.119	4.79e-08
Lipe	2.71e-12	-0.17039	0.124	0.177	4.85e-08
Erg	2.95e-12	0.163546	0.473	0.397	5.29e-08
Rnf219	3.07e-12	-0.10819	0.026	0.056	5.5e-08
Utp11	3.11e-12	-0.21109	0.285	0.347	5.57e-08
Itgb1	3.28e-12	-0.15493	0.776	0.807	5.88e-08
Elob	3.45e-12	-0.13115	0.832	0.87	6.18e-08
Zfp442	3.69e-12	-0.10656	0.026	0.054	6.61e-08
Sub1	3.85e-12	0.162289	0.796	0.748	6.89e-08
Cwf19l2	3.87e-12	-0.21271	0.241	0.301	6.93e-08
Siah2	3.96e-12	0.114874	0.081	0.043	7.1e-08
Lyl1	4.01e-12	-0.10702	0.035	0.067	7.19e-08
Spred2	4.16e-12	0.163477	0.252	0.188	7.45e-08
Gm32352	4.17e-12	0.068123	0.029	0.008	7.47e-08
Notumos	4.17e-12	-0.09044	0.022	0.05	7.48e-08
Spaar	4.18e-12	-0.19871	0.133	0.185	7.49e-08
Bet1l	4.3e-12	-0.1926	0.148	0.202	7.7e-08
Vcl	4.31e-12	0.208661	0.336	0.269	7.72e-08
Tsc22d4	4.44e-12	-0.13945	0.056	0.095	7.95e-08
Eif3g	4.52e-12	0.168263	0.373	0.302	8.09e-08
Tpm1	4.65e-12	-0.1857	0.619	0.66	8.34e-08
Dhx8	4.77e-12	-0.12612	0.087	0.134	8.54e-08
Fam13c	4.92e-12	-0.21275	0.464	0.521	8.82e-08
Ndufa1	5.3e-12	-0.17698	0.54	0.594	9.5e-08
Rora	5.32e-12	0.167326	0.398	0.323	9.53e-08
Snx3	5.44e-12	-0.1341	0.837	0.866	9.75e-08
Hsp90aa1	5.78e-12	0.177811	0.708	0.659	1.04e-07
Coa6	6.21e-12	-0.155	0.088	0.134	1.11e-07
Itga6	6.23e-12	0.154688	0.829	0.78	1.12e-07
Egfl7	6.9e-12	0.179541	0.989	0.985	1.24e-07
Pdcd6	7.31e-12	0.153858	0.406	0.33	1.31e-07
Rpl7a	7.48e-12	0.136024	0.861	0.808	1.34e-07
Tomm6	7.58e-12	-0.15443	0.633	0.676	1.36e-07
Txndc11	7.71e-12	0.107219	0.091	0.051	1.38e-07
Zfp955a	8.05e-12	-0.0874	0.018	0.043	1.44e-07
Rps17	8.11e-12	0.112902	0.922	0.899	1.45e-07
Tnfaip8l1	8.19e-12	0.13567	0.099	0.058	1.47e-07
Ccdc117	8.7e-12	-0.13401	0.071	0.113	1.56e-07
Elk3	8.71e-12	-0.2025	0.522	0.574	1.56e-07
Wdr70	8.98e-12	-0.16973	0.15	0.204	1.61e-07
Rrp36	9.26e-12	-0.12554	0.057	0.095	1.66e-07
Sf1	9.83e-12	0.17041	0.347	0.277	1.76e-07
Hspa5	1.05e-11	0.142601	0.705	0.633	1.88e-07
Stmn2	1.06e-11	-0.20217	0.034	0.065	1.89e-07
Ssbp1	1.09e-11	-0.16376	0.202	0.262	1.96e-07
Ndufs5	1.12e-11	-0.16216	0.651	0.696	2.01e-07
Endou	1.16e-11	0.108159	0.061	0.03	2.08e-07
Psmg3	1.2e-11	-0.12341	0.055	0.093	2.15e-07
Tuba1c	1.22e-11	0.094337	0.059	0.028	2.18e-07
Pdcl3	1.22e-11	0.188391	0.471	0.404	2.18e-07
Nifk	1.27e-11	-0.16131	0.105	0.152	2.27e-07
Nop10	1.38e-11	-0.18456	0.37	0.431	2.48e-07
Atrx	1.39e-11	-0.18179	0.622	0.671	2.49e-07
Rpl21	1.5e-11	0.097188	0.993	0.993	2.69e-07
Zfp955b	1.52e-11	-0.12391	0.039	0.072	2.72e-07
Afdn	1.61e-11	-0.16632	0.693	0.733	2.88e-07
Nsrp1	1.78e-11	0.155482	0.296	0.229	3.19e-07
Zfp160	1.78e-11	-0.13591	0.046	0.081	3.2e-07
Med21	1.84e-11	-0.17252	0.269	0.331	3.29e-07
Far2	1.85e-11	-0.15182	0.117	0.167	3.31e-07
Utp23	1.87e-11	-0.12008	0.038	0.071	3.34e-07
Irf8	1.91e-11	0.053871	0.017	0.002	3.42e-07
Hnrnpa1	1.93e-11	0.167778	0.456	0.381	3.46e-07
Rarg	1.96e-11	-0.15248	0.103	0.149	3.52e-07
Tssc4	2.14e-11	0.154531	0.217	0.157	3.84e-07
Zfp260	2.19e-11	-0.15934	0.098	0.144	3.92e-07
Ostc	2.2e-11	-0.17819	0.269	0.329	3.94e-07
Brd7	2.27e-11	-0.18576	0.247	0.305	4.07e-07
Acsl3	2.29e-11	-0.23085	0.264	0.322	4.11e-07
Afap1l2	2.4e-11	-0.17901	0.219	0.277	4.31e-07
Cstb	2.5e-11	0.197251	0.481	0.405	4.49e-07
Zfp874b	2.55e-11	-0.09957	0.027	0.055	4.56e-07
Dhx36	2.59e-11	-0.1834	0.304	0.366	4.63e-07
Oasl2	2.68e-11	-0.20746	0.13	0.178	4.81e-07
Ndel1	2.79e-11	0.169267	0.337	0.268	5e-07
Tubb5	2.87e-11	-0.15473	0.694	0.735	5.14e-07
Gtf3c3	2.87e-11	-0.12255	0.052	0.088	5.15e-07
Med31	2.91e-11	-0.17368	0.18	0.233	5.21e-07
Asnsd1	2.91e-11	-0.16094	0.113	0.16	5.22e-07
Smn1	2.91e-11	-0.15553	0.103	0.15	5.22e-07
3222401L13Rik	2.95e-11	-0.19211	0.135	0.185	5.29e-07
Lamtor2	3.21e-11	-0.17133	0.454	0.507	5.75e-07
Tmc7	3.33e-11	0.158436	0.319	0.249	5.98e-07
Thoc1	3.68e-11	-0.16232	0.179	0.234	6.59e-07
Pdik1l	3.77e-11	-0.12789	0.045	0.078	6.76e-07
Fam133b	3.86e-11	-0.21165	0.234	0.291	6.91e-07
Zfp760	3.89e-11	-0.08625	0.021	0.047	6.96e-07
Lfng	3.89e-11	-0.11708	0.058	0.096	6.98e-07
Pdia6	3.97e-11	-0.17569	0.426	0.483	7.11e-07
Eif4ebp2	4.03e-11	-0.16499	0.179	0.234	7.22e-07
Med19	4.26e-11	-0.17312	0.184	0.238	7.63e-07
Erg28	4.32e-11	-0.13975	0.083	0.125	7.74e-07
1110038F14Rik	4.32e-11	-0.18538	0.257	0.314	7.74e-07
Tut7	4.38e-11	0.176662	0.537	0.468	7.85e-07
Trp53inp2	4.39e-11	0.136149	0.136	0.089	7.88e-07
Psme1	4.43e-11	-0.16345	0.624	0.67	7.93e-07
Srgap2	4.45e-11	-0.14985	0.574	0.627	7.97e-07
Serpinb6b	4.79e-11	-0.20465	0.209	0.266	8.59e-07
Hmgb2	4.83e-11	-0.15756	0.444	0.507	8.65e-07
Adgrf5	4.91e-11	0.113769	0.967	0.949	8.79e-07
Csnk1d	5.02e-11	0.16146	0.285	0.223	8.99e-07
Fam181b	5.05e-11	-0.15363	0.062	0.099	9.04e-07
Gm12840	5.08e-11	0.198092	0.026	0.007	9.1e-07
Zfp622	5.19e-11	0.134937	0.184	0.131	9.29e-07
Rps20	5.31e-11	0.086998	0.996	0.994	9.51e-07
Atp5j	5.55e-11	-0.12028	0.919	0.924	9.94e-07
Lrrc58	5.81e-11	0.157521	0.475	0.4	1.04e-06
Dennd4a	5.89e-11	0.116116	0.083	0.047	1.06e-06
Tex10	5.98e-11	-0.1398	0.074	0.115	1.07e-06
Adm	6.3e-11	0.175208	0.186	0.134	1.13e-06
Rps10	6.68e-11	0.091244	0.994	0.989	1.2e-06
Tmem167	6.73e-11	-0.17493	0.235	0.293	1.21e-06
Rad23a	7.06e-11	-0.18611	0.193	0.244	1.27e-06
Rps27a	7.28e-11	0.089965	0.994	0.994	1.31e-06
Smad7	7.57e-11	0.164687	0.607	0.547	1.36e-06
Luzp1	7.82e-11	0.155468	0.815	0.77	1.4e-06
Lig4	8.01e-11	-0.06461	0.009	0.027	1.44e-06
Magoh	8.28e-11	0.156009	0.416	0.348	1.48e-06
Entpd1	8.29e-11	-0.18057	0.202	0.258	1.49e-06
Zfp846	8.68e-11	-0.0929	0.02	0.044	1.55e-06
Bmx	8.81e-11	-0.10698	0.017	0.04	1.58e-06
Slc26a10	8.87e-11	-0.18531	0.04	0.071	1.59e-06
Calm1	8.96e-11	0.101954	0.998	0.996	1.61e-06
Mrm2	9.07e-11	-0.08178	0.021	0.046	1.63e-06
A330009N23Rik	9.21e-11	-0.10012	0.033	0.063	1.65e-06
Ppcs	9.55e-11	-0.11203	0.033	0.063	1.71e-06
Herpud1	9.87e-11	0.153834	0.497	0.425	1.77e-06
Rgs3	1.02e-10	-0.17648	0.199	0.254	1.82e-06
Gm45051	1.02e-10	0.118718	0.091	0.054	1.83e-06
Zfp958	1.06e-10	-0.08581	0.023	0.049	1.9e-06
Hnrnpdl	1.1e-10	0.149096	0.554	0.473	1.97e-06
Fas	1.13e-10	0.173873	0.586	0.52	2.02e-06
Herc2	1.14e-10	-0.20798	0.264	0.32	2.04e-06
Car5a	1.17e-10	-0.25261	0.311	0.368	2.09e-06
Msn	1.22e-10	0.161032	0.698	0.646	2.19e-06
Jrkl	1.23e-10	-0.1073	0.05	0.085	2.2e-06
Nrd1	1.3e-10	-0.18618	0.378	0.433	2.34e-06
Tifa	1.36e-10	0.120249	0.112	0.07	2.43e-06
Cbx8	1.45e-10	-0.08642	0.019	0.042	2.6e-06
Tmem208	1.45e-10	-0.17241	0.17	0.221	2.6e-06
Cdk9	1.46e-10	0.139853	0.278	0.216	2.62e-06
Xpo1	1.48e-10	-0.13753	0.109	0.156	2.65e-06
Lage3	1.48e-10	-0.15808	0.171	0.221	2.66e-06
Hnrnpd	1.55e-10	0.155496	0.498	0.435	2.78e-06
Eif3h	1.58e-10	0.160609	0.679	0.628	2.83e-06
Rpl10-ps3	1.58e-10	0.126209	0.114	0.073	2.84e-06
Rpl37	1.61e-10	-0.07756	0.998	0.996	2.88e-06
Sem1	1.61e-10	-0.12639	0.854	0.879	2.89e-06
Ptges3	1.62e-10	-0.17952	0.521	0.563	2.9e-06
Tmem140	1.63e-10	-0.17088	0.26	0.317	2.92e-06
Gde1	1.71e-10	0.171807	0.426	0.361	3.06e-06
Fam32a	1.76e-10	-0.17663	0.333	0.387	3.16e-06
Pon2	1.87e-10	0.162346	0.669	0.615	3.35e-06
Wfdc1	1.95e-10	0.138772	0.848	0.815	3.49e-06
Rela	2.01e-10	0.16433	0.27	0.21	3.61e-06
Bnip3	2.07e-10	-0.16593	0.241	0.299	3.71e-06
Pet100	2.11e-10	-0.17222	0.299	0.354	3.77e-06
Ralgapa1	2.2e-10	-0.20159	0.414	0.465	3.94e-06
Mrps31	2.32e-10	-0.13969	0.1	0.145	4.16e-06
Gpr4	2.33e-10	0.158312	0.348	0.283	4.17e-06
Nadk	2.43e-10	-0.1501	0.147	0.197	4.35e-06
Tmem248	2.58e-10	0.110684	0.145	0.099	4.62e-06
Gadd45b	2.64e-10	0.192304	0.214	0.158	4.74e-06
Gm10076	2.79e-10	0.151806	0.245	0.185	5e-06
Smim27	2.82e-10	-0.1777	0.164	0.214	5.05e-06
Vasp	3.02e-10	0.161172	0.31	0.248	5.41e-06
Spty2d1	3.06e-10	0.134192	0.202	0.148	5.49e-06
Taf1d	3.26e-10	-0.15431	0.239	0.295	5.84e-06
Lncpint	3.58e-10	0.14509	0.196	0.143	6.42e-06
Jagn1	3.59e-10	-0.13876	0.092	0.134	6.44e-06
Hnrnpa0	3.62e-10	0.120708	0.851	0.818	6.49e-06
Jag1	3.72e-10	-0.15356	0.121	0.167	6.66e-06
Slc3a2	3.82e-10	0.124711	0.913	0.88	6.85e-06
Tob2	3.85e-10	0.158249	0.279	0.219	6.89e-06
AI480526	4.01e-10	-0.06686	0.014	0.034	7.19e-06
Eid2b	4.02e-10	-0.12379	0.067	0.104	7.21e-06
Mtf2	4.03e-10	-0.15133	0.105	0.149	7.22e-06
Rsl1	4.04e-10	-0.06608	0.014	0.034	7.23e-06
Wdr37	4.05e-10	0.14345	0.263	0.204	7.26e-06
Mrpl52	4.23e-10	-0.17344	0.33	0.388	7.57e-06
Plekhj1	4.25e-10	-0.14718	0.116	0.161	7.61e-06
Elof1	4.39e-10	-0.16343	0.19	0.243	7.86e-06
Fau	4.52e-10	0.074083	0.999	0.998	8.11e-06
Cirbp	4.58e-10	0.148034	0.383	0.313	8.21e-06
Cir1	4.63e-10	-0.19776	0.25	0.306	8.29e-06
Gclm	4.88e-10	-0.17628	0.395	0.445	8.75e-06
AI987944	5.08e-10	-0.11722	0.043	0.074	9.1e-06
Rtl8b	5.14e-10	-0.18807	0.335	0.39	9.21e-06
Thap3	5.26e-10	-0.16129	0.171	0.222	9.43e-06
S100a11	5.31e-10	-0.219	0.368	0.417	9.52e-06
Mrpl34	5.48e-10	-0.17952	0.206	0.257	9.82e-06
A130014A01Rik	5.83e-10	-0.10965	0.033	0.06	1.04e-05
Commd5	5.94e-10	-0.06155	0.012	0.03	1.06e-05
Pdia4	6.04e-10	-0.18273	0.172	0.22	1.08e-05
0610009B22Rik	6.06e-10	-0.13129	0.096	0.138	1.09e-05
Ccdc28b	6.35e-10	-0.15498	0.162	0.211	1.14e-05
Btg3	6.74e-10	0.12951	0.581	0.514	1.21e-05
Slc39a8	6.83e-10	0.161603	0.473	0.404	1.22e-05
Snrnp48	7.01e-10	-0.17165	0.237	0.292	1.26e-05
Smco4	7.14e-10	-0.16922	0.477	0.527	1.28e-05
Tgs1	7.32e-10	-0.15217	0.174	0.225	1.31e-05
Spry4	8.32e-10	0.085387	0.066	0.035	1.49e-05
Mier1	8.59e-10	-0.17168	0.625	0.667	1.54e-05
Snhg20	8.67e-10	-0.13435	0.067	0.102	1.55e-05
Angptl4	8.82e-10	-0.125	0.051	0.084	1.58e-05
Dancr	9.09e-10	0.101212	0.062	0.033	1.63e-05
Taf7	9.34e-10	0.141346	0.328	0.264	1.67e-05
Apol8	9.69e-10	0.042086	0.016	0.002	1.74e-05
Foxl2	1.01e-09	-0.16118	0.158	0.207	1.81e-05
Tomm5	1.01e-09	-0.16078	0.175	0.226	1.81e-05
Fam177a	1.01e-09	-0.10032	0.033	0.06	1.81e-05
Mlh3	1.02e-09	-0.12945	0.063	0.098	1.82e-05
Cenpb	1.02e-09	0.154632	0.484	0.414	1.83e-05
Ankra2	1.02e-09	-0.13815	0.12	0.165	1.83e-05
Cd93	1.05e-09	0.175606	0.63	0.569	1.89e-05
Rnaset2a	1.07e-09	-0.13675	0.446	0.51	1.91e-05
Gm48768	1.1e-09	-0.0918	0.028	0.054	1.97e-05
Vamp3	1.12e-09	0.155871	0.561	0.495	2e-05
Pak1ip1	1.12e-09	0.165234	0.525	0.46	2e-05
Uimc1	1.19e-09	-0.14626	0.149	0.197	2.13e-05
Nasp	1.22e-09	0.133419	0.192	0.142	2.19e-05
Zfp868	1.3e-09	0.09833	0.088	0.053	2.32e-05
Cyb5a	1.32e-09	-0.15392	0.521	0.572	2.36e-05
Tra2a	1.32e-09	-0.17166	0.4	0.453	2.37e-05
Zrsr2	1.35e-09	0.144332	0.312	0.249	2.42e-05
Rpl27	1.39e-09	0.090481	0.984	0.979	2.48e-05
Cox6c	1.42e-09	-0.11563	0.912	0.923	2.55e-05
Sars	1.44e-09	-0.16466	0.274	0.326	2.58e-05
Prr7	1.45e-09	0.083939	0.048	0.022	2.61e-05
Dusp2	1.46e-09	0.071009	0.032	0.012	2.61e-05
Nedd8	1.47e-09	-0.13651	0.704	0.732	2.63e-05
Tdp2	1.48e-09	0.122377	0.144	0.1	2.64e-05
Psmc1	1.53e-09	-0.16956	0.36	0.416	2.75e-05
BC005624	1.54e-09	-0.17223	0.28	0.331	2.76e-05
Ypel3	1.56e-09	-0.17668	0.406	0.455	2.8e-05
Wdr73	1.57e-09	-0.07849	0.018	0.04	2.82e-05
Cdh5	1.59e-09	-0.13538	0.844	0.874	2.85e-05
Hmg20b	1.59e-09	-0.18771	0.462	0.511	2.85e-05
Nuak2	1.61e-09	0.061165	0.039	0.017	2.88e-05
Taf1a	1.63e-09	-0.07947	0.025	0.049	2.92e-05
Gnai3	1.69e-09	0.152964	0.333	0.272	3.03e-05
Pnkd	1.72e-09	-0.17398	0.411	0.462	3.08e-05
Gdi2	1.77e-09	0.133914	0.58	0.511	3.17e-05
Mrpl33	1.78e-09	-0.17201	0.452	0.501	3.19e-05
Mrps17	1.79e-09	-0.16275	0.193	0.241	3.21e-05
Acer2	1.8e-09	0.150902	0.419	0.353	3.23e-05
Acot9	1.83e-09	0.120796	0.204	0.152	3.28e-05
Zfp787	1.84e-09	0.106372	0.148	0.102	3.29e-05
Rpp25l	1.84e-09	-0.13806	0.139	0.185	3.29e-05
2210016L21Rik	1.85e-09	-0.14465	0.195	0.247	3.32e-05
5430405H02Rik	1.92e-09	-0.10519	0.045	0.076	3.44e-05
Tpr	1.93e-09	-0.15284	0.586	0.648	3.45e-05
Yae1d1	1.95e-09	-0.15887	0.153	0.2	3.49e-05
Pim3	2.04e-09	0.176604	0.724	0.679	3.66e-05
Zfp738	2.12e-09	-0.08918	0.045	0.075	3.8e-05
Nvl	2.18e-09	-0.14132	0.096	0.137	3.91e-05
Lactb	2.19e-09	0.135677	0.299	0.24	3.93e-05
Eif1a	2.2e-09	0.134983	0.215	0.162	3.95e-05
Thap2	2.23e-09	-0.13235	0.083	0.122	4e-05
Wdr33	2.37e-09	-0.16922	0.272	0.322	4.24e-05
Senp2	2.43e-09	0.099953	0.192	0.141	4.36e-05
Pofut2	2.43e-09	0.127238	0.195	0.145	4.36e-05
Atg14	2.63e-09	-0.13502	0.075	0.111	4.71e-05
Zfp820	2.65e-09	-0.09121	0.031	0.057	4.74e-05
Il17rd	2.78e-09	-0.15621	0.144	0.191	4.98e-05
Dhx15	2.78e-09	-0.1621	0.305	0.357	4.99e-05
Nxt1	2.79e-09	-0.12538	0.079	0.116	5e-05
Ist1	2.79e-09	-0.16604	0.211	0.259	5.01e-05
Rnf5	3.02e-09	-0.08878	0.037	0.065	5.4e-05
0610030E20Rik	3.04e-09	-0.12053	0.09	0.13	5.45e-05
Pdcd2	3.09e-09	-0.10932	0.049	0.08	5.54e-05
Rbbp6	3.17e-09	0.138561	0.445	0.377	5.69e-05
Rbm48	3.26e-09	-0.13187	0.077	0.113	5.85e-05
Trim21	3.28e-09	-0.07693	0.023	0.045	5.87e-05
Eef1b2	3.29e-09	0.11582	0.834	0.796	5.89e-05
Ocln	3.38e-09	-0.13501	0.645	0.686	6.06e-05
Cnot6l	3.39e-09	0.147186	0.593	0.539	6.07e-05
Mrpl15	3.4e-09	-0.15947	0.201	0.251	6.09e-05
Timm13	3.44e-09	-0.15511	0.41	0.461	6.16e-05
Podxl	3.59e-09	-0.13941	0.677	0.711	6.44e-05
Rer1	3.62e-09	-0.153	0.375	0.431	6.49e-05
Dpysl2	3.84e-09	-0.16062	0.307	0.36	6.88e-05
Csrp1	3.84e-09	0.169551	0.334	0.278	6.89e-05
Uqcc2	4.05e-09	-0.15428	0.558	0.596	7.26e-05
Gm15614	4.11e-09	0.053638	0.022	0.006	7.36e-05
Hmgn5	4.14e-09	0.184919	0.209	0.16	7.42e-05
Zfp712	4.17e-09	-0.05604	0.012	0.03	7.47e-05
Cd9	4.24e-09	-0.15177	0.075	0.111	7.6e-05
Selenof	4.3e-09	-0.11889	0.81	0.833	7.7e-05
Zfp628	4.3e-09	0.068725	0.041	0.018	7.71e-05
Igf1r	4.34e-09	-0.0978	0.97	0.972	7.78e-05
Ephb4	4.4e-09	-0.13526	0.108	0.15	7.88e-05
Gorab	4.62e-09	-0.0975	0.033	0.06	8.28e-05
Plscr4	4.65e-09	-0.17494	0.356	0.407	8.33e-05
Pex3	4.96e-09	-0.15143	0.144	0.189	8.89e-05
2310033P09Rik	5.02e-09	-0.14776	0.139	0.184	8.99e-05
Supt4a	5.09e-09	-0.15318	0.358	0.407	9.12e-05
Cdc42ep1	5.29e-09	0.123453	0.2	0.15	9.48e-05
Sgpp2	5.3e-09	-0.16412	0.291	0.344	9.5e-05
Serpine2	5.31e-09	0.138231	0.135	0.094	9.51e-05
Ncoa5	5.37e-09	-0.10102	0.053	0.085	9.62e-05
Snapc1	5.45e-09	-0.15357	0.172	0.22	9.76e-05
Hip1	5.49e-09	-0.14353	0.595	0.637	9.84e-05
Srsf6	5.49e-09	0.139707	0.203	0.153	9.85e-05
Cdv3	5.5e-09	0.151723	0.429	0.369	9.85e-05
Kansl3	5.55e-09	0.129504	0.212	0.162	9.95e-05
Tjp1	5.7e-09	-0.13209	0.856	0.861	0.000102
Zfas1	6.1e-09	0.117884	0.244	0.188	0.000109
Ubl4a	6.38e-09	-0.11105	0.074	0.11	0.000114
Lgalsl	6.38e-09	-0.15389	0.19	0.24	0.000114
Grpel1	6.5e-09	-0.15236	0.281	0.335	0.000117
Anapc16	6.68e-09	-0.16557	0.29	0.344	0.00012
Zfp949	6.81e-09	-0.0771	0.025	0.048	0.000122
Ahnak	6.93e-09	-0.1447	0.86	0.868	0.000124
Klf12	7.47e-09	-0.14329	0.134	0.176	0.000134
Trim25	7.67e-09	-0.14792	0.149	0.193	0.000137
Otulin	7.73e-09	-0.15646	0.156	0.202	0.000139
Brd3	7.81e-09	-0.15205	0.17	0.218	0.00014
Mrpl1	7.97e-09	-0.1372	0.09	0.128	0.000143
Pdap1	8.08e-09	-0.16673	0.52	0.558	0.000145
Nutf2-ps1	8.14e-09	-0.06595	0.023	0.045	0.000146
Zzz3	8.16e-09	-0.16712	0.195	0.241	0.000146
Prkch	8.2e-09	0.136454	0.353	0.292	0.000147
2900076A07Rik	8.67e-09	-0.06281	0.012	0.029	0.000155
Jund	8.9e-09	0.082453	0.998	0.982	0.00016
Fkbp1a	1e-08	-0.14543	0.67	0.702	0.00018
Itprip	1.02e-08	0.073678	0.042	0.02	0.000182
Mars2	1.02e-08	-0.03968	0.005	0.017	0.000183
1190007I07Rik	1.06e-08	-0.09169	0.037	0.064	0.00019
Aimp1	1.1e-08	-0.17517	0.337	0.386	0.000196
Atxn3	1.12e-08	0.118004	0.158	0.114	0.0002
Mtrex	1.14e-08	-0.14607	0.155	0.198	0.000204
Tbxa2r	1.15e-08	-0.10444	0.045	0.073	0.000206
Irak2	1.17e-08	0.110972	0.192	0.143	0.00021
Vps13a	1.18e-08	-0.15831	0.167	0.211	0.000212
Nanp	1.19e-08	-0.05307	0.009	0.025	0.000213
Skida1	1.21e-08	-0.03483	0.003	0.014	0.000217
Strbp	1.21e-08	-0.12829	0.079	0.115	0.000217
Mplkip	1.22e-08	-0.1266	0.146	0.192	0.000218
Trim12c	1.27e-08	-0.13132	0.102	0.141	0.000227
Chfr	1.3e-08	-0.11175	0.076	0.111	0.000233
Trp53inp1	1.39e-08	0.163408	0.216	0.168	0.000249
Mrtfb	1.42e-08	-0.16806	0.475	0.522	0.000254
Morf4l1	1.47e-08	-0.11208	0.899	0.92	0.000263
Fkbp3	1.48e-08	-0.15376	0.435	0.482	0.000265
Tfb1m	1.48e-08	-0.04498	0.005	0.017	0.000265
Jcad	1.49e-08	-0.10475	0.89	0.918	0.000266
Tcea1	1.51e-08	-0.13861	0.519	0.565	0.00027
Tal1	1.51e-08	0.09347	0.141	0.099	0.000271
LTO1	1.52e-08	-0.09923	0.059	0.091	0.000273
Rpl15	1.55e-08	0.079603	0.987	0.985	0.000277
Rbm22	1.55e-08	-0.15435	0.326	0.378	0.000277
Pcp4l1	1.57e-08	-0.12578	0.912	0.92	0.000281
AW209491	1.57e-08	-0.09199	0.032	0.056	0.000281
Ptprb	1.59e-08	0.093621	0.983	0.965	0.000285
Bambi	1.6e-08	0.143984	0.205	0.156	0.000287
Snrpe	1.65e-08	-0.14461	0.549	0.588	0.000296
Zfp81	1.73e-08	-0.08496	0.025	0.047	0.00031
Ccdc152	1.75e-08	-0.10669	0.068	0.102	0.000314
Ogt	1.84e-08	-0.13705	0.242	0.294	0.000329
Mal	1.89e-08	0.158863	0.864	0.838	0.000339
Cstf3	2.01e-08	0.10146	0.128	0.088	0.00036
Tspyl1	2.02e-08	-0.12637	0.13	0.173	0.000361
Birc3	2.04e-08	0.085815	0.086	0.054	0.000365
Egln1	2.05e-08	0.133213	0.469	0.406	0.000368
Chka	2.06e-08	0.146875	0.287	0.234	0.000369
Zfp952	2.06e-08	-0.09356	0.034	0.059	0.000369
Resf1	2.09e-08	-0.13839	0.136	0.18	0.000375
Txn1	2.1e-08	-0.11603	0.734	0.759	0.000376
Rbbp8	2.15e-08	0.094423	0.109	0.072	0.000386
Ywhae	2.19e-08	-0.11287	0.843	0.861	0.000392
Ccdc137	2.21e-08	-0.09201	0.059	0.091	0.000396
Mrpl49	2.28e-08	-0.1141	0.09	0.127	0.000408
Rpn1	2.28e-08	-0.15988	0.265	0.313	0.000409
2810004N23Rik	2.32e-08	-0.15692	0.118	0.158	0.000416
Rbpj	2.32e-08	-0.1491	0.225	0.273	0.000416
Calhm2	2.44e-08	-0.07446	0.019	0.039	0.000438
Arhgef15	2.46e-08	-0.15362	0.258	0.308	0.000442
Lsm10	2.56e-08	-0.1006	0.066	0.099	0.000458
Ctdspl2	2.62e-08	-0.15503	0.188	0.233	0.000469
Gm26917	2.65e-08	-0.11913	0.07	0.103	0.000474
Tmem250-ps	2.7e-08	-0.11593	0.065	0.097	0.000483
Gimap9	2.7e-08	-0.12339	0.086	0.122	0.000484
Mphosph10	2.75e-08	-0.14808	0.111	0.149	0.000493
Mrps16	2.75e-08	-0.13486	0.216	0.265	0.000494
Cyth3	2.76e-08	-0.15526	0.469	0.517	0.000495
Snhg8	2.76e-08	0.155706	0.416	0.354	0.000495
Zbtb21	2.82e-08	0.079846	0.092	0.058	0.000504
Ndufa5	2.83e-08	-0.14302	0.521	0.561	0.000507
Hsp90ab1	2.96e-08	-0.08376	0.994	0.994	0.000531
Trim16	2.99e-08	0.180721	0.289	0.239	0.000537
Micall2	3.03e-08	0.063412	0.045	0.022	0.000543
Rprd1a	3.05e-08	-0.11177	0.053	0.083	0.000547
Safb	3.08e-08	-0.14378	0.234	0.287	0.000552
Serbp1	3.47e-08	-0.13497	0.797	0.816	0.000622
Nudt16l1	3.54e-08	-0.09726	0.05	0.079	0.000635
Ndufa6	3.65e-08	0.117585	0.725	0.672	0.000654
Hbb-bt	3.67e-08	-0.3646	0.001	0.009	0.000658
Park7	3.73e-08	-0.12623	0.654	0.699	0.000668
Uqcr10	3.78e-08	-0.13433	0.653	0.686	0.000677
mt-Co1	3.79e-08	0.074203	0.998	0.997	0.000679
Zbtb26	3.82e-08	-0.06565	0.013	0.03	0.000685
Oaz1	3.87e-08	0.102774	0.91	0.883	0.000694
Klf10	3.91e-08	0.130973	0.24	0.19	0.000701
Dguok	3.97e-08	-0.15592	0.174	0.217	0.000712
Zcchc9	4.01e-08	-0.14738	0.16	0.203	0.000718
Irf2bpl	4.01e-08	0.124672	0.59	0.536	0.000718
Vapa	4.02e-08	0.148532	0.585	0.526	0.00072
Mrpl44	4.12e-08	-0.11734	0.069	0.101	0.000738
Gm15998	4.15e-08	-0.09124	0.055	0.086	0.000743
Golph3	4.15e-08	0.109571	0.229	0.179	0.000743
Asap2	4.66e-08	-0.11404	0.072	0.105	0.000835
Atp5g2	4.84e-08	-0.1317	0.769	0.786	0.000868
Hrct1	4.9e-08	-0.16637	0.173	0.217	0.000877
Slco1c1	4.91e-08	-0.11101	0.964	0.97	0.000879
E2f7	5.05e-08	0.051015	0.028	0.011	0.000905
Atp13a2	5.06e-08	-0.08205	0.033	0.056	0.000906
Use1	5.2e-08	0.140188	0.38	0.322	0.000932
3830406C13Rik	5.23e-08	-0.11463	0.113	0.152	0.000937
Tmem251	5.26e-08	0.08997	0.086	0.055	0.000942
B230219D22Rik	5.34e-08	-0.13058	0.661	0.702	0.000957
Clk3	5.36e-08	0.106515	0.127	0.089	0.000961
Cbx6	5.48e-08	-0.11529	0.097	0.133	0.000983
Gga3	5.49e-08	-0.06287	0.02	0.04	0.000984
Rbms1	5.58e-08	0.122175	0.712	0.661	0.000999
AI597479	5.59e-08	-0.06089	0.024	0.046	0.001001
Arl16	5.71e-08	-0.08093	0.03	0.053	0.001023
Capza1	5.93e-08	-0.14652	0.225	0.272	0.001063
D430040D24Rik	6.05e-08	0.068724	0.055	0.03	0.001084
Mfsd14a	6.27e-08	-0.15369	0.235	0.282	0.001124
Exosc4	6.3e-08	-0.13824	0.128	0.167	0.001128
Nckap5l	6.5e-08	0.092599	0.09	0.058	0.001165
Fadd	6.58e-08	-0.07914	0.025	0.047	0.00118
Usp50	6.82e-08	-0.07572	0.029	0.052	0.001223
Tomm20	6.84e-08	0.137096	0.502	0.443	0.001225
Brf2	6.89e-08	-0.06903	0.02	0.04	0.001235
Ch25h	7.35e-08	0.075713	0.03	0.012	0.001317
Rps7	7.38e-08	0.086124	0.991	0.989	0.001322
1810037I17Rik	7.63e-08	-0.11788	0.828	0.849	0.001367
S1pr4	7.72e-08	-0.13305	0.076	0.108	0.001384
Ino80b	7.74e-08	-0.16643	0.215	0.259	0.001387
Gab1	7.8e-08	0.134194	0.248	0.197	0.001397
Rpl29	7.9e-08	0.084393	0.962	0.948	0.001415
Lgals3bp	7.92e-08	-0.14688	0.161	0.203	0.001419
Gatad1	8.06e-08	-0.15071	0.297	0.346	0.001444
Ppp2ca	8.11e-08	0.120867	0.513	0.453	0.001453
Zdhhc20	8.32e-08	0.132523	0.292	0.238	0.00149
Zfp72	8.45e-08	-0.05106	0.011	0.027	0.001515
Nkd1	8.58e-08	0.141764	0.609	0.547	0.001537
Rab14	9.12e-08	-0.1402	0.712	0.744	0.001635
Zfp729b	9.31e-08	-0.08633	0.037	0.062	0.001668
Bcam	9.65e-08	-0.14861	0.532	0.57	0.001729
Gtf3c5	9.9e-08	-0.07063	0.037	0.062	0.001774
Tpgs2	1.01e-07	-0.12983	0.13	0.17	0.00181
Rps8	1.01e-07	0.059755	0.999	0.999	0.001813
Oip5os1	1.02e-07	-0.13953	0.527	0.562	0.001836
Lrrc59	1.05e-07	0.100246	0.151	0.11	0.001879
Fus	1.05e-07	0.124607	0.647	0.593	0.00188
Atp5mpl	1.05e-07	-0.14191	0.487	0.528	0.001881
Rnpepl1	1.06e-07	-0.14223	0.251	0.295	0.0019
Ccnj	1.09e-07	-0.05336	0.01	0.025	0.001956
Tubb6	1.1e-07	0.063566	0.032	0.014	0.001967
Sh3bp5	1.1e-07	0.113794	0.153	0.113	0.001973
Zfp771	1.12e-07	-0.14817	0.258	0.305	0.001998
4833420G17Rik	1.14e-07	-0.12608	0.096	0.132	0.002043
Cbll1	1.17e-07	-0.13745	0.112	0.149	0.002098
Uqcrh	1.18e-07	0.091666	0.876	0.846	0.002115
Gfer	1.2e-07	-0.10099	0.054	0.082	0.002152
3010003L21Rik	1.21e-07	0.061943	0.037	0.017	0.002169
Tlnrd1	1.21e-07	0.128965	0.215	0.169	0.00217
Vps4a	1.23e-07	-0.12764	0.164	0.206	0.002212
Srp9	1.24e-07	0.109861	0.559	0.498	0.002218
Dbi	1.27e-07	-0.129	0.589	0.625	0.002278
Gid8	1.28e-07	-0.12344	0.103	0.138	0.002295
Zmym1	1.36e-07	-0.068	0.022	0.042	0.002433
Hist3h2a	1.36e-07	-0.1496	0.117	0.154	0.002434
Milr1	1.4e-07	0.095626	0.075	0.047	0.002502
Dennd6a	1.42e-07	-0.13819	0.252	0.299	0.00254
Efnb1	1.43e-07	0.127448	0.168	0.126	0.002555
Arhgap5	1.44e-07	-0.15189	0.378	0.426	0.002584
Ddx39b	1.49e-07	-0.13618	0.291	0.339	0.002676
Dtwd1	1.55e-07	-0.06874	0.014	0.031	0.002775
Crim1	1.56e-07	0.138342	0.426	0.368	0.002794
Klhl24	1.57e-07	-0.15295	0.302	0.344	0.002807
A430033K04Rik	1.59e-07	-0.06106	0.015	0.031	0.002854
Ndufb3	1.6e-07	-0.1399	0.519	0.558	0.002866
Lmo2	1.61e-07	0.123438	0.812	0.777	0.002877
Zbtb45	1.61e-07	-0.06996	0.027	0.048	0.00288
D030056L22Rik	1.62e-07	-0.11669	0.095	0.13	0.002898
Ndufaf4	1.62e-07	-0.12605	0.124	0.162	0.002911
Nus1	1.64e-07	0.13766	0.241	0.193	0.002935
Yju2	1.64e-07	0.092391	0.093	0.062	0.002938
Mycbp2	1.64e-07	-0.15993	0.346	0.391	0.002941
Gm49359	1.66e-07	-0.10098	0.044	0.069	0.002982
Uqcr11	1.71e-07	-0.11234	0.78	0.802	0.003065
Tomm22	1.74e-07	-0.13455	0.316	0.36	0.003115
Sod1	1.75e-07	0.116951	0.623	0.568	0.003134
Hint3	1.77e-07	-0.13873	0.17	0.212	0.003175
Fut2	1.82e-07	0.031609	0.012	0.002	0.003268
Spc25	1.86e-07	0.030377	0.012	0.002	0.003331
Ptcd2	1.91e-07	-0.12383	0.108	0.145	0.003428
Zc3h12a	1.94e-07	0.059589	0.034	0.016	0.003469
Maoa	1.97e-07	0.124745	0.689	0.646	0.003529
Zfp207	1.97e-07	-0.13395	0.159	0.2	0.003537
Slfn3	2e-07	-0.07589	0.031	0.053	0.00359
Sptbn1	2.01e-07	0.090981	0.993	0.994	0.003603
Cdkn2aip	2.1e-07	0.155642	0.281	0.232	0.003763
Tnrc6b	2.12e-07	-0.14292	0.348	0.393	0.003794
Mrps24	2.29e-07	-0.14156	0.453	0.492	0.004095
Rab11fip1	2.29e-07	-0.17045	0.375	0.415	0.004095
Pigh	2.3e-07	-0.09612	0.041	0.065	0.00413
Rab20	2.34e-07	0.045475	0.019	0.006	0.004185
Sumo2	2.34e-07	-0.10505	0.82	0.842	0.004193
2310009A05Rik	2.35e-07	-0.13858	0.142	0.182	0.004207
Chac2	2.39e-07	-0.07818	0.038	0.063	0.004291
Zbtb6	2.41e-07	-0.07721	0.03	0.052	0.004322
Kctd21	2.42e-07	-0.02864	0.002	0.01	0.004328
Mrpl40	2.44e-07	-0.1037	0.083	0.117	0.004364
Twf2	2.48e-07	-0.1336	0.23	0.275	0.00445
Serinc1	2.5e-07	0.126154	0.539	0.486	0.004478
Rps15a	2.52e-07	0.068661	0.991	0.992	0.004514
Slc16a13	2.53e-07	0.076751	0.059	0.035	0.004528
Srp19	2.71e-07	-0.15135	0.342	0.388	0.004855
Adsl	2.77e-07	-0.09011	0.059	0.088	0.004959
Arih2	2.78e-07	0.095338	0.123	0.087	0.004985
Tspo	2.79e-07	-0.14131	0.645	0.684	0.005003
Ube2d2a	2.82e-07	0.123888	0.424	0.373	0.005055
Ppp1r15b	2.85e-07	0.10662	0.142	0.105	0.005109
Timm10b	2.92e-07	-0.14456	0.392	0.434	0.005231
Lima1	2.95e-07	-0.13333	0.436	0.482	0.005288
Mterf4	3e-07	-0.0667	0.03	0.052	0.005368
Avl9	3.08e-07	0.124185	0.239	0.193	0.005512
Pxn	3.12e-07	0.112224	0.268	0.217	0.005598
Fam89b	3.15e-07	-0.11499	0.092	0.126	0.005636
5730455P16Rik	3.17e-07	-0.08717	0.05	0.076	0.005676
Arl6ip5	3.17e-07	-0.1134	0.624	0.663	0.005686
Retreg1	3.19e-07	0.118413	0.199	0.155	0.005722
Gbp5	3.2e-07	-0.14505	0.209	0.252	0.005742
Ptpn21	3.21e-07	0.093227	0.107	0.074	0.005754
Sp2	3.23e-07	0.092052	0.101	0.069	0.00579
Sorbs1	3.3e-07	0.146752	0.467	0.418	0.005919
Foxq1	3.33e-07	0.151371	0.843	0.839	0.005969
Lef1	3.37e-07	-0.12954	0.8	0.829	0.006046
Sigirr	3.39e-07	-0.13653	0.191	0.233	0.006074
Gtf2a2	3.39e-07	0.118155	0.386	0.329	0.006079
Ttc14	3.39e-07	-0.13185	0.246	0.291	0.00608
Stub1	3.41e-07	-0.15478	0.363	0.405	0.006113
Ifngr2	3.44e-07	-0.10938	0.057	0.084	0.006163
Fubp1	3.46e-07	-0.14883	0.38	0.425	0.006195
Elf1	3.46e-07	0.135445	0.467	0.411	0.006198
Zfp605	3.53e-07	-0.05083	0.012	0.027	0.006327
Rbm39	3.66e-07	-0.0896	0.911	0.926	0.006562
Klf16	3.69e-07	0.07264	0.069	0.043	0.006615
Dubr	3.71e-07	-0.08808	0.055	0.083	0.006642
Spsb2	3.9e-07	0.108515	0.126	0.091	0.006981
Gm4070	3.95e-07	-0.11035	0.087	0.119	0.007081
Cgas	3.98e-07	-0.04877	0.013	0.029	0.007139
4632427E13Rik	4.02e-07	0.11353	0.198	0.155	0.007201
Rad52	4.03e-07	-0.05597	0.016	0.032	0.007226
Eftud2	4.09e-07	0.111279	0.345	0.291	0.007336
Ndnf	4.17e-07	0.120449	0.479	0.421	0.00747
Ccdc127	4.17e-07	-0.1152	0.183	0.225	0.007479
Gm14966	4.24e-07	-0.07106	0.03	0.052	0.007593
Cmpk2	4.46e-07	-0.13879	0.121	0.157	0.008001
Prkrip1	4.55e-07	-0.10853	0.106	0.141	0.008152
Rfesd	4.59e-07	-0.07601	0.038	0.061	0.008227
Pdzd2	4.65e-07	-0.12182	0.14	0.179	0.00833
Swap70	4.66e-07	0.117981	0.43	0.374	0.00835
Gnl3l	4.75e-07	-0.12791	0.118	0.154	0.008519
Rpa3	4.76e-07	-0.13613	0.129	0.165	0.00853
Cx3cl1	4.83e-07	0.127546	0.232	0.187	0.008654
Zbtb16	4.83e-07	0.06816	0.076	0.048	0.008655
Azin1	4.93e-07	0.122414	0.172	0.132	0.008835
Bmyc	4.94e-07	-0.1253	0.205	0.246	0.008844
Atf7ip	4.97e-07	-0.16238	0.191	0.231	0.008913
Gas5	4.98e-07	0.122749	0.671	0.615	0.008929
Ncoa3	4.99e-07	-0.14237	0.188	0.229	0.008945
Mpzl1	5.1e-07	0.109247	0.694	0.632	0.009135
Rnf135	5.14e-07	-0.05892	0.019	0.036	0.009212
Prpf6	5.25e-07	-0.15674	0.195	0.233	0.009409
2900026A02Rik	5.47e-07	0.109613	0.467	0.407	0.009804
Zcrb1	5.48e-07	0.12799	0.568	0.51	0.009826
Ap1s2	5.63e-07	-0.15999	0.4	0.44	0.010088
Chordc1	5.64e-07	-0.12404	0.261	0.306	0.010099
Sf3b5	5.78e-07	-0.13617	0.304	0.348	0.010349
Tfap4	5.81e-07	-0.05501	0.013	0.028	0.010403
Rhob	5.88e-07	0.090263	0.944	0.92	0.010538
Taf15	5.97e-07	-0.12307	0.253	0.298	0.01069
Cthrc1	6.06e-07	-0.13949	0.09	0.122	0.01086
Ralbp1	6.13e-07	-0.14707	0.652	0.69	0.010992
Lix1l	6.23e-07	-0.10959	0.092	0.125	0.011162
Gpbp1l1	6.31e-07	-0.1221	0.232	0.275	0.011301
Syne1	6.34e-07	-0.12206	0.588	0.632	0.011355
Bmf	6.37e-07	-0.03949	0.006	0.018	0.011421
Glul	6.43e-07	-0.20933	0.748	0.765	0.011524
Numb	6.5e-07	-0.12272	0.176	0.216	0.011655
1810058I24Rik	6.63e-07	-0.13931	0.294	0.335	0.011883
Kbtbd11	6.64e-07	-0.14903	0.191	0.232	0.011893
Stap2	6.7e-07	-0.14486	0.221	0.262	0.011998
Pfn1	6.71e-07	-0.13153	0.717	0.728	0.012029
Commd6	6.84e-07	-0.12734	0.21	0.253	0.012263
Luc7l2	6.91e-07	0.103192	0.599	0.544	0.012375
Cav2	7e-07	-0.13094	0.694	0.713	0.01255
Phc2	7.06e-07	0.141241	0.344	0.294	0.012659
Bub3	7.1e-07	-0.13906	0.3	0.344	0.012725
Zup1	7.24e-07	-0.11921	0.079	0.109	0.012975
Rpl11	7.25e-07	0.06997	0.983	0.981	0.012987
Zfp866	7.63e-07	-0.05807	0.024	0.043	0.013678
Car4	7.67e-07	0.089912	0.922	0.86	0.013737
Trmt13	7.67e-07	-0.1048	0.069	0.098	0.013748
Pias4	7.88e-07	-0.09062	0.066	0.095	0.01413
Chst15	7.94e-07	0.083802	0.082	0.054	0.014228
B230354K17Rik	7.96e-07	-0.06154	0.016	0.032	0.014263
Rtp3	7.98e-07	-0.0684	0.021	0.038	0.014309
Dctn5	8e-07	-0.12011	0.093	0.125	0.014333
Zfp189	8.08e-07	-0.05745	0.015	0.03	0.014487
Pik3ip1	8.27e-07	-0.17275	0.398	0.437	0.014817
Sh3bp4	8.4e-07	0.119633	0.286	0.237	0.015059
Dnajb6	8.41e-07	0.126983	0.595	0.551	0.015072
Klhl6	8.6e-07	-0.12414	0.139	0.175	0.015407
Exog	8.62e-07	-0.04956	0.01	0.023	0.015442
Gm14305	8.63e-07	-0.06842	0.032	0.054	0.015472
Tex261	8.69e-07	-0.14263	0.252	0.294	0.015566
Rcn2	8.76e-07	0.102034	0.332	0.278	0.015698
Nbr1	8.84e-07	-0.13774	0.208	0.248	0.015843
Ifi27	8.89e-07	0.115598	0.714	0.669	0.01593
Rab10os	8.89e-07	0.082754	0.09	0.061	0.015937
Tardbp	9.09e-07	-0.13604	0.237	0.28	0.016281
Esco1	9.12e-07	-0.13452	0.169	0.209	0.016335
Gm11361	9.2e-07	-0.05486	0.011	0.024	0.016494
Uqcc3	9.33e-07	-0.12167	0.304	0.348	0.016725
5033430I15Rik	9.44e-07	0.052146	0.036	0.018	0.016925
Tmem256	9.79e-07	-0.14274	0.418	0.451	0.017544
Cetn2	9.99e-07	-0.14987	0.311	0.351	0.017899
Zfp950	1.01e-06	-0.14548	0.155	0.193	0.018039
Frg1	1.02e-06	-0.14279	0.232	0.275	0.018296
Mysm1	1.04e-06	-0.15561	0.207	0.247	0.018646
Hyal2	1.04e-06	-0.09875	0.103	0.137	0.018714
Rpl18	1.05e-06	0.079115	0.983	0.973	0.018859
Fam57a	1.06e-06	-0.0748	0.032	0.053	0.018927
Pf4	1.06e-06	-0.01689	0	0.005	0.019039
Zfp287	1.08e-06	-0.06286	0.017	0.033	0.019371
Srek1	1.09e-06	-0.13068	0.221	0.262	0.019553
Stx16	1.13e-06	-0.11688	0.18	0.22	0.020203
1110038B12Rik	1.14e-06	-0.09596	0.071	0.099	0.020342
Net1	1.14e-06	0.128855	0.548	0.489	0.02042
Cbx2	1.15e-06	-0.02977	0.003	0.012	0.020629
Adam10	1.16e-06	-0.13395	0.543	0.574	0.020874
Morf4l2	1.19e-06	0.125509	0.311	0.261	0.021265
Akirin1	1.19e-06	0.095911	0.26	0.211	0.021413
Nbl1	1.21e-06	0.066946	0.049	0.028	0.021597
Eif3e	1.23e-06	0.126883	0.613	0.574	0.021971
Lnx2	1.23e-06	-0.12974	0.178	0.216	0.022115
Ccdc32	1.24e-06	-0.1245	0.13	0.166	0.022173
Ifnar2	1.25e-06	-0.12309	0.731	0.746	0.022314
Pde4d	1.26e-06	0.064279	0.048	0.027	0.022499
Exosc7	1.26e-06	-0.13221	0.166	0.205	0.022521
Pycr2	1.3e-06	-0.10811	0.149	0.187	0.02326
Gm20559	1.31e-06	-0.10639	0.075	0.104	0.023422
Foxo3	1.31e-06	0.102753	0.135	0.101	0.023425
Hectd1	1.33e-06	0.108297	0.558	0.505	0.023853
Chrac1	1.34e-06	0.091782	0.332	0.276	0.024074
Marcks	1.35e-06	-0.11234	0.156	0.195	0.024248
Chtf8	1.36e-06	-0.05096	0.021	0.038	0.024286
Exosc1	1.36e-06	-0.09392	0.093	0.125	0.024356
Klhl20	1.37e-06	-0.08831	0.065	0.093	0.024632
Plec	1.38e-06	-0.15329	0.268	0.308	0.024795
Nip7	1.4e-06	-0.09684	0.085	0.116	0.02505
Pdcd4	1.41e-06	-0.12932	0.24	0.282	0.025239
Herc4	1.42e-06	-0.11894	0.11	0.144	0.025502
Phc1	1.46e-06	0.108248	0.152	0.115	0.026081
Ggnbp2	1.46e-06	0.11769	0.312	0.264	0.026147
Unc50	1.46e-06	-0.12157	0.351	0.396	0.026192
Ptma	1.57e-06	0.055361	0.998	0.996	0.028065
Ndufv1	1.58e-06	0.10094	0.346	0.291	0.028335
Mark4	1.58e-06	0.076354	0.111	0.079	0.028344
Rflnb	1.58e-06	0.111003	0.551	0.487	0.028364
Arhgef3	1.61e-06	-0.13666	0.191	0.229	0.028768
Malt1	1.64e-06	0.105321	0.114	0.082	0.029329
4932438A13Rik	1.68e-06	-0.14696	0.213	0.253	0.030054
Nipal2	1.68e-06	-0.03169	0.003	0.012	0.030123
Trim12a	1.74e-06	-0.12577	0.133	0.168	0.031164
Srek1ip1	1.74e-06	-0.11376	0.104	0.137	0.031199
E430024I08Rik	1.76e-06	-0.05167	0.013	0.027	0.031554
Rpl36al	1.76e-06	-0.11236	0.678	0.707	0.03158
Xbp1	1.77e-06	-0.13632	0.297	0.337	0.031779
Tmem246	1.78e-06	-0.07028	0.038	0.06	0.031809
Shoc2	1.79e-06	-0.14488	0.292	0.333	0.032066
Wdr76	1.8e-06	-0.09059	0.034	0.055	0.032317
Extl3	1.81e-06	-0.14047	0.364	0.403	0.032461
A630072M18Rik	1.82e-06	0.092892	0.136	0.101	0.032598
Syncrip	1.82e-06	0.117137	0.233	0.191	0.032619
Gbp7	1.84e-06	-0.17717	0.383	0.423	0.032963
Med8	1.84e-06	-0.1318	0.148	0.185	0.033037
Rad1	1.88e-06	-0.08255	0.04	0.062	0.033731
Slc22a8	1.89e-06	0.094965	0.777	0.727	0.033889
Mterf1a	1.92e-06	-0.07004	0.019	0.036	0.034328
Pinx1	1.96e-06	-0.09154	0.046	0.07	0.035075
Epn2	1.97e-06	-0.1501	0.461	0.497	0.035332
Mex3b	1.97e-06	-0.0455	0.014	0.029	0.035385
Ackr3	1.98e-06	0.154182	0.318	0.268	0.0355
Zfp120	2.01e-06	-0.07356	0.029	0.049	0.036054
Pkn2	2.03e-06	-0.14177	0.496	0.535	0.036292
Slc25a40	2.08e-06	-0.0912	0.056	0.081	0.03728
Tmem101	2.11e-06	-0.08408	0.053	0.078	0.037797
Atad2b	2.11e-06	-0.1308	0.14	0.176	0.037813
Prkaca	2.14e-06	-0.10569	0.099	0.13	0.038405
Guf1	2.15e-06	-0.09138	0.06	0.086	0.038543
Mrps9	2.19e-06	-0.11487	0.097	0.128	0.039324
Stat2	2.2e-06	-0.12826	0.116	0.149	0.039459
Shb	2.24e-06	0.082071	0.091	0.063	0.040153
Paxbp1	2.24e-06	-0.11494	0.144	0.18	0.040222
Hjurp	2.27e-06	-0.10404	0.081	0.111	0.040695
Lyn	2.31e-06	-0.15882	0.242	0.28	0.041395
Ccdc186	2.42e-06	-0.14044	0.225	0.267	0.043278
Rnaset2b	2.42e-06	-0.09875	0.511	0.562	0.043392
Orc6	2.43e-06	-0.10667	0.087	0.117	0.043473
Psmb5	2.43e-06	-0.12641	0.459	0.497	0.043512
Rcan2	2.44e-06	0.096447	0.121	0.089	0.043813
Zfp101	2.46e-06	-0.07889	0.027	0.046	0.04404
Gm32031	2.59e-06	0.059198	0.062	0.039	0.04641
Msl3	2.59e-06	-0.11842	0.121	0.155	0.046492
Dnttip2	2.61e-06	0.081762	0.329	0.275	0.046727
Rpl31	2.62e-06	0.084376	0.894	0.872	0.047028
Nhp2	2.63e-06	-0.10196	0.093	0.124	0.04718
Efna1	2.64e-06	-0.12132	0.117	0.15	0.047314
Zfp729a	2.66e-06	-0.07792	0.032	0.052	0.047699
Coro1c	2.69e-06	0.081327	0.15	0.114	0.048211
Zfp994	2.7e-06	-0.08165	0.042	0.064	0.048365
Mxd1	2.76e-06	0.063556	0.086	0.058	0.04941
Snx16	2.8e-06	-0.08647	0.068	0.096	0.050248
Ammecr1l	2.82e-06	0.078946	0.102	0.072	0.050514
Clk1	2.84e-06	-0.11558	0.604	0.634	0.050921
Zfp553	2.92e-06	-0.06191	0.022	0.04	0.052396
Eapp	2.93e-06	-0.13007	0.316	0.358	0.052429
Arpc2	2.98e-06	0.091849	0.812	0.784	0.053428
Cebpzos	2.99e-06	-0.13432	0.164	0.2	0.053547
Hspe1	3.01e-06	-0.13736	0.349	0.388	0.053988
Stx12	3.02e-06	0.113747	0.539	0.49	0.054109
Zfp64	3.06e-06	0.070601	0.057	0.035	0.054771
Tsfm	3.08e-06	-0.09799	0.084	0.113	0.055106
Rpl36	3.12e-06	-0.06515	0.992	0.994	0.055877
Zbtb46	3.12e-06	-0.12107	0.134	0.169	0.055976
Imp3	3.14e-06	-0.13314	0.31	0.357	0.056214
Pgam1	3.14e-06	-0.12487	0.33	0.369	0.056322
Ino80d	3.15e-06	-0.12922	0.231	0.271	0.056497
Ubl5	3.2e-06	-0.10324	0.777	0.783	0.05742
Hspd1	3.22e-06	-0.12823	0.338	0.379	0.057689
Camkk2	3.23e-06	-0.06754	0.041	0.064	0.057861
Ripk1	3.23e-06	0.098	0.211	0.169	0.057946
Fahd1	3.3e-06	-0.06537	0.033	0.054	0.059146
Timm10	3.35e-06	-0.08354	0.06	0.086	0.059978
Tefm	3.44e-06	-0.03992	0.01	0.022	0.061633
Ppfibp1	3.48e-06	-0.12882	0.561	0.588	0.062363
Rnf4	3.51e-06	0.090089	0.175	0.136	0.062988
Zfp111	3.53e-06	-0.05183	0.016	0.031	0.063341
G3bp1	3.58e-06	-0.13417	0.377	0.414	0.064081
Tpi1	3.67e-06	-0.13626	0.416	0.456	0.0657
Rrs1	3.75e-06	-0.09388	0.066	0.093	0.067204
Ppp1r12a	3.8e-06	0.110154	0.447	0.399	0.068159
Fastkd1	3.82e-06	-0.06988	0.029	0.048	0.068494
Atp6v0b	3.82e-06	-0.12274	0.573	0.602	0.068522
Svil	3.9e-06	-0.14176	0.255	0.296	0.06994
Zfp65	3.91e-06	-0.05517	0.02	0.036	0.07009
Cd2ap	3.92e-06	-0.11305	0.823	0.843	0.070262
Pecam1	3.94e-06	0.088387	0.889	0.872	0.07068
Tmem30a	3.95e-06	-0.10621	0.507	0.541	0.07074
Vstm2b	3.97e-06	0.100768	0.107	0.077	0.071106
Cfl2	3.98e-06	-0.12697	0.317	0.357	0.071398
1810055G02Rik	4.04e-06	0.032252	0.014	0.004	0.072341
Ciao1	4.11e-06	-0.09698	0.122	0.156	0.073624
Mrps36	4.16e-06	-0.12308	0.165	0.201	0.07459
Ttyh2	4.17e-06	-0.14735	0.239	0.277	0.074816
Plekhf2	4.21e-06	0.094489	0.226	0.185	0.07546
Papolg	4.22e-06	-0.07335	0.033	0.053	0.075599
Hspa12b	4.27e-06	-0.13761	0.343	0.382	0.0765
Ehd2	4.28e-06	-0.13365	0.229	0.265	0.076749
Eif3c	4.28e-06	-0.11854	0.582	0.617	0.076768
Gm17501	4.3e-06	0.064609	0.068	0.044	0.076988
Stx2	4.32e-06	-0.09791	0.057	0.082	0.0774
Med13l	4.33e-06	0.117759	0.249	0.207	0.077629
Pdlim5	4.4e-06	0.101607	0.425	0.37	0.078821
Irf2	4.41e-06	-0.13895	0.494	0.527	0.078939
Ccni	4.41e-06	0.10925	0.339	0.292	0.079063
Nynrin	4.46e-06	-0.09285	0.058	0.083	0.079884
Rpl8	4.46e-06	0.065951	0.987	0.988	0.079942
Plcb3	4.63e-06	-0.11597	0.1	0.13	0.083041
Platr25	4.66e-06	-0.05356	0.018	0.033	0.083466
Gtpbp8	4.67e-06	-0.06819	0.05	0.073	0.083646
Isyna1	4.76e-06	-0.11187	0.552	0.597	0.08526
Pfdn5	4.78e-06	0.086466	0.911	0.896	0.085646
Ndufv3	4.79e-06	-0.13293	0.455	0.492	0.085775
Fbrs	4.91e-06	0.079252	0.125	0.093	0.088038
Gm20939	4.93e-06	-0.03141	0.005	0.015	0.088372
Mrpl32	4.93e-06	-0.11228	0.158	0.195	0.088407
Cox6b1	4.95e-06	-0.09906	0.819	0.844	0.088671
Pvr	5.01e-06	0.08741	0.13	0.098	0.089692
Med18	5.04e-06	-0.03493	0.007	0.017	0.090227
Golga3	5.08e-06	-0.11462	0.09	0.119	0.090993
Suz12	5.09e-06	0.112586	0.325	0.277	0.09115
Uqcrb	5.22e-06	-0.08658	0.865	0.871	0.093547
Sirt5	5.27e-06	-0.0674	0.038	0.059	0.094406
Atp23	5.29e-06	-0.041	0.009	0.021	0.094755
Ap4e1	5.34e-06	-0.06285	0.029	0.048	0.095623
Wnk1	5.39e-06	0.11056	0.506	0.455	0.09654
Dennd3	5.4e-06	0.114415	0.25	0.206	0.096849
Capn15	5.42e-06	-0.09267	0.071	0.098	0.097066
Brat1	5.42e-06	-0.04668	0.016	0.03	0.097207
Ctsl	5.43e-06	0.104533	0.706	0.66	0.09722
Atp5g3	5.44e-06	-0.11421	0.476	0.51	0.097566
Mtf1	5.45e-06	0.084392	0.129	0.097	0.097699
Zfp608	5.46e-06	-0.1221	0.116	0.148	0.097804
Zfp791	5.47e-06	-0.02917	0.003	0.01	0.098067
Rpl36a-ps1	5.49e-06	0.060287	0.059	0.037	0.098334
Pde7b	5.49e-06	0.092467	0.096	0.068	0.09835
Nagk	5.58e-06	-0.0884	0.087	0.117	0.099921
Cpne8	5.61e-06	-0.12781	0.247	0.285	0.100453
Rpl35a	5.64e-06	0.051256	0.997	0.998	0.101
Tdrp	5.77e-06	-0.13506	0.545	0.575	0.103361
Caml	5.88e-06	-0.13486	0.249	0.287	0.105383
Uqcrfs1	5.92e-06	0.120881	0.398	0.351	0.106053
Cacybp	5.95e-06	-0.14093	0.328	0.366	0.106587
Ttf1	5.95e-06	-0.10724	0.089	0.118	0.106709
Zbtb22	6.08e-06	0.062664	0.087	0.06	0.10887
Trmt5	6.09e-06	-0.03787	0.008	0.018	0.109155
Serf2	6.21e-06	-0.08949	0.916	0.925	0.11136
Ttc4	6.25e-06	-0.10516	0.125	0.159	0.111981
Gpatch11	6.36e-06	-0.1109	0.122	0.155	0.113916
Tma7	6.39e-06	-0.12045	0.589	0.606	0.114476
Rras	6.43e-06	-0.11739	0.67	0.688	0.115265
Trp53rka	6.52e-06	-0.08435	0.067	0.093	0.116862
Pmepa1	6.58e-06	-0.13508	0.479	0.518	0.117877
Gm28731	6.6e-06	0.04044	0.02	0.008	0.118336
Vps4b	6.61e-06	-0.14369	0.289	0.325	0.118525
Pms2	6.62e-06	-0.07339	0.04	0.062	0.118626
Lrrc32	6.77e-06	0.052	0.03	0.015	0.121388
Coil	6.78e-06	-0.05194	0.017	0.032	0.121523
Nid2	6.83e-06	0.085105	0.121	0.091	0.122418
Rnf181	6.9e-06	-0.11145	0.124	0.157	0.123586
Atp2c1	6.98e-06	-0.13782	0.324	0.361	0.125148
Rbm14	6.99e-06	-0.07658	0.047	0.069	0.125325
Dstn	7.04e-06	-0.08617	0.828	0.842	0.126073
Cep70	7.07e-06	-0.09023	0.071	0.097	0.126769
Tor1aip1	7.14e-06	0.107573	0.403	0.355	0.12796
Smim15	7.38e-06	-0.10955	0.214	0.255	0.132273
Ndufb4	7.4e-06	-0.10602	0.595	0.627	0.132661
Klf2	7.41e-06	0.072365	0.996	0.997	0.132787
Gm10575	7.56e-06	0.07149	0.072	0.049	0.135497
Gng5	7.57e-06	-0.07168	0.974	0.975	0.135703
Cenpx	7.66e-06	-0.12103	0.378	0.419	0.13722
Itga1	7.67e-06	-0.12069	0.732	0.755	0.137436
Arl5b	7.67e-06	0.087141	0.142	0.108	0.137458
Cuta	7.75e-06	-0.13484	0.382	0.42	0.138915
Smim12	7.76e-06	-0.11793	0.148	0.182	0.139108
Pstk	7.8e-06	-0.08753	0.069	0.095	0.139847
Ranbp9	7.92e-06	0.091285	0.217	0.176	0.141976
Lig1	7.94e-06	-0.10598	0.07	0.096	0.142279
Ifit3b	8.03e-06	-0.0854	0.055	0.079	0.143853
Zdhhc6	8.03e-06	-0.08612	0.067	0.092	0.143982
Oaz2	8.06e-06	0.105185	0.27	0.226	0.144378
Hnrnpa3	8.15e-06	0.101527	0.761	0.726	0.14606
Nat2	8.19e-06	-0.05237	0.012	0.024	0.146727
Tigd2	8.2e-06	-0.12487	0.117	0.148	0.146929
Tmem100	8.21e-06	-0.07849	0.012	0.025	0.14707
Ddit3	8.21e-06	0.082226	0.117	0.086	0.147211
Gfod1	8.27e-06	0.076449	0.122	0.091	0.148254
Amer2	8.32e-06	-0.0355	0.004	0.013	0.149143
Dnajb2	8.4e-06	-0.12141	0.145	0.178	0.150596
Slc16a1	8.42e-06	0.042509	0.624	0.562	0.150965
Ppdpf	8.52e-06	-0.14087	0.32	0.356	0.15259
Ldha	8.55e-06	-0.13217	0.685	0.71	0.153154
Gtf3a	8.6e-06	-0.10012	0.087	0.115	0.154101
Ube2h	8.6e-06	0.102618	0.323	0.276	0.154137
Gm5141	8.65e-06	-0.02959	0.007	0.017	0.154963
4833403J16Rik	8.67e-06	0.07058	0.076	0.052	0.155348
Atp6v1f	8.67e-06	-0.10598	0.648	0.674	0.155438
Snx6	8.7e-06	-0.13403	0.36	0.397	0.155981
Nr2c2ap	8.71e-06	-0.08735	0.064	0.089	0.156069
Dmac1	8.71e-06	-0.10444	0.145	0.179	0.156169
Fibp	8.83e-06	-0.12418	0.218	0.254	0.158148
Stat1	8.9e-06	-0.14584	0.229	0.265	0.159477
Mrpl41	8.94e-06	-0.1153	0.19	0.228	0.160151
Gm11696	9e-06	0.042397	0.025	0.012	0.16122
Eif2b4	9.08e-06	-0.10427	0.1	0.129	0.162728
Trmt1l	9.09e-06	-0.0903	0.067	0.092	0.162941
Adgra2	9.15e-06	-0.12809	0.287	0.326	0.164032
Rbm12b2	9.27e-06	-0.05191	0.018	0.032	0.166102
Cdc42se2	9.34e-06	-0.12027	0.229	0.268	0.167347
Elk4	9.43e-06	0.09449	0.291	0.245	0.169003
Rab5a	9.73e-06	0.097606	0.495	0.441	0.17441
Edrf1	9.77e-06	-0.06406	0.033	0.053	0.175068
Pdcd2l	9.91e-06	-0.08823	0.059	0.084	0.17766
Ppil3	9.99e-06	-0.07332	0.055	0.079	0.179002
Spag7	1e-05	0.082935	0.278	0.233	0.17916
Gm17103	1e-05	0.025015	0.01	0.002	0.179215
Exoc8	1e-05	-0.07085	0.038	0.059	0.179539
Selenok	1.01e-05	0.081875	0.914	0.896	0.180158
Il1r1	1.01e-05	-0.09616	0.041	0.061	0.180425
Pin4	1.01e-05	-0.10908	0.252	0.29	0.181025
Cpd	1.02e-05	0.104257	0.574	0.526	0.182605
Ccz1	1.02e-05	-0.12646	0.239	0.275	0.183108
Fra10ac1	1.04e-05	-0.10716	0.111	0.142	0.185509
Phospho2	1.04e-05	-0.0746	0.057	0.081	0.186133
Zfp637	1.04e-05	-0.08546	0.093	0.123	0.186892
H2-T23	1.04e-05	-0.11938	0.581	0.61	0.187057
Ssr1	1.05e-05	-0.13757	0.317	0.354	0.18742
Prelid1	1.06e-05	-0.13826	0.238	0.272	0.189628
Uba6	1.06e-05	-0.08346	0.058	0.083	0.189911
Bnip3l	1.06e-05	-0.10677	0.783	0.802	0.190573
Parp14	1.06e-05	-0.14484	0.175	0.209	0.190673
Gabarapl1	1.07e-05	-0.12306	0.381	0.417	0.190994
Efr3b	1.11e-05	-0.14491	0.384	0.423	0.199358
Gm16751	1.11e-05	0.055052	0.038	0.021	0.199804
Batf	1.12e-05	-0.03933	0.009	0.019	0.200521
Ifit1	1.13e-05	-0.15532	0.187	0.223	0.20181
Wbp1l	1.13e-05	0.089115	0.14	0.108	0.202146
Tm2d2	1.13e-05	-0.12898	0.28	0.315	0.203038
Neat1	1.15e-05	0.161116	0.444	0.401	0.205958
Armc10	1.18e-05	-0.09325	0.065	0.089	0.210873
Keap1	1.18e-05	-0.11686	0.195	0.232	0.211531
Zfp418	1.19e-05	-0.02105	0.001	0.007	0.212691
Sox7	1.21e-05	0.109459	0.204	0.166	0.216163
Atp10a	1.21e-05	-0.1029	0.571	0.61	0.216619
Ccdc174	1.22e-05	-0.1088	0.167	0.202	0.219192
Rpl19	1.24e-05	0.058353	0.992	0.994	0.221824
Ptrh2	1.24e-05	-0.06903	0.046	0.068	0.221919
Ctcf	1.24e-05	-0.13471	0.448	0.48	0.222107
Zbtb10	1.25e-05	0.079419	0.136	0.104	0.223816
Wdr61	1.26e-05	-0.12715	0.278	0.316	0.22583
Mrpl36	1.26e-05	-0.112	0.183	0.217	0.225862
Nol11	1.28e-05	-0.11426	0.111	0.14	0.229281
Bik	1.28e-05	0.058135	0.037	0.021	0.229604
Pus3	1.29e-05	-0.09244	0.045	0.066	0.230612
Ctnnbl1	1.3e-05	0.081025	0.166	0.13	0.232477
Msrb2	1.31e-05	-0.13194	0.212	0.248	0.234564
Zfp763	1.32e-05	-0.03998	0.012	0.025	0.235807
Nelfb	1.33e-05	-0.10661	0.142	0.176	0.237618
Zfp59	1.34e-05	-0.02778	0.003	0.011	0.239454
Hs3st1	1.34e-05	-0.1158	0.146	0.179	0.239511
Gnpda2	1.35e-05	-0.14228	0.181	0.214	0.241188
Tnks2	1.35e-05	-0.13502	0.28	0.318	0.241315
Palmd	1.38e-05	0.082701	0.883	0.863	0.246774
Rnf7	1.39e-05	-0.10382	0.505	0.539	0.248491
Mrpl19	1.42e-05	-0.08588	0.056	0.079	0.253736
Sdhaf1	1.42e-05	-0.11897	0.168	0.2	0.254253
Tec	1.42e-05	-0.09627	0.049	0.071	0.255141
Them4	1.42e-05	-0.06135	0.022	0.038	0.255346
Chd9	1.44e-05	-0.09787	0.084	0.111	0.258036
Mrpl22	1.45e-05	-0.09492	0.109	0.14	0.259328
Naxd	1.45e-05	-0.12772	0.194	0.228	0.259656
Mmgt1	1.46e-05	-0.07908	0.05	0.072	0.262366
Gm21887	1.47e-05	-0.03271	0.007	0.018	0.263126
Mrpl48	1.48e-05	-0.11479	0.212	0.249	0.264691
Rpsa	1.5e-05	0.056694	0.959	0.946	0.2682
Cebpd	1.5e-05	0.30809	0.516	0.489	0.268443
Qrich1	1.5e-05	0.086276	0.128	0.097	0.268514
Zfp449	1.5e-05	-0.05614	0.019	0.034	0.26959
Clip1	1.51e-05	0.113972	0.59	0.54	0.270861
Prkdc	1.52e-05	-0.07311	0.031	0.049	0.272704
4930523C07Rik	1.54e-05	0.138607	0.338	0.293	0.276165
Paip2b	1.58e-05	-0.08312	0.055	0.078	0.283927
Srsf9	1.59e-05	-0.10634	0.397	0.438	0.285352
Mrps12	1.62e-05	-0.11978	0.194	0.23	0.290264
9930021J03Rik	1.63e-05	0.090811	0.236	0.196	0.291949
Cdc23	1.63e-05	-0.08973	0.102	0.132	0.29262
Trim32	1.65e-05	-0.04756	0.019	0.034	0.295988
Zkscan3	1.65e-05	-0.13785	0.282	0.318	0.295999
Ndufa8	1.66e-05	-0.12043	0.413	0.448	0.296799
Mga	1.66e-05	-0.11747	0.173	0.208	0.29774
Med28	1.67e-05	-0.12371	0.399	0.434	0.299735
Kctd2	1.68e-05	-0.1066	0.152	0.186	0.300265
Rps24	1.71e-05	0.052121	0.997	0.998	0.306085
Snrpd3	1.71e-05	-0.11207	0.331	0.369	0.306404
Wtap	1.72e-05	-0.11096	0.214	0.252	0.308421
Ormdl2	1.72e-05	-0.0988	0.091	0.118	0.308937
Pibf1	1.74e-05	-0.08767	0.098	0.127	0.31159
Zswim4	1.74e-05	0.045484	0.036	0.02	0.311806
Map1b	1.76e-05	0.095167	0.137	0.106	0.314771
AU041133	1.76e-05	-0.04763	0.014	0.027	0.314916
Gm49097	1.76e-05	-0.05033	0.011	0.023	0.314984
Enpp2	1.76e-05	0.085101	0.166	0.132	0.315168
Carnmt1	1.76e-05	-0.0932	0.1	0.128	0.31533
Pcm1	1.78e-05	-0.13545	0.405	0.435	0.319309
Pex26	1.8e-05	-0.04116	0.014	0.026	0.323188
Tmem106b	1.82e-05	-0.11714	0.219	0.256	0.3259
Fam168a	1.82e-05	0.095599	0.165	0.131	0.326063
Ascc3	1.82e-05	-0.11523	0.184	0.219	0.326578
Lamtor4	1.85e-05	-0.11328	0.294	0.331	0.332088
Cldn5	1.85e-05	0.045	1	1	0.33218
Zfp809	1.86e-05	-0.06576	0.031	0.049	0.332781
Comt	1.86e-05	-0.12151	0.215	0.249	0.333793
Cib1	1.87e-05	-0.09697	0.163	0.199	0.334874
Mettl14	1.87e-05	-0.05828	0.036	0.055	0.335683
Aen	1.88e-05	-0.07568	0.057	0.08	0.336054
Cep95	1.88e-05	-0.04126	0.013	0.026	0.336249
Patz1	1.89e-05	-0.10322	0.095	0.123	0.338355
Pno1	1.89e-05	-0.07775	0.047	0.068	0.338585
Med11	1.9e-05	-0.06563	0.029	0.047	0.340809
A730049H05Rik	1.91e-05	0.023238	0.007	0.001	0.342112
Sh3bp5l	1.91e-05	-0.06571	0.028	0.045	0.342537
1110059E24Rik	1.92e-05	-0.11462	0.112	0.14	0.344171
Hyls1	1.92e-05	-0.02732	0.005	0.013	0.344349
Vwa1	1.92e-05	0.100697	0.962	0.951	0.344516
Ndufaf1	1.93e-05	-0.06811	0.032	0.051	0.346533
Polr2i	1.94e-05	-0.14225	0.24	0.272	0.348
Armc5	1.95e-05	0.060057	0.097	0.07	0.348768
Gbp4	1.98e-05	-0.12086	0.091	0.118	0.354416
Ro60	1.99e-05	-0.10289	0.275	0.314	0.356506
Myh9	2e-05	0.091806	0.758	0.717	0.357568
Dpy30	2.03e-05	-0.11823	0.234	0.27	0.363295
9130017K11Rik	2.08e-05	-0.03761	0.012	0.023	0.373463
Hsph1	2.09e-05	-0.09262	0.052	0.073	0.374671
Brd1	2.12e-05	-0.13529	0.352	0.385	0.380537
Polr3g	2.14e-05	-0.03269	0.007	0.016	0.383752
Fgfr1op	2.19e-05	-0.05151	0.03	0.047	0.391872
Ercc5	2.2e-05	0.094937	0.173	0.139	0.395107
Sirt7	2.21e-05	-0.13142	0.171	0.203	0.395706
Vgll4	2.21e-05	0.111276	0.316	0.273	0.396453
A4galt	2.23e-05	-0.11789	0.108	0.136	0.399319
Cox14	2.24e-05	-0.12082	0.336	0.37	0.400729
Tgtp1	2.24e-05	-0.05768	0.015	0.029	0.40101
Dtd2	2.24e-05	-0.10232	0.082	0.107	0.401952
Mrpl54	2.25e-05	0.068874	0.198	0.16	0.403531
Hcar1	2.25e-05	-0.01877	0.002	0.009	0.403816
Sde2	2.3e-05	0.080892	0.235	0.194	0.411435
Srfbp1	2.3e-05	-0.08509	0.06	0.082	0.411656
Ccdc82	2.31e-05	-0.14339	0.266	0.299	0.413804
Tmem41b	2.35e-05	0.071837	0.132	0.101	0.420905
Fut8	2.36e-05	-0.13871	0.476	0.507	0.422729
Denr	2.43e-05	-0.11395	0.329	0.367	0.436095
Bcl2l1	2.43e-05	0.101513	0.504	0.453	0.436308
Psmd8	2.44e-05	0.102706	0.478	0.429	0.437991
Tmem88	2.45e-05	0.107227	0.201	0.165	0.438454
Zfp9	2.45e-05	-0.04957	0.013	0.025	0.43934
Mapk1ip1l	2.46e-05	0.075162	0.145	0.112	0.441479
Cyfip1	2.5e-05	-0.11088	0.426	0.46	0.448692
Pycard	2.51e-05	0.060839	0.052	0.033	0.44955
H3f3a	2.51e-05	0.057003	0.981	0.983	0.450578
Gm16638	2.53e-05	-0.03529	0.008	0.018	0.452826
Gm5165	2.53e-05	-0.04161	0.014	0.027	0.452939
B3gat3	2.57e-05	-0.10416	0.122	0.152	0.460504
Trim65	2.59e-05	-0.08334	0.048	0.069	0.463685
Ccnl2	2.59e-05	-0.10241	0.27	0.306	0.463771
Hexim1	2.59e-05	0.088296	0.182	0.147	0.463873
Ctnnb1	2.59e-05	0.072751	0.879	0.859	0.464676
Nova2	2.59e-05	0.073232	0.282	0.237	0.464829
Zfp113	2.6e-05	-0.04429	0.014	0.027	0.4652
Nup35	2.63e-05	-0.06457	0.05	0.072	0.472059
Cp	2.68e-05	-0.13252	0.315	0.353	0.480721
Prex2	2.73e-05	-0.12056	0.49	0.521	0.488964
Rexo4	2.77e-05	-0.09742	0.105	0.133	0.496078
Desi2	2.77e-05	-0.11798	0.179	0.211	0.496368
Hey1	2.78e-05	-0.15014	0.131	0.16	0.497539
Mettl4	2.78e-05	-0.05678	0.032	0.049	0.49766
A430005L14Rik	2.8e-05	-0.09927	0.112	0.141	0.502326
Pgrmc2	2.82e-05	-0.10306	0.236	0.273	0.505321
Nudt2	2.86e-05	-0.07521	0.06	0.083	0.511814
Myo18a	2.87e-05	-0.1102	0.16	0.193	0.514032
Mfng	2.9e-05	0.114392	0.338	0.295	0.519222
Echs1	2.9e-05	-0.12372	0.217	0.251	0.520496
Selenow	2.93e-05	-0.07204	0.826	0.848	0.524282
Rnd2	2.95e-05	0.060627	0.062	0.041	0.527848
Pttg1	2.95e-05	-0.11487	0.386	0.419	0.528248
Pxdc1	2.99e-05	0.097014	0.176	0.141	0.535167
Fmo2	3e-05	0.110786	0.435	0.39	0.53689
Casp2	3.01e-05	-0.05666	0.036	0.054	0.538534
Rab8b	3.01e-05	-0.10189	0.114	0.143	0.539543
Gm31105	3.04e-05	-0.06011	0.029	0.046	0.545061
Adi1	3.07e-05	-0.07422	0.038	0.057	0.550751
Gm50232	3.1e-05	0.038747	0.025	0.012	0.555874
Ttpal	3.11e-05	0.057155	0.05	0.032	0.558191
Tmem87b	3.12e-05	0.070228	0.197	0.159	0.558766
Dhcr24	3.12e-05	-0.07673	0.05	0.071	0.559009
Ube2n	3.12e-05	-0.10569	0.333	0.372	0.559359
Eif3j2	3.14e-05	-0.04378	0.016	0.029	0.562231
Pitpnb	3.15e-05	0.096743	0.323	0.276	0.56387
Zfp410	3.16e-05	0.072883	0.083	0.059	0.565685
Entpd7	3.16e-05	-0.04306	0.016	0.029	0.566622
Rpl9	3.16e-05	0.051917	0.997	0.996	0.567077
Ccnt2	3.18e-05	-0.10482	0.103	0.131	0.569749
Trim5	3.18e-05	-0.06409	0.022	0.038	0.570643
Tmod3	3.2e-05	0.106052	0.672	0.636	0.572691
Uty	3.2e-05	-0.06521	0.032	0.049	0.573485
Cltb	3.22e-05	0.10098	0.577	0.531	0.576275
Cxcl1	3.22e-05	0.071847	0.042	0.025	0.577234
Ncl	3.23e-05	0.081747	0.698	0.648	0.579687
Ddhd1	3.25e-05	0.068543	0.095	0.069	0.581973
Zfp366	3.25e-05	-0.15286	0.316	0.353	0.58199
Morc3	3.28e-05	-0.09987	0.117	0.146	0.588443
Zfp651	3.3e-05	0.050962	0.032	0.018	0.592053
Zfp606	3.36e-05	-0.06376	0.026	0.042	0.601532
Gmpr2	3.38e-05	-0.10286	0.087	0.113	0.605365
Psme2	3.38e-05	-0.14343	0.377	0.407	0.606393
Rfc1	3.39e-05	-0.13271	0.269	0.304	0.607962
Thoc7	3.4e-05	-0.10213	0.325	0.366	0.60911
Ippk	3.45e-05	0.066036	0.081	0.058	0.618172
Gm17655	3.45e-05	-0.034	0.005	0.014	0.61908
Dynll2	3.46e-05	0.086139	0.2	0.164	0.619611
Snhg5	3.51e-05	0.051939	0.048	0.03	0.628119
Zfp319	3.53e-05	-0.06474	0.046	0.067	0.633076
Cdr2l	3.54e-05	0.050069	0.056	0.036	0.634172
Iqcc	3.55e-05	-0.05894	0.024	0.039	0.635622
Smdt1	3.57e-05	-0.09963	0.705	0.734	0.639743
Zfp91	3.59e-05	0.089501	0.529	0.472	0.642864
Nme2	3.59e-05	-0.07728	0.849	0.86	0.643221
Gm37494	3.6e-05	-0.08179	0.091	0.118	0.644729
Cisd2	3.62e-05	0.091818	0.355	0.308	0.648485
Ramac	3.68e-05	-0.11031	0.302	0.337	0.659332
Hspb8	3.69e-05	0.090558	0.187	0.152	0.661468
Tnfsf10	3.7e-05	-0.14198	0.291	0.325	0.662233
Eci1	3.72e-05	-0.10848	0.214	0.249	0.666322
Pla2g6	3.72e-05	0.066877	0.055	0.036	0.667005
Psmg2	3.73e-05	-0.08847	0.124	0.154	0.668487
Mcts1	3.81e-05	-0.12244	0.187	0.219	0.682342
Bola3	3.82e-05	-0.13221	0.261	0.296	0.685101
Erh	3.83e-05	-0.09367	0.149	0.181	0.686533
2023-09-01	3.84e-05	-0.06911	0.034	0.052	0.688435
Sdhaf2	3.84e-05	-0.09197	0.117	0.147	0.688699
Birc2	3.85e-05	0.10993	0.232	0.195	0.689236
Gm26724	3.85e-05	-0.04066	0.014	0.026	0.689333
Gm527	3.91e-05	-0.04782	0.013	0.025	0.700567
Gnai2	3.93e-05	0.060242	0.989	0.984	0.703584
Zfx	3.93e-05	-0.10746	0.168	0.2	0.704018
Kbtbd2	3.95e-05	0.10791	0.288	0.247	0.707159
Taco1	3.95e-05	-0.04199	0.013	0.025	0.707781
Otud6b	3.96e-05	-0.10007	0.127	0.157	0.709517
Mis12	4e-05	-0.10088	0.061	0.083	0.716498
Msh3	4.01e-05	-0.10039	0.075	0.099	0.717829
Zfp790	4.01e-05	-0.04855	0.019	0.034	0.717995
P4ha1	4.03e-05	-0.08042	0.116	0.146	0.722172
St6galnac3	4.05e-05	-0.13199	0.302	0.336	0.726483
Mpp2	4.08e-05	0.050095	0.031	0.017	0.730624
Sdhaf4	4.09e-05	-0.10553	0.17	0.202	0.732469
Eloc	4.17e-05	-0.09958	0.475	0.503	0.747469
Cdca4	4.18e-05	-0.04861	0.023	0.038	0.749265
Zfp3	4.18e-05	-0.03091	0.006	0.014	0.749889
Rps27l	4.25e-05	-0.12043	0.577	0.593	0.761546
Cnep1r1	4.33e-05	-0.10952	0.159	0.191	0.776391
Fam219b	4.34e-05	-0.10913	0.162	0.195	0.777691
Dph7	4.43e-05	-0.05341	0.021	0.035	0.793127
Zfp960	4.43e-05	-0.02232	0.006	0.014	0.794077
Bcl2	4.45e-05	0.083481	0.119	0.091	0.797603
Ndufs7	4.46e-05	-0.12128	0.437	0.467	0.798456
Purg	4.46e-05	-0.05916	0.026	0.042	0.800023
Fam124b	4.48e-05	-0.05819	0.023	0.038	0.802642
Pwwp2a	4.5e-05	-0.11946	0.12	0.148	0.805722
Tox3	4.5e-05	0.080405	0.088	0.064	0.807043
Urm1	4.51e-05	0.078589	0.175	0.141	0.808845
Cetn3	4.54e-05	-0.12521	0.592	0.607	0.812942
Cspp1	4.61e-05	-0.10265	0.157	0.189	0.826605
Alg11	4.62e-05	-0.06161	0.043	0.062	0.827469
Wasf2	4.64e-05	-0.08792	0.76	0.781	0.83099
Dmwd	4.64e-05	0.085896	0.174	0.141	0.831134
Asb8	4.65e-05	-0.08491	0.067	0.09	0.832867
Znhit1	4.67e-05	-0.1258	0.231	0.264	0.837095
Usp24	4.68e-05	-0.09578	0.089	0.115	0.839022
Hspa2	4.71e-05	0.046341	0.051	0.033	0.844625
Utp25	4.79e-05	-0.06077	0.031	0.048	0.858426
Usf3	4.83e-05	-0.12132	0.123	0.152	0.865055
Vmp1	4.84e-05	0.081612	0.233	0.195	0.86768
Mphosph8	4.89e-05	-0.12191	0.321	0.361	0.876174
Ddx58	4.89e-05	-0.11054	0.156	0.187	0.876916
Fdps	4.91e-05	-0.10383	0.204	0.237	0.879284
Rdh14	4.91e-05	-0.09619	0.095	0.121	0.879728
Malsu1	4.92e-05	-0.11973	0.17	0.2	0.882421
Zcchc10	4.96e-05	-0.09791	0.129	0.159	0.889051
Nrp1	5.01e-05	0.108549	0.69	0.649	0.897351
Map4k4	5.05e-05	0.088203	0.398	0.351	0.904731
Plxna2	5.05e-05	0.123498	0.456	0.419	0.905234
Pgam5	5.09e-05	-0.06803	0.042	0.062	0.911875
Ddx21	5.1e-05	-0.12801	0.282	0.315	0.914815
Fam136a	5.16e-05	-0.09459	0.075	0.099	0.924399
Ubfd1	5.19e-05	-0.07979	0.068	0.092	0.929711
Kbtbd3	5.22e-05	-0.08077	0.06	0.083	0.936051
Osbpl1a	5.26e-05	-0.12218	0.601	0.626	0.941929
Mlst8	5.27e-05	-0.04138	0.013	0.025	0.944463
Zfp971	5.3e-05	-0.04476	0.017	0.03	0.949467
Bcl2l12	5.3e-05	-0.07493	0.055	0.076	0.949968
Hist1h3e	5.36e-05	0.046923	0.04	0.024	0.961172
Dcaf5	5.4e-05	0.060027	0.119	0.091	0.968174
Sharpin	5.45e-05	-0.09219	0.087	0.113	0.976358
Mettl26	5.48e-05	-0.11002	0.113	0.141	0.981541
Nrde2	5.48e-05	-0.07098	0.044	0.064	0.982132
Fam126b	5.49e-05	-0.10942	0.124	0.153	0.983289
Plscr1	5.5e-05	-0.10433	0.1	0.127	0.985909
Zdhhc12	5.56e-05	-0.08004	0.055	0.076	0.997039
Ndufa7	5.58e-05	-0.07526	0.91	0.917	0.999299
Fry	5.65e-05	-0.08244	0.712	0.736	1
Thumpd2	5.66e-05	-0.06015	0.02	0.034	1
1700021F05Rik	5.7e-05	-0.0794	0.048	0.068	1
Coq5	5.72e-05	-0.07326	0.079	0.104	1
Mybbp1a	5.73e-05	-0.09474	0.135	0.165	1
Prrc1	5.75e-05	-0.11975	0.156	0.186	1
Mrps10	5.77e-05	-0.07341	0.083	0.108	1
Bptf	5.77e-05	-0.11599	0.488	0.52	1
Trmt112	5.77e-05	-0.12126	0.257	0.29	1
Krtcap2	5.79e-05	-0.10178	0.613	0.635	1
Trmt12	5.91e-05	-0.03833	0.011	0.021	1
Canx	5.93e-05	-0.1196	0.459	0.481	1
Ptrhd1	5.95e-05	0.065133	0.125	0.096	1
Zfp647	5.99e-05	-0.02513	0.008	0.017	1
Zfp799	6e-05	-0.03968	0.012	0.024	1
Sesn3	6e-05	0.086229	0.142	0.112	1
Sorbs2	6e-05	-0.09665	0.718	0.734	1
4930581F22Rik	6.05e-05	-0.11603	0.17	0.202	1
Cdan1	6.07e-05	-0.05169	0.033	0.05	1
Xrn1	6.15e-05	-0.10235	0.197	0.23	1
Smim11	6.18e-05	-0.11633	0.411	0.44	1
Mov10	6.2e-05	-0.04748	0.018	0.031	1
Gm49970	6.2e-05	-0.03754	0.012	0.023	1
Fasn	6.3e-05	-0.03232	0.011	0.021	1
Timm44	6.33e-05	-0.09861	0.13	0.158	1
Abtb1	6.48e-05	-0.06847	0.041	0.06	1
Alpl	6.51e-05	-0.18467	0.205	0.233	1
Rpl6	6.55e-05	-0.05939	0.985	0.987	1
Exoc6b	6.57e-05	-0.12613	0.224	0.256	1
Mbd3	6.58e-05	0.114465	0.367	0.327	1
Zfp212	6.61e-05	0.072952	0.101	0.076	1
Snhg15	6.65e-05	0.043053	0.027	0.014	1
Sema7a	6.65e-05	-0.12188	0.692	0.701	1
Casc3	6.67e-05	-0.09555	0.142	0.172	1
Gpank1	6.67e-05	-0.05879	0.048	0.068	1
Ppm1a	6.68e-05	0.093691	0.284	0.244	1
Gmppb	6.71e-05	-0.05963	0.027	0.043	1
Llgl1	6.73e-05	-0.0802	0.062	0.084	1
Fzd3	6.74e-05	-0.08803	0.053	0.074	1
Snap29	6.75e-05	-0.07629	0.067	0.09	1
Rhebl1	6.76e-05	0.055251	0.045	0.028	1
Ttc33	6.79e-05	-0.08336	0.106	0.133	1
Pradc1	6.8e-05	-0.08092	0.066	0.088	1
Snhg17	6.85e-05	-0.03943	0.015	0.027	1
Gpatch8	6.87e-05	-0.10952	0.312	0.347	1
Atg12	6.87e-05	-0.11079	0.278	0.314	1
Ppil1	6.95e-05	-0.06376	0.041	0.06	1
Sqle	6.96e-05	-0.04644	0.022	0.036	1
Rab13	6.97e-05	0.083363	0.165	0.134	1
Nsfl1c	6.98e-05	-0.1159	0.246	0.279	1
Fcho2	7e-05	-0.10954	0.615	0.643	1
Bfar	7.01e-05	-0.11898	0.159	0.189	1
Zfp78	7.03e-05	-0.02339	0.002	0.008	1
Fosl1	7.05e-05	0.01313	0.005	0	1
Il15	7.09e-05	0.053551	0.074	0.052	1
Prps1l3	7.09e-05	-0.06666	0.047	0.066	1
Prss23	7.11e-05	-0.12185	0.34	0.374	1
Pcbp1	7.14e-05	0.096008	0.556	0.506	1
Mmp11	7.16e-05	-0.02308	0.002	0.008	1
Tmem94	7.21e-05	-0.06278	0.048	0.067	1
mt-Nd4	7.25e-05	-0.06364	0.986	0.984	1
4930403P22Rik	7.29e-05	0.020112	0.009	0.002	1
Nudt5	7.33e-05	-0.08927	0.085	0.11	1
Mfhas1	7.36e-05	0.106386	0.463	0.418	1
Tm4sf1	7.37e-05	0.112455	0.801	0.773	1
Klhl28	7.41e-05	-0.07198	0.074	0.098	1
Ggta1	7.44e-05	-0.06566	0.045	0.064	1
4930430F08Rik	7.45e-05	-0.08298	0.048	0.067	1
Usp36	7.5e-05	0.064831	0.112	0.086	1
Mettl2	7.53e-05	-0.04495	0.019	0.033	1
Eef1g	7.53e-05	0.092841	0.588	0.539	1
Acadl	7.55e-05	-0.11135	0.453	0.485	1
Invs	7.58e-05	-0.05647	0.025	0.04	1
Gpr160	7.61e-05	-0.09144	0.059	0.08	1
Kcnab1	7.64e-05	0.026683	0.012	0.004	1
A630052C17Rik	7.64e-05	-0.0308	0.007	0.015	1
Epha4	7.67e-05	0.115597	0.345	0.305	1
Rpl7l1	7.7e-05	-0.10439	0.213	0.246	1
Bst2	7.75e-05	-0.14582	0.526	0.551	1
Fsd1l	7.76e-05	-0.05265	0.023	0.038	1
2810454H06Rik	7.77e-05	-0.08563	0.06	0.081	1
Arhgef2	7.78e-05	-0.12377	0.349	0.38	1
Sdcbp2	7.82e-05	0.02049	0.007	0.001	1
Pdcd10	7.89e-05	-0.08908	0.541	0.572	1
Golga2	7.96e-05	-0.09543	0.122	0.15	1
Golgb1	8.05e-05	-0.13299	0.34	0.374	1
Maz	8.07e-05	-0.11257	0.159	0.187	1
Sri	8.1e-05	-0.09582	0.674	0.695	1
Itga3	8.1e-05	0.055593	0.057	0.038	1
Card6	8.19e-05	-0.04376	0.017	0.029	1
Mrps33	8.31e-05	-0.11015	0.47	0.501	1
Myl12b	8.32e-05	0.061414	0.966	0.957	1
Dnajc25	8.37e-05	-0.07976	0.054	0.075	1
Ndufc2	8.39e-05	-0.07826	0.63	0.661	1
Rilpl2	8.4e-05	-0.06924	0.05	0.07	1
Rwdd1	8.5e-05	-0.10949	0.435	0.472	1
Supt20	8.52e-05	-0.10233	0.18	0.21	1
Ppp1r13l	8.53e-05	0.026662	0.016	0.006	1
Sppl3	8.55e-05	0.075925	0.126	0.098	1
Tnrc6c	8.55e-05	-0.09825	0.432	0.468	1
Man2a1	8.58e-05	-0.10787	0.177	0.209	1
Ak3	8.59e-05	-0.11553	0.278	0.311	1
Vamp5	8.64e-05	-0.11861	0.368	0.402	1
Meox1	8.65e-05	0.10244	0.122	0.096	1
Csf1	8.71e-05	-0.07956	0.05	0.07	1
C430049B03Rik	8.75e-05	-0.0386	0.011	0.022	1
Mxd4	8.77e-05	-0.1174	0.48	0.51	1
Glud1	8.81e-05	-0.12868	0.358	0.39	1
Elp2	8.83e-05	-0.06757	0.055	0.076	1
Rpusd4	8.84e-05	-0.06295	0.04	0.058	1
Il18	8.88e-05	0.053279	0.04	0.025	1
Dnajc21	8.97e-05	0.098221	0.285	0.246	1
Bcat2	9.08e-05	-0.05976	0.04	0.058	1
Usp34	9.15e-05	-0.11528	0.432	0.464	1
Selenom	9.17e-05	-0.10832	0.542	0.566	1
Dpm2	9.3e-05	-0.10654	0.144	0.173	1
Atg4a	9.32e-05	-0.0784	0.057	0.078	1
Msl3l2	9.38e-05	-0.04068	0.015	0.027	1
Slc20a1	9.41e-05	0.04828	0.041	0.025	1
Elf2	9.42e-05	0.093807	0.486	0.441	1
Riox1	9.56e-05	-0.04607	0.02	0.033	1
Atr	9.7e-05	-0.05706	0.042	0.061	1
Rpia	9.72e-05	-0.08564	0.076	0.1	1
Zfp275	9.78e-05	-0.05034	0.035	0.052	1
Ucp2	9.85e-05	0.118455	0.575	0.533	1
Fbxo9	9.87e-05	-0.11728	0.2	0.232	1
Cbr3	9.93e-05	-0.05404	0.026	0.041	1
Washc4	9.94e-05	-0.09565	0.111	0.137	1
Phf23	0.000102	-0.07833	0.096	0.122	1
Mical1	0.000102	-0.07671	0.044	0.062	1
Zc2hc1a	0.000103	-0.08896	0.089	0.114	1
Hopx	0.000103	0.030031	0.011	0.004	1
Srm	0.000103	-0.07398	0.044	0.062	1
Rhoq	0.000104	-0.09936	0.141	0.171	1
Zfp706	0.000105	-0.12352	0.365	0.393	1
Rsad2	0.000105	-0.1353	0.26	0.292	1
Orc3	0.000105	-0.06799	0.055	0.076	1
Pgrmc1	0.000106	0.073075	0.471	0.422	1
Psmc2	0.000106	-0.1038	0.301	0.333	1
Gm49980	0.000107	-0.04561	0.017	0.029	1
D330041H03Rik	0.000107	-0.042	0.013	0.024	1
Csnk2a2	0.000108	0.096472	0.317	0.277	1
Trim62	0.000108	0.044076	0.041	0.026	1
Rab42	0.000111	-0.01798	0.003	0.009	1
Bbip1	0.000112	-0.1369	0.356	0.387	1
Smim8	0.000112	-0.09637	0.071	0.094	1
Wdr1	0.000113	0.083961	0.265	0.226	1
Tmco6	0.000114	-0.05003	0.024	0.039	1
Mdp1	0.000118	-0.10057	0.189	0.22	1
Exoc5	0.000118	0.108242	0.347	0.31	1
Als2cl	0.000118	-0.08906	0.081	0.104	1
Ssr2	0.000118	0.076663	0.387	0.341	1
Hist1h3a	0.000119	0.0343	0.019	0.009	1
Gm9946	0.000119	-0.11721	0.187	0.219	1
Krit1	0.00012	-0.12499	0.205	0.236	1
Mocs3	0.000124	-0.04494	0.018	0.031	1
Gm14325	0.000125	-0.03742	0.012	0.022	1
CAAA01147332.1	0.000125	-0.06036	0.035	0.051	1
Snrnp70	0.000125	-0.11552	0.428	0.456	1
Smagp	0.000127	0.109992	0.405	0.366	1
Rbbp7	0.000127	0.087316	0.367	0.32	1
Hivep2	0.000127	0.093235	0.178	0.146	1
Bloc1s6	0.000128	-0.10054	0.101	0.126	1
Supt5	0.000128	-0.10068	0.225	0.256	1
Ints10	0.000129	-0.07435	0.049	0.068	1
Crispld1	0.000129	-0.08599	0.084	0.108	1
Ube2q2	0.000129	-0.08658	0.098	0.123	1
Prpf18	0.00013	-0.09951	0.124	0.152	1
Selenoi	0.00013	-0.0649	0.031	0.047	1
Cnpy2	0.000131	-0.0979	0.265	0.299	1
Pias3	0.000131	-0.08244	0.067	0.088	1
Crem	0.000134	0.081622	0.268	0.23	1
Atp5g1	0.000134	-0.10465	0.459	0.489	1
Cnot6	0.000134	-0.10965	0.321	0.356	1
Lyrm2	0.000136	-0.0883	0.122	0.149	1
Rex1bd	0.000136	-0.10839	0.277	0.312	1
Slbp	0.000138	0.077784	0.125	0.098	1
Kif13b	0.000138	-0.10027	0.169	0.198	1
Zfp51	0.00014	-0.05078	0.023	0.037	1
Asb13	0.000141	-0.10512	0.088	0.111	1
Mpc1	0.000141	0.082029	0.491	0.442	1
Magohb	0.000142	-0.08335	0.073	0.095	1
Lnpk	0.000143	-0.06718	0.046	0.065	1
[truncated: 15,922 more rows]
