# Supplementary material for: Safe focused ultrasound-mediated blood-brain barrier opening is driven primarily by transient reorganization of tight junctions
Source: bioRxiv preprint, doi:10.1101/2025.01.28.635258, version 1 (2025-01-31)
Supplement: Table 3 [file 635258_file11.xlsx]

## Sheet: Sheet1
Dataset S2 - Differentially expressed genes for capillaries 72 hours after exposure to 450 kPa FUS.
	p_val	avg_log2FC	pct.1	pct.2	p_val_adj
Slc2a1	0	0.822194	0.999	0.989	0
Gm42418	0	1.57792	1	1	0
Lars2	6.37e-298	1.20015	0.982	0.891	1.14e-293
Zbtb16	2.65e-283	1.14706	0.45	0.048	4.74e-279
Plat	8.69e-235	1.15029	0.931	0.696	1.56e-230
Ndrg1	2.69e-226	0.96837	0.972	0.848	4.82e-222
Tmcc3	2.1e-217	1.27787	0.739	0.354	3.76e-213
Bsg	5.14e-215	-0.50196	1	1	9.22e-211
Tpt1	9.33e-207	0.521529	0.999	0.998	1.67e-202
AY036118	1.97e-197	0.882241	0.97	0.83	3.53e-193
Nostrin	1.6e-195	0.798279	0.972	0.863	2.87e-191
mt-Atp6	2.2e-191	0.559838	1	0.999	3.94e-187
Clip1	3.47e-179	1.02084	0.831	0.54	6.21e-175
Trp53inp1	5.08e-176	1.0826	0.521	0.168	9.1e-172
Cdkn1a	3.59e-175	0.760544	0.981	0.907	6.43e-171
mt-Co3	5.58e-172	0.559335	1	0.995	1e-167
Slc6a6	2.9e-170	-0.92998	0.771	0.938	5.2e-166
Selenop	1.74e-167	0.778715	0.997	0.972	3.12e-163
mt-Nd2	7.85e-165	0.592961	0.995	0.987	1.41e-160
Mcf2l	3.77e-164	0.931514	0.785	0.476	6.75e-160
Apold1	3.45e-159	0.992239	0.87	0.604	6.18e-155
Snrk	2.36e-158	0.828603	0.905	0.696	4.23e-154
Cxcl12	2.48e-157	-0.86168	0.981	0.992	4.45e-153
Timp3	7.43e-156	0.871266	0.94	0.8	1.33e-151
mt-Co2	1.15e-154	0.470795	0.999	0.999	2.06e-150
Cdc42ep3	1.16e-151	0.990282	0.829	0.573	2.08e-147
Cttnbp2nl	2.26e-150	0.91233	0.751	0.431	4.05e-146
Xdh	2.52e-147	1.00604	0.798	0.561	4.52e-143
Map3k6	7.76e-145	0.835001	0.379	0.094	1.39e-140
Tsc22d3	3.81e-143	0.771983	0.949	0.787	6.82e-139
Lrrn3	1.45e-142	-1.18084	0.12	0.473	2.59e-138
Net1	1.48e-142	0.971624	0.778	0.489	2.65e-138
Galnt15	5.33e-140	0.94111	0.45	0.149	9.55e-136
Plxna2	1.38e-129	0.954056	0.691	0.419	2.47e-125
Pim3	1.41e-129	0.816046	0.883	0.679	2.52e-125
Ccdc141	1.85e-129	0.711746	0.954	0.856	3.32e-125
Grb14	3.32e-129	-0.98989	0.243	0.573	5.95e-125
Ctla2a	4.43e-121	0.76415	0.985	0.939	7.94e-117
mt-Co1	1.74e-120	0.447069	1	0.997	3.11e-116
Ucp2	5.18e-119	0.920997	0.76	0.533	9.28e-115
Ctla2b	3.3e-117	0.902363	0.672	0.388	5.92e-113
Fam107a	2.61e-115	0.805231	0.437	0.158	4.68e-111
Maff	1.63e-113	0.822878	0.488	0.202	2.92e-109
Rps14	2.36e-112	0.423778	0.998	0.983	4.23e-108
mt-Nd1	1.35e-106	0.492905	0.99	0.948	2.41e-102
Klf9	7.08e-102	0.654426	0.896	0.733	1.27e-97
Serinc3	2.62e-100	0.576239	0.956	0.894	4.69e-96
Dynll1	7.58e-100	-0.57178	0.858	0.946	1.36e-95
Ppia	4.86e-99	-0.42044	0.991	0.995	8.72e-95
Hes1	1.47e-98	0.918134	0.899	0.742	2.64e-94
Sash1	4.88e-98	0.702895	0.809	0.615	8.75e-94
Rpl13a	2.19e-95	0.456097	0.981	0.929	3.92e-91
Snx3	7.99e-94	-0.59911	0.702	0.866	1.43e-89
Pcp4l1	8.7e-94	-0.60345	0.826	0.92	1.56e-89
Clic4	1.15e-93	0.608606	0.91	0.8	2.06e-89
Akap12	2.84e-93	0.831164	0.876	0.737	5.08e-89
Rps6	1.28e-92	0.515737	0.952	0.854	2.3e-88
Tmc7	1.96e-90	0.7289	0.508	0.249	3.51e-86
Sec14l1	5.97e-88	0.722502	0.666	0.427	1.07e-83
Zfp36	5.33e-87	0.603821	0.915	0.73	9.55e-83
Fnbp1l	1.23e-86	0.672243	0.816	0.643	2.2e-82
Doc2b	2.89e-85	0.429175	0.136	0.01	5.18e-81
Ndnf	4.22e-82	-1.0444	0.171	0.421	7.57e-78
Tgfb2	4.45e-82	-0.9387	0.175	0.431	7.97e-78
Fkbp5	8.07e-81	0.440809	0.143	0.014	1.45e-76
Cobll1	2.69e-79	-0.74789	0.275	0.529	4.83e-75
Synm	1.2e-78	0.674866	0.772	0.571	2.15e-74
Gimap6	2.02e-78	0.609068	0.825	0.659	3.62e-74
Rnf103	3.88e-78	0.694362	0.448	0.219	6.95e-74
Tmem252	5.73e-78	0.88392	0.649	0.42	1.03e-73
Cldn5	3.1e-77	-0.27271	1	1	5.55e-73
Rpl17	1.98e-75	0.380732	0.991	0.954	3.55e-71
Pik3ip1	2.3e-75	0.618065	0.668	0.437	4.12e-71
Kdr	6.7e-75	-0.58957	0.783	0.888	1.2e-70
Rps15	8.2e-75	0.45172	0.963	0.858	1.47e-70
Ets1	1.23e-73	-0.6398	0.55	0.734	2.2e-69
Cavin2	3.64e-73	0.589003	0.92	0.832	6.53e-69
mt-Cytb	1.9e-72	0.322563	0.999	0.998	3.4e-68
S1pr1	1.93e-71	0.408115	0.988	0.958	3.46e-67
Angptl4	5.37e-71	0.753158	0.261	0.084	9.62e-67
Rps12	9.11e-71	0.352768	0.992	0.978	1.63e-66
Slc9a3r2	4.94e-69	-0.50298	0.875	0.935	8.86e-65
Tnfrsf12a	1.82e-67	0.650015	0.395	0.186	3.26e-63
Btg2	3.28e-67	0.533734	0.958	0.884	5.88e-63
Dusp1	7.66e-67	0.480592	0.979	0.908	1.37e-62
Usp54	1.88e-66	0.623672	0.401	0.191	3.36e-62
Acer2	1.41e-65	0.640746	0.577	0.353	2.53e-61
Gng11	1.99e-63	-0.46093	0.871	0.942	3.57e-59
Paqr5	2.24e-63	0.52103	0.809	0.651	4.01e-59
Rps23	3.09e-63	0.308152	0.995	0.99	5.53e-59
Sgms1	1.29e-62	0.387532	0.983	0.935	2.32e-58
St8sia4	2.6e-62	-0.62322	0.402	0.615	4.66e-58
Nfkbia	4.5e-62	0.355166	0.992	0.982	8.06e-58
Fosb	1.28e-61	0.574002	0.782	0.573	2.3e-57
Pakap.1	1.45e-61	0.479291	0.924	0.856	2.6e-57
Id1	3.04e-61	0.51655	0.972	0.936	5.44e-57
Tfrc	4.48e-61	-0.72354	0.472	0.677	8.02e-57
Ranbp9	4.17e-60	0.58633	0.37	0.176	7.48e-56
Dock9	1.75e-59	0.508177	0.782	0.628	3.14e-55
Hmcn1	2.17e-58	-0.51725	0.866	0.923	3.9e-54
Txnip	2.61e-57	0.597401	0.775	0.632	4.68e-53
Rpl26	8.34e-57	0.294116	0.994	0.989	1.49e-52
Gm26532	9.34e-57	0.709962	0.562	0.348	1.67e-52
Il10rb	2.47e-56	-0.55759	0.458	0.646	4.42e-52
Atf3	3.37e-56	0.694797	0.621	0.415	6.04e-52
Mat2a	1.01e-55	0.594119	0.636	0.441	1.81e-51
Cbx3	4.1e-55	-0.54162	0.593	0.751	7.36e-51
Ndufa4	9.5e-55	-0.42521	0.806	0.888	1.7e-50
Chka	1.08e-54	0.559857	0.43	0.234	1.94e-50
Spsb1	5.66e-54	0.454114	0.196	0.059	1.01e-49
Fzd4	1.65e-53	0.524384	0.668	0.481	2.95e-49
Rpl12	8.44e-53	0.402663	0.895	0.772	1.51e-48
Smad1	1.52e-52	0.560172	0.45	0.256	2.72e-48
Ifitm3	6.74e-52	-0.5352	0.86	0.911	1.21e-47
Cav2	7.72e-52	-0.52756	0.549	0.713	1.38e-47
Ccny	1.01e-51	0.520818	0.676	0.507	1.82e-47
4430402I18Rik	2.12e-51	0.585126	0.449	0.256	3.8e-47
Lmo2	8.55e-51	-0.53193	0.646	0.777	1.53e-46
Fut8	8.72e-51	-0.59478	0.313	0.507	1.56e-46
Tpm4	5.74e-50	0.406153	0.891	0.788	1.03e-45
Epas1	8.49e-50	0.317823	0.987	0.959	1.52e-45
1810037I17Rik	2.75e-49	-0.44084	0.747	0.849	4.93e-45
Mal	3.55e-49	0.567614	0.906	0.838	6.37e-45
Sesn1	4.11e-49	0.560683	0.51	0.322	7.37e-45
Ccn1	4.92e-49	0.726965	0.56	0.37	8.82e-45
Cd59a	6.17e-49	0.562239	0.755	0.623	1.11e-44
Kbtbd11	7.85e-49	0.569865	0.412	0.232	1.41e-44
Malat1	2.38e-48	-0.3289	1	1	4.27e-44
Fam117b	3.64e-48	0.549808	0.528	0.338	6.52e-44
Eef1a1	6.2e-48	0.267212	0.999	0.994	1.11e-43
Gsta4	1.17e-47	-0.55945	0.564	0.71	2.09e-43
Fry	1.55e-46	0.442779	0.853	0.736	2.77e-42
Sorbs1	1.94e-46	0.525449	0.589	0.418	3.47e-42
Arl4d	3.44e-46	0.54138	0.478	0.293	6.17e-42
Mxd4	6.76e-46	0.504972	0.678	0.51	1.21e-41
Syn3	1.27e-45	0.447181	0.244	0.1	2.28e-41
Rps25	2.28e-45	0.296702	0.98	0.947	4.09e-41
Slc40a1	3.06e-45	-0.52992	0.474	0.636	5.48e-41
Egfl7	7.52e-45	-0.32969	0.977	0.985	1.35e-40
Rdx	1.35e-44	-0.45024	0.721	0.831	2.42e-40
Rpl5	5.81e-44	0.376199	0.891	0.777	1.04e-39
Synpo2	8.04e-44	-0.42421	0.033	0.165	1.44e-39
Fas	8.52e-44	0.442334	0.694	0.52	1.53e-39
Sumo2	1.48e-43	-0.37948	0.747	0.842	2.64e-39
Tnfrsf19	1.99e-43	-0.50185	0.272	0.461	3.57e-39
Rgcc	3.51e-43	0.519051	0.892	0.821	6.28e-39
Mt1	4.35e-43	-0.52125	0.769	0.85	7.79e-39
Sult1a1	5.89e-43	0.528608	0.404	0.235	1.06e-38
Pmaip1	1.01e-42	0.689926	0.34	0.183	1.82e-38
Csrnp1	2.42e-42	0.446751	0.285	0.133	4.34e-38
Kitl	4.72e-42	-0.41059	0.818	0.899	8.47e-38
Atox1	4.78e-42	-0.33851	0.921	0.958	8.57e-38
Hipk1	1.2e-41	0.488597	0.508	0.337	2.15e-37
Apoe	1.42e-41	0.368797	0.958	0.904	2.55e-37
Ccdc85a	1.9e-41	0.482542	0.428	0.254	3.4e-37
Bcl2l1	5.58e-41	0.47195	0.619	0.453	1e-36
Ralbp1	1.61e-40	0.480577	0.796	0.69	2.89e-36
Shroom2	2.77e-40	0.400652	0.211	0.084	4.96e-36
Irak2	4.76e-40	0.420408	0.293	0.143	8.53e-36
Cyth3	5.04e-40	0.480313	0.668	0.517	9.03e-36
Kcna5	9.64e-40	0.280277	0.108	0.023	1.73e-35
Pnpla2	9.8e-40	0.505495	0.534	0.365	1.76e-35
Sat1	1.5e-39	0.682302	0.646	0.5	2.69e-35
mt-Nd3	1.92e-39	0.369746	0.861	0.748	3.44e-35
Clec2d	3.24e-39	-0.42836	0.747	0.844	5.81e-35
Slc25a33	6.35e-39	0.470702	0.3	0.152	1.14e-34
Vwa1	7.99e-39	-0.34374	0.921	0.951	1.43e-34
Slc38a2	9.04e-39	0.392386	0.922	0.84	1.62e-34
Junb	2.51e-38	0.281784	0.979	0.863	4.5e-34
Srarp	2.57e-38	-0.4902	0.439	0.601	4.6e-34
Sec61b	3.56e-38	-0.41632	0.438	0.597	6.38e-34
Ptn	3.87e-38	-0.44996	0.882	0.915	6.93e-34
Ubb	4.05e-38	-0.21612	0.998	0.999	7.26e-34
Rack1	8.38e-38	0.338927	0.887	0.804	1.5e-33
Klf13	1.54e-37	0.383212	0.847	0.733	2.76e-33
Plekhh2	3.82e-37	-0.51298	0.168	0.33	6.84e-33
Dapk1	4.4e-37	0.401739	0.261	0.123	7.88e-33
Tsc22d1	1.33e-36	0.262202	0.997	0.991	2.39e-32
Rplp1	1.45e-36	0.215007	1	0.993	2.59e-32
Edf1	2.86e-36	-0.3827	0.64	0.755	5.12e-32
Rnf144b	4.32e-36	0.467739	0.556	0.402	7.74e-32
Nr4a1	1.24e-35	0.500349	0.59	0.418	2.23e-31
Tiam1	1.65e-35	-0.44518	0.423	0.589	2.96e-31
Egr1	6.56e-35	0.643215	0.489	0.324	1.18e-30
Adgrl4	7.45e-35	0.274306	0.993	0.978	1.34e-30
Klf7	8.64e-35	0.408969	0.774	0.658	1.55e-30
Rpl23a	2.09e-34	0.326421	0.886	0.791	3.75e-30
Cav1	2.2e-34	-0.48872	0.398	0.554	3.93e-30
Agfg1	2.23e-34	-0.43958	0.379	0.543	4e-30
Tpm1	3.19e-34	-0.41973	0.525	0.66	5.72e-30
Sertad1	4.65e-34	0.47488	0.462	0.308	8.33e-30
Rasip1	1.15e-33	0.370696	0.783	0.656	2.06e-29
Mgat4a	1.37e-33	0.322096	0.143	0.048	2.45e-29
Pfdn1	1.95e-33	-0.42006	0.388	0.553	3.49e-29
Elob	2e-33	-0.31175	0.783	0.87	3.59e-29
Cd34	2.22e-33	-0.34168	0.809	0.876	3.97e-29
Uqcrb	2.89e-33	-0.31897	0.802	0.871	5.18e-29
Ifnar1	4.25e-33	-0.46085	0.377	0.531	7.62e-29
Isg15	6.63e-33	-0.67775	0.223	0.379	1.19e-28
Rps18	8.75e-33	0.232829	0.989	0.976	1.57e-28
Cst3	1.08e-32	-0.29754	0.964	0.98	1.94e-28
Gnas	1.52e-32	-0.21555	0.993	0.997	2.73e-28
Itm2b	1.92e-32	-0.20116	0.996	0.999	3.44e-28
Atp5j	2.92e-32	-0.29122	0.885	0.924	5.23e-28
Atp5j2	3.26e-32	-0.31725	0.751	0.829	5.84e-28
Lpar6	4.97e-32	-0.50075	0.225	0.383	8.91e-28
Selenof	7.03e-32	-0.31978	0.748	0.833	1.26e-27
Pfn1	8.04e-32	-0.37609	0.625	0.728	1.44e-27
Igf1r	8.55e-32	0.259623	0.991	0.972	1.53e-27
Kif23	1.15e-31	0.320355	0.159	0.061	2.07e-27
Eno1	1.23e-31	-0.44302	0.26	0.418	2.2e-27
Plaur	2.02e-31	0.386948	0.194	0.085	3.62e-27
Dipk1a	2.27e-31	-0.41178	0.135	0.279	4.07e-27
Tbc1d4	2.91e-31	0.470401	0.542	0.397	5.22e-27
Nme2	4.76e-31	-0.32271	0.787	0.86	8.53e-27
Hprt	4.86e-31	-0.38911	0.507	0.637	8.7e-27
Crip1	5.08e-31	-0.48458	0.524	0.648	9.1e-27
Rnaset2b	5.54e-31	-0.39443	0.419	0.562	9.93e-27
Myct1	5.82e-31	-0.4242	0.096	0.224	1.04e-26
Ttll7	7.41e-31	0.37979	0.759	0.65	1.33e-26
Itm2a	7.48e-31	-0.24668	0.999	0.998	1.34e-26
Pmp22	9.56e-31	0.431511	0.379	0.232	1.71e-26
Stard13	1.28e-30	0.385952	0.312	0.178	2.29e-26
Calcrl	1.35e-30	-0.44213	0.214	0.363	2.43e-26
Uba52	1.87e-30	-0.34734	0.603	0.726	3.35e-26
Ifitm2	2.31e-30	-0.39717	0.621	0.727	4.14e-26
Hspa8	2.6e-30	0.259543	0.982	0.964	4.66e-26
Parvb	2.66e-30	0.385086	0.727	0.61	4.76e-26
Rgs12	4.51e-30	0.406092	0.737	0.631	8.08e-26
Arl6ip5	5.95e-30	-0.37565	0.531	0.663	1.07e-25
H2afz	1.12e-29	-0.37429	0.619	0.732	2.01e-25
Fos	1.33e-29	0.265067	0.93	0.8	2.38e-25
Ifnar2	1.42e-29	-0.37795	0.64	0.746	2.54e-25
Ly6a	1.77e-29	-0.2692	0.994	0.995	3.17e-25
Mt2	1.99e-29	-0.43276	0.343	0.494	3.57e-25
Uqcc2	2.51e-29	-0.39576	0.46	0.596	4.5e-25
Phactr1	3.49e-29	0.417801	0.393	0.252	6.26e-25
Nrp1	3.63e-29	-0.40803	0.521	0.649	6.5e-25
Shld1	4.6e-29	0.407075	0.423	0.279	8.25e-25
Klf3	5.09e-29	0.428429	0.593	0.453	9.12e-25
Tob1	7.53e-29	0.412772	0.593	0.463	1.35e-24
Abhd2	7.65e-29	-0.3586	0.681	0.774	1.37e-24
Anp32a	1.04e-28	-0.35388	0.664	0.746	1.86e-24
Ost4	1.52e-28	-0.35447	0.571	0.693	2.72e-24
Rpl7	1.52e-28	0.232663	0.989	0.964	2.73e-24
Ndufa8	2.2e-28	-0.39454	0.304	0.448	3.95e-24
Adgrg1	2.38e-28	0.358298	0.592	0.451	4.27e-24
H2-D1	3.74e-28	-0.30191	0.932	0.948	6.7e-24
Cnot6l	3.75e-28	0.39011	0.661	0.539	6.71e-24
Sgpp2	3.92e-28	-0.40698	0.204	0.344	7.02e-24
Tceal9	4.52e-28	0.603611	0.625	0.525	8.1e-24
Lpin1	5.15e-28	0.373225	0.154	0.063	9.22e-24
Zfp771	5.7e-28	-0.38486	0.167	0.305	1.02e-23
Gm17056	6.11e-28	0.259507	0.119	0.039	1.09e-23
Selenow	7.18e-28	-0.28258	0.78	0.848	1.29e-23
Ccnl1	8.36e-28	0.383394	0.532	0.395	1.5e-23
Cyb5a	8.64e-28	-0.36831	0.431	0.572	1.55e-23
Msrb2	1.14e-27	-0.37326	0.119	0.248	2.05e-23
Ppp1r15a	1.27e-27	0.372718	0.526	0.375	2.27e-23
Pdxk	1.53e-27	0.404253	0.516	0.377	2.74e-23
Acsl3	1.85e-27	-0.45732	0.186	0.322	3.32e-23
Gimap5	2.32e-27	0.360999	0.32	0.19	4.15e-23
Sh2d3c	2.51e-27	0.381088	0.402	0.265	4.5e-23
Actb	3.9e-27	0.198672	1	0.999	6.99e-23
Fam13c	4.3e-27	-0.41553	0.384	0.521	7.71e-23
Nek7	4.4e-27	0.418663	0.482	0.348	7.89e-23
Dgkh	4.48e-27	0.37785	0.354	0.221	8.03e-23
Selenom	4.81e-27	-0.39647	0.434	0.566	8.61e-23
Nmt1	5.75e-27	-0.34017	0.528	0.666	1.03e-22
H1f0	6.2e-27	-0.45905	0.194	0.328	1.11e-22
Serf2	7.95e-27	-0.2711	0.887	0.925	1.43e-22
Slc16a4	9.16e-27	-0.40289	0.372	0.506	1.64e-22
Proser2	1.03e-26	0.381937	0.571	0.433	1.85e-22
Mrpl33	1.49e-26	-0.37249	0.357	0.501	2.66e-22
Ccn2	1.77e-26	0.477737	0.428	0.285	3.16e-22
Neat1	1.83e-26	0.424373	0.537	0.401	3.28e-22
Zfp608	2.05e-26	-0.33261	0.049	0.148	3.67e-22
Crem	2.54e-26	0.354125	0.363	0.23	4.54e-22
Tnfsf10	2.79e-26	-0.39643	0.189	0.325	5e-22
Ndufv3	2.79e-26	-0.37864	0.349	0.492	5.01e-22
Adam10	3.02e-26	-0.39141	0.444	0.574	5.41e-22
Klhl6	3.07e-26	-0.31741	0.068	0.175	5.5e-22
Dbi	3.21e-26	-0.35311	0.504	0.625	5.75e-22
Notch1	3.46e-26	0.358888	0.648	0.52	6.21e-22
Pde2a	4.08e-26	0.347294	0.794	0.703	7.31e-22
Mark3	1.32e-25	0.365653	0.471	0.333	2.36e-21
Lpin2	1.37e-25	0.366511	0.214	0.111	2.46e-21
Zhx3	1.68e-25	0.394446	0.382	0.252	3.02e-21
Lrrc8a	1.95e-25	0.426861	0.457	0.329	3.5e-21
Atp5e	1.98e-25	-0.28216	0.833	0.881	3.55e-21
Sgk1	2.05e-25	0.424121	0.685	0.573	3.67e-21
Polr2e	2.12e-25	-0.40017	0.306	0.439	3.8e-21
Cenpx	2.17e-25	-0.37343	0.28	0.419	3.9e-21
Tspo	2.56e-25	-0.33734	0.562	0.684	4.59e-21
Gna11	2.93e-25	-0.37013	0.444	0.572	5.24e-21
Cyth1	2.98e-25	0.364098	0.316	0.194	5.34e-21
Lef1	3.11e-25	-0.34773	0.754	0.829	5.57e-21
Gng5	6.73e-25	-0.22439	0.963	0.975	1.21e-20
Srsf5	1.09e-24	0.355696	0.763	0.668	1.95e-20
Kctd12	1.12e-24	0.426121	0.547	0.431	2.02e-20
Sem1	1.14e-24	-0.27967	0.821	0.879	2.04e-20
Cox8a	1.25e-24	-0.25722	0.867	0.907	2.23e-20
Rasgrp2	1.68e-24	0.361894	0.562	0.425	3.01e-20
Layn	1.74e-24	-0.37183	0.24	0.377	3.12e-20
Rps9	1.94e-24	0.201627	0.984	0.974	3.48e-20
Rbx1	1.95e-24	-0.29081	0.693	0.768	3.5e-20
Psmb8	3.04e-24	-0.38938	0.324	0.457	5.46e-20
Slc39a10	3.3e-24	-0.25995	0.884	0.923	5.91e-20
Cd81	3.38e-24	-0.31411	0.789	0.853	6.06e-20
Park7	3.8e-24	-0.31288	0.582	0.699	6.81e-20
Bsdc1	4.15e-24	0.333719	0.295	0.177	7.43e-20
Ndufb7	4.71e-24	-0.32928	0.492	0.625	8.43e-20
Psme1	4.87e-24	-0.34236	0.554	0.67	8.72e-20
Tpr	6.91e-24	-0.36888	0.527	0.648	1.24e-19
Anxa2	9.68e-24	-0.3766	0.374	0.504	1.73e-19
Rnaset2a	9.88e-24	-0.36614	0.38	0.51	1.77e-19
mt-Nd5	1.86e-23	0.303202	0.787	0.682	3.34e-19
Sec61g	2.56e-23	-0.30268	0.656	0.753	4.59e-19
Thra	2.9e-23	-0.3806	0.395	0.522	5.2e-19
Chchd2	4.98e-23	-0.19973	0.967	0.978	8.93e-19
Fn1	5.18e-23	0.283393	0.923	0.863	9.29e-19
Abcc4	5.19e-23	0.35926	0.613	0.494	9.3e-19
Cox5b	5.33e-23	-0.28115	0.634	0.739	9.55e-19
Cnbp	6.58e-23	-0.27251	0.713	0.808	1.18e-18
Tns1	6.59e-23	0.293312	0.777	0.679	1.18e-18
2810029C07Rik	6.99e-23	0.198498	0.074	0.019	1.25e-18
Pttg1ip	8.77e-23	0.300428	0.732	0.622	1.57e-18
Prr5l	9.4e-23	-0.30458	0.105	0.215	1.68e-18
Gpx4	1.03e-22	-0.25213	0.812	0.868	1.85e-18
Tinagl1	1.07e-22	0.339392	0.75	0.649	1.91e-18
Mcl1	1.12e-22	0.316754	0.842	0.771	2.01e-18
Insr	1.35e-22	0.338656	0.57	0.434	2.42e-18
Podxl	1.41e-22	-0.31686	0.623	0.711	2.53e-18
Tmeff1	1.51e-22	0.367836	0.385	0.261	2.7e-18
Lama4	2.33e-22	-0.28927	0.067	0.163	4.17e-18
Mtss1	2.35e-22	-0.33147	0.206	0.333	4.2e-18
Prdm16	2.59e-22	-0.39157	0.132	0.242	4.65e-18
Ttyh2	2.92e-22	-0.35813	0.158	0.277	5.23e-18
Ldha	4.24e-22	-0.34366	0.625	0.71	7.59e-18
Psma3	5.52e-22	-0.30141	0.578	0.678	9.89e-18
Lrrc49	6.01e-22	-0.33154	0.14	0.255	1.08e-17
Hsp90b1	6.13e-22	-0.30891	0.751	0.83	1.1e-17
Tomm6	6.91e-22	-0.29761	0.578	0.676	1.24e-17
Lamtor4	8.05e-22	-0.31844	0.203	0.331	1.44e-17
Dpm3	9.81e-22	-0.30904	0.425	0.556	1.76e-17
Cox6b1	1.06e-21	-0.26423	0.777	0.844	1.9e-17
Mafk	1.08e-21	0.297635	0.221	0.121	1.94e-17
Uqcr11	1.1e-21	-0.26331	0.709	0.802	1.98e-17
Adipor2	1.1e-21	0.351033	0.595	0.481	1.98e-17
Tcea1	1.19e-21	-0.31461	0.44	0.565	2.13e-17
Scd2	1.31e-21	-0.3267	0.096	0.199	2.34e-17
Cdc14a	1.47e-21	0.331545	0.279	0.169	2.63e-17
Psmb9	1.54e-21	-0.32141	0.163	0.284	2.76e-17
Eif5a	1.75e-21	-0.31137	0.543	0.652	3.13e-17
Rnf125	1.85e-21	0.345733	0.512	0.387	3.32e-17
Ypel3	1.9e-21	-0.34306	0.33	0.455	3.4e-17
Herpud1	1.97e-21	0.337892	0.55	0.425	3.53e-17
Rpl35	2.32e-21	-0.24157	0.921	0.942	4.16e-17
Lrp8	2.76e-21	0.318097	0.657	0.55	4.94e-17
Hmg20b	3.76e-21	-0.36213	0.393	0.511	6.74e-17
Ddit4	4.35e-21	0.407972	0.507	0.386	7.8e-17
Rapgef6	4.6e-21	0.354573	0.462	0.342	8.24e-17
Csnk1e	4.73e-21	0.333333	0.406	0.285	8.48e-17
Ndufa5	5.07e-21	-0.31181	0.436	0.561	9.08e-17
Nfkbiz	5.77e-21	0.290212	0.171	0.085	1.03e-16
Cbx1	7.32e-21	-0.32555	0.427	0.558	1.31e-16
Ktn1	8.51e-21	-0.29249	0.582	0.695	1.52e-16
Cox6c	9.61e-21	-0.23852	0.888	0.923	1.72e-16
Grasp	1.08e-20	0.342375	0.703	0.591	1.94e-16
Slc50a1	1.14e-20	-0.32461	0.512	0.612	2.04e-16
Ier2	1.2e-20	0.128766	0.932	0.846	2.16e-16
Pglyrp1	1.22e-20	0.233218	0.973	0.959	2.18e-16
Gcnt2	1.32e-20	0.382153	0.496	0.386	2.36e-16
Tbc1d14	1.47e-20	0.310245	0.342	0.225	2.63e-16
Trib1	1.56e-20	0.310423	0.163	0.08	2.79e-16
Slc16a9	1.66e-20	0.365001	0.491	0.372	2.98e-16
Rpl4	1.9e-20	0.276428	0.808	0.724	3.4e-16
Txn1	2.08e-20	-0.28281	0.692	0.759	3.73e-16
Ubc	2.17e-20	0.257323	0.973	0.963	3.9e-16
Sf3b5	2.33e-20	-0.30926	0.224	0.348	4.17e-16
Gbp5	2.49e-20	-0.33625	0.142	0.252	4.47e-16
Psme2	2.7e-20	-0.34491	0.289	0.407	4.85e-16
Actg1	3.54e-20	0.20654	0.989	0.986	6.35e-16
Irf2bpl	3.9e-20	0.300316	0.654	0.536	6.99e-16
Plscr2	4.15e-20	-0.33351	0.087	0.181	7.44e-16
Uqcrq	4.23e-20	-0.30303	0.612	0.7	7.57e-16
Dusp6	4.69e-20	0.38845	0.552	0.439	8.4e-16
Ndufb4	5.63e-20	-0.29395	0.523	0.627	1.01e-15
AW112010	5.85e-20	-0.34481	0.501	0.619	1.05e-15
Eif1	8.1e-20	0.142353	0.999	0.998	1.45e-15
Timm10b	1.08e-19	-0.33813	0.315	0.434	1.94e-15
Atp5g2	1.1e-19	-0.2855	0.707	0.786	1.96e-15
Sdc3	1.18e-19	0.328165	0.382	0.267	2.11e-15
Cd83	1.19e-19	-0.27297	0.05	0.129	2.13e-15
Atp5g1	1.33e-19	-0.31421	0.373	0.489	2.39e-15
Per1	1.35e-19	0.304548	0.298	0.193	2.42e-15
Emcn	1.56e-19	-0.24153	0.897	0.923	2.8e-15
Ndufc1	1.77e-19	-0.31077	0.368	0.49	3.17e-15
H3f3a	1.86e-19	-0.19134	0.968	0.983	3.34e-15
Lims2	1.87e-19	0.320264	0.632	0.521	3.34e-15
Spry1	1.95e-19	0.322205	0.456	0.341	3.49e-15
Rnf187	2.17e-19	-0.32097	0.247	0.361	3.9e-15
Pttg1	2.57e-19	-0.32519	0.301	0.419	4.6e-15
Myrip	3.61e-19	0.228127	0.162	0.081	6.48e-15
Cox7a2l	4.22e-19	0.299753	0.714	0.623	7.55e-15
Fxyd5	4.5e-19	-0.29907	0.753	0.824	8.06e-15
S100a11	5.79e-19	-0.37694	0.303	0.417	1.04e-14
Smdt1	5.82e-19	-0.27206	0.642	0.734	1.04e-14
Eftud2	6.36e-19	0.308832	0.403	0.291	1.14e-14
Tmco1	6.39e-19	-0.2942	0.576	0.676	1.14e-14
Ndufa11	6.54e-19	-0.32603	0.397	0.506	1.17e-14
Irf2bp2	6.55e-19	0.292142	0.569	0.45	1.17e-14
Ndufb8	7.43e-19	-0.28749	0.457	0.565	1.33e-14
Ptp4a3	1.06e-18	-0.33331	0.139	0.239	1.91e-14
Gm9946	1.21e-18	-0.33815	0.12	0.219	2.17e-14
Picalm	1.23e-18	0.317351	0.606	0.505	2.21e-14
Prdx1	1.35e-18	-0.2856	0.738	0.8	2.43e-14
Pop5	1.39e-18	-0.30584	0.487	0.593	2.48e-14
Ubl5	1.65e-18	-0.25504	0.714	0.783	2.95e-14
Psma2	1.69e-18	-0.28476	0.52	0.623	3.03e-14
Klhl2	1.97e-18	0.311271	0.312	0.207	3.53e-14
Nkd1	2.19e-18	-0.33403	0.443	0.547	3.92e-14
Zbtb20	2.29e-18	0.249646	0.889	0.823	4.11e-14
Tomm7	2.32e-18	-0.23326	0.787	0.84	4.16e-14
Atp5k	2.8e-18	-0.27894	0.612	0.702	5.01e-14
Efr3b	2.98e-18	-0.33709	0.31	0.423	5.35e-14
Lmo7	3.08e-18	-0.34315	0.138	0.236	5.53e-14
Hlx	3.25e-18	-0.27994	0.056	0.133	5.83e-14
Plscr1	3.62e-18	-0.25889	0.05	0.127	6.49e-14
Fam181b	3.85e-18	-0.24903	0.032	0.099	6.9e-14
Tmsb10	4.12e-18	-0.42807	0.908	0.895	7.38e-14
Uqcr10	4.38e-18	-0.26065	0.592	0.686	7.86e-14
Rhob	4.72e-18	0.221749	0.954	0.92	8.46e-14
Mrpl17	4.76e-18	-0.29883	0.182	0.291	8.53e-14
Bcar3	4.78e-18	0.243531	0.142	0.07	8.56e-14
Milr1	4.9e-18	0.250966	0.11	0.047	8.77e-14
Bhlhe40	4.93e-18	0.325419	0.481	0.366	8.83e-14
Ptma	7.05e-18	-0.1936	0.998	0.996	1.26e-13
Ndufa1	7.64e-18	-0.2763	0.484	0.594	1.37e-13
Sf3b6	7.86e-18	-0.30286	0.305	0.414	1.41e-13
Taldo1	8.16e-18	-0.27537	0.535	0.639	1.46e-13
Mrps14	8.68e-18	-0.30251	0.349	0.463	1.56e-13
Cebpg	9.3e-18	0.310462	0.46	0.351	1.67e-13
Slfn2	9.53e-18	-0.28447	0.063	0.143	1.71e-13
Psmb3	9.58e-18	-0.28282	0.422	0.534	1.72e-13
Atp10a	1.04e-17	0.298053	0.701	0.61	1.86e-13
Ecscr	1.09e-17	-0.33379	0.193	0.3	1.95e-13
9930111J21Rik2	1.15e-17	-0.31751	0.234	0.348	2.06e-13
Osmr	1.16e-17	0.299072	0.317	0.213	2.08e-13
Lmcd1	1.34e-17	0.282155	0.174	0.094	2.4e-13
Snx10	1.66e-17	-0.22969	0.038	0.107	2.98e-13
Bst2	1.91e-17	-0.35808	0.448	0.551	3.42e-13
Rbpms	1.99e-17	0.30432	0.627	0.536	3.57e-13
Psma7	2.03e-17	-0.26441	0.645	0.745	3.65e-13
Hist1h4d	2.05e-17	0.299681	0.28	0.181	3.67e-13
Mrps21	2.28e-17	-0.28091	0.396	0.506	4.09e-13
Arid5a	2.88e-17	0.247981	0.159	0.084	5.17e-13
Smco4	3.21e-17	-0.28771	0.417	0.527	5.75e-13
Mrps12	3.64e-17	-0.28212	0.134	0.23	6.52e-13
Ccdc85b	3.79e-17	-0.24369	0.774	0.836	6.8e-13
Ptprb	3.8e-17	0.204031	0.984	0.965	6.8e-13
Wwc2	3.87e-17	0.280515	0.645	0.546	6.94e-13
Ets2	4.43e-17	-0.32607	0.256	0.364	7.93e-13
Gm11730	4.65e-17	0.118644	0.052	0.013	8.34e-13
Tek	4.68e-17	-0.24044	0.793	0.849	8.38e-13
Zic2	4.71e-17	-0.33201	0.359	0.463	8.43e-13
Spcs1	4.81e-17	-0.28418	0.312	0.427	8.63e-13
Alpl	4.85e-17	-0.38233	0.14	0.233	8.69e-13
Tiparp	6.44e-17	0.314938	0.189	0.108	1.15e-12
Adgrf5	6.9e-17	0.194807	0.967	0.949	1.24e-12
Fkbp3	7.16e-17	-0.30534	0.367	0.482	1.28e-12
Ndufs5	9.41e-17	-0.25151	0.609	0.696	1.69e-12
Hmgb1	9.7e-17	-0.17779	0.948	0.963	1.74e-12
Afap1l2	1.03e-16	-0.3144	0.178	0.277	1.85e-12
Fosl2	1.04e-16	0.276684	0.216	0.129	1.86e-12
Pdia3	1.15e-16	-0.27861	0.554	0.643	2.07e-12
Lamtor2	1.19e-16	-0.28511	0.394	0.507	2.13e-12
Kctd12b	1.28e-16	-0.3287	0.15	0.246	2.29e-12
Stx3	1.36e-16	0.288783	0.432	0.325	2.44e-12
Cuta	1.4e-16	-0.30447	0.309	0.42	2.51e-12
Skp1a	1.49e-16	-0.29523	0.408	0.509	2.68e-12
Maoa	1.54e-16	-0.26503	0.546	0.646	2.76e-12
1110004F10Rik	1.63e-16	-0.27351	0.432	0.543	2.93e-12
Rps27l	1.77e-16	-0.27937	0.504	0.593	3.16e-12
Prickle1	1.87e-16	-0.30339	0.19	0.293	3.34e-12
Gjc1	2.09e-16	0.288383	0.604	0.513	3.74e-12
2900026A02Rik	2.19e-16	0.324159	0.503	0.407	3.93e-12
Gm11808	2.26e-16	-0.29814	0.327	0.431	4.05e-12
Ncoa4	2.41e-16	-0.30285	0.255	0.361	4.32e-12
Rps27	2.92e-16	0.140424	0.999	0.997	5.23e-12
Prdx2	2.96e-16	-0.26517	0.533	0.623	5.3e-12
Sorbs3	2.97e-16	0.282882	0.367	0.261	5.32e-12
Ddc	3.43e-16	0.292974	0.65	0.548	6.14e-12
Klf4	3.44e-16	0.265371	0.95	0.912	6.17e-12
Coro2a	3.5e-16	0.162849	0.061	0.019	6.27e-12
Smtn	4.09e-16	0.28789	0.325	0.227	7.33e-12
Son	4.29e-16	-0.20023	0.936	0.952	7.69e-12
Pkn2	5.03e-16	-0.27656	0.422	0.535	9.01e-12
Hs3st1	5.61e-16	-0.26628	0.096	0.179	1.01e-11
Rpl27a	5.75e-16	0.129594	0.999	0.997	1.03e-11
Romo1	6.41e-16	-0.28621	0.366	0.474	1.15e-11
Pltp	6.91e-16	-0.14258	0.998	0.999	1.24e-11
Morf4l1	7.02e-16	-0.19143	0.887	0.92	1.26e-11
Ttpal	7.08e-16	0.171377	0.082	0.032	1.27e-11
Prpf4b	7.62e-16	-0.27664	0.556	0.654	1.36e-11
Atf4	8.27e-16	0.298969	0.52	0.418	1.48e-11
Rpl31	9.58e-16	0.198804	0.917	0.872	1.72e-11
Notum	9.94e-16	-0.28893	0.164	0.26	1.78e-11
Ahnak	1.08e-15	0.209484	0.917	0.868	1.93e-11
Nudcd3	1.14e-15	-0.26744	0.367	0.478	2.04e-11
Echs1	1.22e-15	-0.26867	0.156	0.251	2.19e-11
St5	1.26e-15	-0.2138	0.049	0.117	2.26e-11
Ppp1r18	1.28e-15	0.256869	0.207	0.126	2.29e-11
Tpgs2	1.38e-15	-0.24349	0.089	0.17	2.48e-11
Nedd8	1.43e-15	-0.22125	0.661	0.732	2.56e-11
Atp5md	1.55e-15	-0.25515	0.555	0.638	2.78e-11
Nampt	1.56e-15	-0.33541	0.321	0.422	2.79e-11
Plpp6	1.56e-15	0.276448	0.558	0.451	2.79e-11
Cdk4	1.58e-15	-0.23938	0.117	0.206	2.83e-11
Psmb2	1.59e-15	-0.29231	0.43	0.522	2.84e-11
Atpif1	1.62e-15	-0.29741	0.275	0.38	2.91e-11
Atp5g3	1.66e-15	-0.26014	0.407	0.51	2.98e-11
Cox5a	1.76e-15	-0.23994	0.685	0.761	3.16e-11
Stk17b	1.78e-15	0.257375	0.183	0.104	3.2e-11
Psmb6	1.81e-15	-0.27089	0.503	0.595	3.25e-11
Krtcap2	2.08e-15	-0.26132	0.538	0.635	3.72e-11
Timm13	2.24e-15	-0.27747	0.358	0.461	4.01e-11
Pgam1	2.36e-15	-0.2711	0.269	0.369	4.24e-11
Hadh	2.45e-15	-0.27468	0.232	0.334	4.38e-11
Snrpg	2.5e-15	-0.21584	0.713	0.785	4.49e-11
Ndufaf7	2.57e-15	0.28067	0.389	0.287	4.61e-11
Tob2	2.59e-15	0.284606	0.315	0.219	4.64e-11
Rwdd1	2.61e-15	-0.28778	0.363	0.472	4.68e-11
Cox7c	2.63e-15	-0.19105	0.873	0.906	4.71e-11
Pon2	2.8e-15	0.246334	0.702	0.615	5.01e-11
Fermt2	3.07e-15	0.198229	0.948	0.935	5.5e-11
Camk2n1	3.21e-15	0.291121	0.528	0.422	5.75e-11
Epb41	3.29e-15	0.263244	0.265	0.174	5.89e-11
Htr2a	3.49e-15	0.148027	0.067	0.023	6.25e-11
Denr	3.64e-15	-0.29127	0.266	0.367	6.51e-11
2023-09-07	3.79e-15	-0.23553	0.68	0.745	6.79e-11
Bloc1s1	3.97e-15	-0.28317	0.245	0.345	7.11e-11
Gm26802	4.18e-15	0.304247	0.348	0.248	7.5e-11
Gbp7	4.24e-15	-0.30313	0.319	0.423	7.6e-11
Fmo2	5.05e-15	0.455472	0.477	0.39	9.05e-11
Ostf1	5.38e-15	-0.22347	0.651	0.728	9.64e-11
Sptlc2	6.24e-15	-0.28911	0.208	0.307	1.12e-10
A030001D20Rik	7e-15	0.152651	0.081	0.032	1.26e-10
Eif4a2	7.14e-15	0.24319	0.664	0.565	1.28e-10
Sema6a	7.45e-15	-0.32623	0.283	0.382	1.34e-10
Depp1	7.62e-15	0.344351	0.358	0.259	1.37e-10
Jade2	7.92e-15	0.194064	0.136	0.071	1.42e-10
Calm1	8.05e-15	0.143528	0.997	0.996	1.44e-10
Adgrl3	8.13e-15	0.2628	0.234	0.15	1.46e-10
Cebpd	8.96e-15	0.313643	0.602	0.489	1.61e-10
Gfod1	9.08e-15	0.241959	0.162	0.091	1.63e-10
Aldoa	9.09e-15	-0.26577	0.63	0.708	1.63e-10
Phc1	9.48e-15	0.226836	0.194	0.115	1.7e-10
Myh9	9.94e-15	0.25837	0.786	0.717	1.78e-10
Slc1a1	1.12e-14	0.233254	0.762	0.667	2.01e-10
Ndufb11	1.23e-14	-0.24685	0.643	0.71	2.2e-10
Mafg	1.26e-14	0.251084	0.312	0.218	2.26e-10
Unc5b	1.28e-14	-0.26011	0.077	0.15	2.3e-10
Ppp1ca	1.51e-14	-0.25415	0.459	0.559	2.7e-10
Sema7a	1.55e-14	0.219165	0.783	0.701	2.79e-10
Iigp1	1.76e-14	-0.32188	0.176	0.27	3.15e-10
Zbtb8a	1.81e-14	0.200168	0.116	0.057	3.24e-10
Map7d1	1.87e-14	-0.29394	0.317	0.416	3.34e-10
Bmyc	1.95e-14	-0.2592	0.157	0.246	3.49e-10
Zranb2	2.03e-14	-0.27384	0.262	0.363	3.65e-10
Atp5l	2.15e-14	-0.21285	0.8	0.85	3.86e-10
Tle5	2.73e-14	-0.23553	0.656	0.721	4.89e-10
Ndufb1-ps	2.75e-14	-0.21164	0.62	0.712	4.93e-10
Ankrd37	2.76e-14	-0.3116	0.123	0.207	4.95e-10
Ddx5	2.83e-14	0.166667	0.978	0.963	5.08e-10
Mtln	2.85e-14	-0.26921	0.163	0.255	5.1e-10
Set	2.85e-14	-0.26502	0.44	0.536	5.11e-10
Sarnp	3.06e-14	-0.27127	0.395	0.489	5.48e-10
Xpo1	3.14e-14	-0.22094	0.081	0.156	5.63e-10
Rpl28	3.21e-14	0.147084	0.993	0.989	5.75e-10
Sort1	3.52e-14	0.22688	0.286	0.194	6.3e-10
Rasal2	4.46e-14	0.302344	0.502	0.414	8e-10
Rasd1	4.51e-14	0.469549	0.334	0.245	8.08e-10
Rtp4	4.52e-14	-0.28241	0.128	0.21	8.1e-10
Sptan1	5.26e-14	0.229361	0.819	0.748	9.43e-10
Clk1	5.28e-14	0.254643	0.713	0.634	9.46e-10
Midn	5.53e-14	0.267471	0.36	0.263	9.91e-10
Igfbp7	6.21e-14	-0.2145	0.986	0.989	1.11e-09
Psma1	6.29e-14	-0.24615	0.328	0.429	1.13e-09
Ppid	6.38e-14	-0.24796	0.19	0.285	1.14e-09
Runx1t1	6.71e-14	-0.17919	0.013	0.056	1.2e-09
Pnn	7.13e-14	-0.26542	0.384	0.483	1.28e-09
Lima1	7.78e-14	-0.25489	0.382	0.482	1.39e-09
Angpt2	8.04e-14	0.249781	0.109	0.054	1.44e-09
Gm15270	8.56e-14	0.228761	0.13	0.069	1.53e-09
Spred2	8.67e-14	0.245559	0.274	0.188	1.55e-09
Srsf9	9.89e-14	-0.24635	0.34	0.438	1.77e-09
Gbp4	9.95e-14	-0.23171	0.054	0.118	1.78e-09
Tcp11l2	1.01e-13	0.238796	0.241	0.157	1.8e-09
Tcf4	1.02e-13	0.180611	0.958	0.95	1.83e-09
Tpd52l1	1.08e-13	-0.25213	0.119	0.2	1.94e-09
Mmp15	1.09e-13	-0.19882	0.05	0.113	1.96e-09
Hells	1.14e-13	-0.17461	0.016	0.062	2.05e-09
Osbpl1a	1.14e-13	-0.27832	0.537	0.626	2.05e-09
Arf5	1.21e-13	-0.23646	0.547	0.639	2.17e-09
Ndufa13	1.23e-13	-0.22682	0.615	0.695	2.2e-09
Hipk3	1.23e-13	0.243301	0.417	0.316	2.2e-09
Tm2d2	1.23e-13	-0.26291	0.223	0.315	2.21e-09
Eif3c	1.3e-13	-0.24643	0.531	0.617	2.32e-09
Sh3bgrl3	1.33e-13	-0.22114	0.706	0.764	2.38e-09
Pdgfb	1.42e-13	-0.22595	0.652	0.723	2.54e-09
Lao1	1.42e-13	0.086209	0.026	0.004	2.55e-09
Pdcd4	1.48e-13	0.3197	0.372	0.282	2.65e-09
Xaf1	1.72e-13	-0.29023	0.278	0.375	3.09e-09
Mrpl52	1.74e-13	-0.2775	0.296	0.388	3.12e-09
B3gnt2	1.74e-13	-0.25863	0.585	0.665	3.12e-09
Psmb1	1.92e-13	-0.22725	0.579	0.662	3.44e-09
Cnpy2	1.93e-13	-0.23122	0.203	0.299	3.45e-09
Prkacb	1.95e-13	0.27577	0.445	0.348	3.5e-09
Slco1a4	2.09e-13	-0.14493	0.988	0.992	3.74e-09
Heg1	2.13e-13	0.257848	0.615	0.517	3.82e-09
Dok4	2.17e-13	-0.21631	0.074	0.144	3.88e-09
Rpl18a	2.2e-13	0.139935	0.994	0.994	3.94e-09
Mgst3	3.17e-13	-0.21998	0.131	0.215	5.68e-09
Ppib	3.19e-13	-0.22009	0.728	0.787	5.72e-09
Ndufb10	3.23e-13	-0.25216	0.454	0.535	5.79e-09
Arhgef15	3.31e-13	-0.26925	0.22	0.308	5.93e-09
Acacb	3.43e-13	0.191797	0.141	0.078	6.14e-09
Upf2	3.56e-13	-0.27059	0.257	0.351	6.37e-09
Vstm2b	3.64e-13	0.266355	0.139	0.077	6.53e-09
Arglu1	3.73e-13	-0.2502	0.57	0.643	6.68e-09
Klf15	3.93e-13	0.085186	0.03	0.005	7.04e-09
Cdk5rap1	4.75e-13	-0.14547	0.013	0.054	8.51e-09
Dcbld2	4.89e-13	0.196157	0.12	0.063	8.77e-09
4931406P16Rik	5.13e-13	0.210724	0.881	0.849	9.19e-09
Aqp11	5.4e-13	0.275095	0.55	0.461	9.68e-09
Rassf9	5.88e-13	-0.24453	0.282	0.377	1.05e-08
Hint2	6.1e-13	-0.25647	0.234	0.325	1.09e-08
Ddt	6.13e-13	-0.24961	0.168	0.254	1.1e-08
Psma4	6.24e-13	-0.26243	0.36	0.457	1.12e-08
Nme1	6.81e-13	-0.23627	0.208	0.299	1.22e-08
Far2	6.89e-13	-0.21326	0.094	0.167	1.23e-08
Lsm7	7.37e-13	-0.24359	0.151	0.234	1.32e-08
Pkp4	8.14e-13	0.247157	0.395	0.302	1.46e-08
Ssb	8.28e-13	-0.23987	0.579	0.65	1.48e-08
Klf6	9.27e-13	0.236055	0.898	0.857	1.66e-08
Dennd3	9.85e-13	0.253531	0.288	0.206	1.76e-08
Ifit3b	1.08e-12	-0.18215	0.029	0.079	1.93e-08
Arap2	1.2e-12	-0.2632	0.469	0.553	2.15e-08
mt-Nd6	1.29e-12	0.216602	0.181	0.112	2.32e-08
Ptpn14	1.39e-12	0.212348	0.2	0.127	2.49e-08
Zfp52	1.45e-12	0.20419	0.131	0.072	2.6e-08
Ddx21	1.49e-12	-0.26414	0.226	0.315	2.67e-08
Palmd	1.49e-12	0.189574	0.902	0.863	2.68e-08
Zfp329	1.53e-12	-0.22751	0.096	0.167	2.74e-08
Sugt1	1.55e-12	-0.25202	0.398	0.482	2.78e-08
Mrpl20	1.58e-12	-0.22597	0.312	0.41	2.83e-08
Nol7	1.72e-12	-0.28062	0.5	0.588	3.08e-08
Psmb5	1.84e-12	-0.24345	0.409	0.497	3.3e-08
Aurkaip1	1.89e-12	-0.25476	0.285	0.378	3.39e-08
Serpine2	1.93e-12	0.25519	0.158	0.094	3.47e-08
Rex1bd	1.94e-12	-0.24662	0.218	0.312	3.48e-08
Rfc1	1.96e-12	-0.27621	0.217	0.304	3.52e-08
Oaz1	2.03e-12	-0.17423	0.863	0.883	3.64e-08
Polr2l	2.07e-12	-0.21334	0.082	0.149	3.7e-08
Rps17	2.07e-12	0.166239	0.935	0.899	3.71e-08
Itgb1	2.19e-12	-0.21749	0.769	0.807	3.92e-08
Prorsd1	2.3e-12	-0.21725	0.071	0.136	4.12e-08
Rpl14	2.49e-12	0.161229	0.935	0.91	4.47e-08
Lhfpl2	2.53e-12	-0.24601	0.153	0.235	4.53e-08
1810058I24Rik	2.61e-12	-0.23042	0.244	0.335	4.68e-08
Litaf	2.69e-12	0.164865	0.091	0.043	4.83e-08
Map3k1	2.82e-12	-0.2371	0.289	0.388	5.05e-08
Ywhab	2.82e-12	-0.21572	0.667	0.732	5.06e-08
P4ha2	2.82e-12	0.178556	0.128	0.07	5.06e-08
Usp53	2.93e-12	-0.24896	0.249	0.34	5.25e-08
Coq10b	2.99e-12	0.244669	0.326	0.238	5.37e-08
Mettl26	3.16e-12	-0.21121	0.075	0.141	5.66e-08
Notch4	3.33e-12	0.280846	0.316	0.233	5.96e-08
Atp5h	3.63e-12	-0.17165	0.837	0.872	6.5e-08
Cfap36	3.67e-12	-0.2125	0.116	0.191	6.57e-08
Snw1	3.8e-12	-0.24119	0.297	0.387	6.81e-08
Cox7a2	4e-12	-0.17909	0.803	0.833	7.17e-08
Ubl3	4.12e-12	0.219402	0.692	0.609	7.39e-08
Cmtm8	4.3e-12	-0.21727	0.658	0.721	7.7e-08
Apod	4.55e-12	0.272245	0.302	0.22	8.15e-08
Gm26632	4.57e-12	0.150577	0.085	0.04	8.19e-08
Mrps33	4.57e-12	-0.24366	0.411	0.501	8.19e-08
Sdhaf4	4.66e-12	-0.21252	0.126	0.202	8.34e-08
Ndufb2	4.77e-12	-0.23376	0.385	0.474	8.55e-08
Rarg	4.81e-12	-0.20714	0.083	0.149	8.62e-08
Anxa5	4.98e-12	-0.2153	0.697	0.75	8.93e-08
Mef2c	5.11e-12	-0.2455	0.422	0.512	9.16e-08
Atp5d	5.21e-12	-0.22434	0.563	0.638	9.33e-08
Tmem14c	5.34e-12	-0.2245	0.432	0.52	9.57e-08
Exosc7	5.36e-12	-0.22612	0.13	0.205	9.61e-08
Bcam	5.54e-12	-0.2322	0.481	0.57	9.93e-08
Mrps16	5.83e-12	-0.20945	0.18	0.265	1.05e-07
Crnkl1	5.92e-12	-0.22925	0.11	0.182	1.06e-07
H2-K1	6.21e-12	-0.22043	0.723	0.772	1.11e-07
Tpi1	6.24e-12	-0.2339	0.361	0.456	1.12e-07
Ran	6.24e-12	-0.243	0.444	0.523	1.12e-07
Arid4a	6.36e-12	-0.26372	0.314	0.407	1.14e-07
Rin3	6.51e-12	0.239354	0.218	0.145	1.17e-07
St13	6.55e-12	-0.2365	0.54	0.613	1.17e-07
Ndufb9	6.64e-12	-0.21913	0.554	0.632	1.19e-07
Arl6ip1	6.81e-12	-0.2205	0.616	0.686	1.22e-07
Gtf2h5	6.96e-12	-0.24	0.366	0.459	1.25e-07
Hmgcl	6.97e-12	0.224182	0.23	0.154	1.25e-07
Eif2b3	7.52e-12	-0.19617	0.045	0.1	1.35e-07
Adamts9	7.71e-12	0.141958	0.075	0.033	1.38e-07
Asb4	8.06e-12	0.312229	0.19	0.124	1.45e-07
Socs3	8.94e-12	0.229528	0.285	0.201	1.6e-07
Gclm	8.95e-12	-0.23375	0.351	0.445	1.6e-07
Nap1l1	1.06e-11	-0.25636	0.458	0.54	1.89e-07
Polr3k	1.06e-11	-0.22228	0.087	0.152	1.9e-07
Ube2e3	1.08e-11	-0.23153	0.254	0.342	1.94e-07
Hspa1a	1.11e-11	0.361317	0.649	0.575	1.98e-07
Gm11827	1.15e-11	0.099922	0.044	0.014	2.05e-07
Sox18	1.16e-11	-0.20257	0.613	0.698	2.08e-07
Eci1	1.16e-11	-0.22807	0.167	0.249	2.08e-07
Car4	1.21e-11	-0.25672	0.866	0.86	2.16e-07
Dhx36	1.22e-11	-0.24503	0.276	0.366	2.18e-07
Lamtor5	1.28e-11	-0.23986	0.391	0.473	2.3e-07
Tdrp	1.33e-11	-0.2499	0.496	0.575	2.38e-07
Cyba	1.48e-11	-0.22456	0.47	0.554	2.66e-07
Kcnab1	1.52e-11	0.071204	0.023	0.004	2.73e-07
Ndufab1	1.59e-11	-0.22677	0.383	0.473	2.86e-07
Knop1	1.7e-11	-0.29511	0.289	0.37	3.04e-07
Snrpb	1.76e-11	-0.21654	0.627	0.684	3.16e-07
Iscu	1.86e-11	-0.23947	0.317	0.411	3.33e-07
Chst2	1.99e-11	0.19793	0.148	0.088	3.56e-07
Fubp1	2e-11	-0.23272	0.335	0.425	3.58e-07
Cavin3	2.01e-11	-0.26721	0.275	0.36	3.6e-07
Ier5	2.08e-11	0.288322	0.551	0.473	3.73e-07
Vdac2	2.08e-11	-0.21283	0.524	0.604	3.73e-07
Nr4a2	2.13e-11	0.202158	0.193	0.123	3.81e-07
Gja1	2.14e-11	0.246016	0.268	0.19	3.84e-07
Ckb	2.16e-11	-0.23179	0.154	0.232	3.87e-07
Epha4	2.2e-11	-0.23928	0.218	0.305	3.95e-07
Ackr3	2.25e-11	0.284189	0.351	0.268	4.03e-07
Lage3	2.25e-11	-0.22208	0.146	0.221	4.04e-07
Tmem258	2.31e-11	-0.23091	0.281	0.367	4.13e-07
Ostc	2.35e-11	-0.22252	0.244	0.329	4.21e-07
Pnkd	2.44e-11	-0.23608	0.374	0.462	4.37e-07
As3mt	2.5e-11	-0.19876	0.107	0.178	4.48e-07
Mpzl1	2.61e-11	-0.21446	0.56	0.632	4.68e-07
Ppfibp1	2.64e-11	0.217016	0.669	0.588	4.74e-07
Rgs3	2.65e-11	-0.23012	0.175	0.254	4.76e-07
Map1lc3a	2.67e-11	-0.24206	0.55	0.62	4.78e-07
Vamp5	2.83e-11	-0.22647	0.311	0.402	5.07e-07
Psmd3	2.93e-11	-0.20838	0.162	0.24	5.25e-07
Ddi1	3.04e-11	0.088678	0.034	0.009	5.45e-07
Stard10	3.11e-11	-0.16759	0.053	0.109	5.57e-07
Fdps	3.23e-11	-0.22287	0.16	0.237	5.79e-07
Gpr146	3.4e-11	0.234584	0.57	0.491	6.09e-07
Gamt	3.67e-11	-0.15938	0.044	0.096	6.58e-07
Mrpl18	3.7e-11	-0.22329	0.189	0.27	6.63e-07
Chd4	3.81e-11	-0.24431	0.358	0.448	6.82e-07
Nsd1	4.07e-11	-0.22424	0.334	0.421	7.29e-07
Ssbp4	4.09e-11	-0.22821	0.436	0.522	7.33e-07
Vcl	4.11e-11	0.265909	0.351	0.269	7.36e-07
Prdx5	4.15e-11	-0.20609	0.168	0.248	7.43e-07
Gbp9	4.63e-11	-0.23362	0.125	0.196	8.3e-07
Acox1	4.67e-11	0.242774	0.324	0.246	8.36e-07
Tgfbr2	4.73e-11	-0.24411	0.461	0.543	8.47e-07
Gnb1	4.89e-11	-0.1886	0.732	0.774	8.77e-07
Tns2	4.9e-11	0.214037	0.348	0.263	8.78e-07
Erh	4.95e-11	-0.19249	0.111	0.181	8.87e-07
Tacc2	5.01e-11	0.194697	0.139	0.082	8.98e-07
Rps11	5.19e-11	0.171861	0.961	0.939	9.31e-07
Ddx46	5.51e-11	-0.22257	0.225	0.312	9.88e-07
Rpl10	5.76e-11	0.161646	0.947	0.914	1.03e-06
Wdr83os	5.83e-11	-0.21731	0.234	0.318	1.04e-06
Atp6v1f	5.93e-11	-0.17436	0.602	0.674	1.06e-06
Mef2d	6.11e-11	0.225829	0.278	0.203	1.09e-06
Gltp	6.23e-11	0.264958	0.385	0.303	1.12e-06
Fcgrt	6.24e-11	-0.18837	0.767	0.821	1.12e-06
Car2	6.29e-11	-0.23317	0.303	0.387	1.13e-06
Sirt7	6.32e-11	-0.21754	0.131	0.203	1.13e-06
Ndufb3	6.42e-11	-0.20919	0.477	0.558	1.15e-06
Chchd1	6.44e-11	-0.20575	0.231	0.32	1.15e-06
Nr3c1	6.83e-11	-0.20813	0.534	0.61	1.22e-06
Ndufs7	6.89e-11	-0.23252	0.381	0.467	1.24e-06
Psmb10	6.94e-11	-0.24815	0.299	0.382	1.24e-06
Ap2b1	7.26e-11	-0.21717	0.531	0.605	1.3e-06
Rpl23	7.28e-11	0.118557	0.997	0.995	1.31e-06
Serbp1	7.41e-11	-0.19982	0.791	0.816	1.33e-06
Eif3a	7.59e-11	-0.23277	0.532	0.609	1.36e-06
Tnik	7.69e-11	0.133717	0.063	0.027	1.38e-06
Polr2i	8.05e-11	-0.22631	0.193	0.272	1.44e-06
Coro2b	8.07e-11	0.20602	0.208	0.138	1.45e-06
6720427I07Rik	8.08e-11	0.134829	0.077	0.036	1.45e-06
Pomp	8.08e-11	-0.17982	0.881	0.903	1.45e-06
Pla2g4a	8.28e-11	-0.1591	0.04	0.089	1.48e-06
Fibp	8.29e-11	-0.2162	0.177	0.254	1.49e-06
Wdr43	8.71e-11	-0.24013	0.165	0.241	1.56e-06
Hcfc1r1	8.88e-11	-0.22037	0.34	0.428	1.59e-06
Ppp2r2d	8.96e-11	0.246534	0.564	0.483	1.61e-06
Ivns1abp	9.06e-11	0.294532	0.579	0.506	1.62e-06
Rab31	9.12e-11	0.166135	0.128	0.074	1.64e-06
Grpel1	9.47e-11	-0.23208	0.252	0.335	1.7e-06
Tmx2	1.03e-10	-0.1778	0.085	0.15	1.84e-06
Dut	1.09e-10	-0.15165	0.043	0.093	1.96e-06
Lamp1	1.15e-10	-0.20418	0.688	0.742	2.05e-06
Pgrmc2	1.2e-10	-0.19107	0.191	0.273	2.15e-06
Rpn1	1.2e-10	-0.20822	0.229	0.313	2.15e-06
Eml4	1.21e-10	-0.20625	0.106	0.173	2.17e-06
Mrps24	1.23e-10	-0.22497	0.407	0.492	2.2e-06
Ctsz	1.35e-10	-0.21281	0.254	0.343	2.42e-06
Ddx50	1.42e-10	0.193669	0.654	0.567	2.55e-06
Sh3rf1	1.46e-10	-0.21902	0.095	0.157	2.61e-06
Bcl2	1.5e-10	0.186077	0.15	0.091	2.69e-06
Rgl1	1.52e-10	-0.22993	0.226	0.311	2.73e-06
Cetn3	1.57e-10	-0.23052	0.534	0.607	2.82e-06
Tubb2b	1.74e-10	0.105085	0.037	0.011	3.12e-06
Ier5l	1.75e-10	0.228539	0.34	0.258	3.14e-06
Ifit3	1.77e-10	-0.23456	0.07	0.128	3.17e-06
Senp6	1.86e-10	-0.24067	0.309	0.39	3.33e-06
Ints11	1.87e-10	-0.16729	0.064	0.12	3.34e-06
Dad1	1.98e-10	-0.21128	0.521	0.602	3.54e-06
Psmd8	2.13e-10	-0.21853	0.344	0.429	3.82e-06
Rps19	2.22e-10	0.112316	0.992	0.99	3.98e-06
Cdc40	2.3e-10	-0.23151	0.166	0.236	4.13e-06
Glcci1	2.3e-10	-0.24353	0.127	0.195	4.13e-06
Lyn	2.31e-10	-0.24844	0.206	0.28	4.14e-06
Por	2.37e-10	0.278962	0.352	0.277	4.25e-06
Dnaja1	2.4e-10	-0.17565	0.803	0.85	4.3e-06
Bnip3	2.51e-10	0.266054	0.378	0.299	4.5e-06
Gpr155	2.77e-10	-0.19399	0.172	0.25	4.96e-06
Lsm6	2.83e-10	-0.20406	0.228	0.308	5.08e-06
Cirbp	2.86e-10	-0.21095	0.233	0.313	5.13e-06
Elovl7	3e-10	0.229214	0.59	0.508	5.37e-06
Tbx3	3.03e-10	-0.26826	0.385	0.458	5.43e-06
Hnrnpk	3.18e-10	-0.18349	0.743	0.787	5.69e-06
Pigyl	3.66e-10	-0.20729	0.103	0.165	6.56e-06
Errfi1	3.72e-10	0.186902	0.168	0.107	6.66e-06
Lims1	3.74e-10	-0.2297	0.324	0.408	6.69e-06
Retreg1	3.75e-10	0.258857	0.222	0.155	6.72e-06
Nmi	3.94e-10	-0.209	0.164	0.238	7.06e-06
Tmem126a	3.98e-10	-0.18312	0.087	0.147	7.14e-06
Plcg1	4.1e-10	0.209816	0.412	0.329	7.35e-06
Vps36	4.11e-10	-0.2167	0.36	0.444	7.37e-06
Cisd1	4.14e-10	-0.21247	0.206	0.283	7.43e-06
Irf8	4.2e-10	0.053013	0.017	0.002	7.53e-06
Gapdh	4.7e-10	-0.19754	0.696	0.748	8.43e-06
Selenoh	4.79e-10	-0.17895	0.152	0.225	8.58e-06
Rpl36al	4.82e-10	-0.19217	0.629	0.707	8.64e-06
Ech1	5.02e-10	-0.22117	0.475	0.547	9e-06
Cope	5.05e-10	-0.21815	0.312	0.391	9.05e-06
Kdm6b	5.06e-10	0.231745	0.196	0.133	9.06e-06
Sacs	5.06e-10	-0.16655	0.039	0.085	9.07e-06
Ciart	5.2e-10	0.107387	0.068	0.031	9.32e-06
Ppp1r2	5.26e-10	0.19782	0.75	0.702	9.43e-06
Ncbp2	5.47e-10	-0.19403	0.08	0.137	9.8e-06
Vsig2	5.56e-10	0.166665	0.158	0.099	9.97e-06
Bach1	5.59e-10	0.223427	0.338	0.261	1e-05
Cdk19	5.87e-10	-0.25667	0.17	0.242	1.05e-05
Pxn	6.01e-10	0.208462	0.293	0.217	1.08e-05
Slc7a5	6.14e-10	0.157519	0.93	0.907	1.1e-05
Sdhaf1	6.7e-10	-0.1885	0.132	0.2	1.2e-05
Polr2f	7.18e-10	-0.19369	0.273	0.356	1.29e-05
Slc26a10	7.21e-10	-0.21489	0.03	0.071	1.29e-05
Dhrs7	7.38e-10	-0.19483	0.256	0.336	1.32e-05
Slco2b1	7.53e-10	0.245288	0.468	0.391	1.35e-05
Tcea3	7.7e-10	-0.14735	0.025	0.064	1.38e-05
Triap1	7.72e-10	-0.18964	0.131	0.199	1.38e-05
Mrpl42	7.75e-10	-0.21151	0.198	0.275	1.39e-05
Rnh1	8.02e-10	-0.21334	0.25	0.333	1.44e-05
Metap2	8.1e-10	-0.2208	0.516	0.586	1.45e-05
2023-03-02	8.22e-10	-0.19559	0.382	0.465	1.47e-05
Gm34455	8.3e-10	0.236948	0.214	0.149	1.49e-05
Gadd45b	8.48e-10	0.246983	0.227	0.158	1.52e-05
Unc13c	8.5e-10	-0.1482	0.038	0.084	1.52e-05
Gm12758	8.51e-10	0.190964	0.147	0.093	1.53e-05
Fcho2	8.8e-10	-0.24071	0.59	0.643	1.58e-05
Med30	8.91e-10	-0.20013	0.14	0.209	1.6e-05
Xrn2	8.92e-10	-0.21976	0.262	0.343	1.6e-05
Smap1	8.93e-10	-0.1972	0.558	0.625	1.6e-05
Cables1	8.94e-10	0.165464	0.106	0.06	1.6e-05
Fam174a	9.24e-10	-0.2041	0.317	0.399	1.66e-05
Otulin	9.68e-10	-0.21516	0.134	0.202	1.73e-05
Rpa3	9.73e-10	-0.18503	0.102	0.165	1.74e-05
Pmepa1	9.82e-10	-0.22644	0.438	0.518	1.76e-05
Snrpe	1e-09	-0.19346	0.512	0.588	1.79e-05
Rnaseh2c	1.01e-09	-0.21957	0.35	0.434	1.8e-05
A330023F24Rik	1.01e-09	0.100454	0.044	0.016	1.81e-05
Gsk3b	1.01e-09	-0.19587	0.609	0.667	1.82e-05
Mecom	1.03e-09	0.220073	0.791	0.745	1.84e-05
Tspan5	1.03e-09	-0.20377	0.598	0.652	1.85e-05
Helz2	1.04e-09	0.176363	0.187	0.125	1.86e-05
Stk38	1.06e-09	-0.2386	0.396	0.474	1.91e-05
Rpp25l	1.11e-09	-0.18131	0.12	0.185	1.99e-05
Kdm1a	1.11e-09	-0.21649	0.238	0.317	1.99e-05
Irf7	1.16e-09	-0.23525	0.136	0.203	2.08e-05
Wfdc1	1.21e-09	0.17586	0.848	0.815	2.17e-05
Scp2	1.24e-09	-0.21038	0.513	0.588	2.22e-05
Ndufs8	1.26e-09	-0.20237	0.208	0.282	2.25e-05
Cfdp1	1.28e-09	-0.2036	0.295	0.378	2.29e-05
Bms1	1.29e-09	-0.17908	0.126	0.194	2.32e-05
Cthrc1	1.33e-09	-0.20854	0.069	0.122	2.39e-05
Robo4	1.46e-09	0.231042	0.602	0.535	2.62e-05
Trmt112	1.53e-09	-0.22071	0.216	0.29	2.74e-05
Copz2	1.56e-09	-0.20236	0.179	0.251	2.8e-05
Qsox1	1.57e-09	0.197951	0.226	0.16	2.81e-05
Svbp	1.6e-09	-0.20902	0.18	0.252	2.87e-05
Ube2n	1.64e-09	-0.21041	0.292	0.372	2.94e-05
Brd2	1.65e-09	0.237106	0.459	0.382	2.95e-05
Spaar	1.68e-09	-0.22657	0.122	0.185	3.02e-05
Laptm4b	1.69e-09	-0.16115	0.054	0.104	3.04e-05
Aldh4a1	1.71e-09	-0.16918	0.057	0.106	3.06e-05
Mospd1	1.71e-09	-0.20763	0.225	0.304	3.06e-05
Pcmtd1	1.75e-09	-0.18317	0.716	0.775	3.14e-05
Wapl	1.78e-09	-0.22507	0.331	0.407	3.19e-05
Ube2b	1.84e-09	0.200987	0.668	0.599	3.3e-05
Xist	1.86e-09	-0.25255	0.158	0.232	3.33e-05
Mrpl23	1.88e-09	-0.19492	0.165	0.238	3.36e-05
Nt5c2	1.96e-09	0.186534	0.31	0.233	3.51e-05
Snrpf	2e-09	-0.17538	0.441	0.525	3.58e-05
Mrpl55	2.03e-09	-0.18476	0.136	0.204	3.64e-05
Nrep	2.03e-09	-0.16859	0.083	0.139	3.64e-05
Wee1	2.07e-09	0.146544	0.081	0.042	3.7e-05
Mvk	2.09e-09	-0.15156	0.046	0.092	3.74e-05
Ndufaf3	2.11e-09	-0.20312	0.128	0.192	3.78e-05
Rpl32	2.11e-09	0.116472	0.99	0.987	3.78e-05
Nop10	2.12e-09	-0.21481	0.356	0.431	3.79e-05
Mtdh	2.13e-09	-0.20402	0.472	0.546	3.81e-05
Qk	2.14e-09	-0.15938	0.874	0.897	3.83e-05
Eef2	2.16e-09	0.165811	0.793	0.742	3.87e-05
Naa38	2.17e-09	-0.21387	0.285	0.364	3.89e-05
Mdh1	2.17e-09	-0.20001	0.207	0.283	3.9e-05
Tsix	2.28e-09	-0.12857	0.023	0.06	4.09e-05
Dnajc19	2.31e-09	-0.19732	0.198	0.273	4.15e-05
Gde1	2.44e-09	0.222171	0.437	0.361	4.37e-05
Acp1	2.44e-09	-0.20524	0.223	0.298	4.38e-05
Tada2a	2.48e-09	-0.1688	0.05	0.097	4.44e-05
Idi1	2.53e-09	-0.19618	0.102	0.163	4.53e-05
Crip2	2.54e-09	-0.15674	0.936	0.931	4.56e-05
Ilf2	2.56e-09	-0.19845	0.132	0.196	4.59e-05
Psmd14	2.58e-09	-0.20309	0.15	0.217	4.63e-05
Gm32036	2.61e-09	0.091852	0.04	0.014	4.67e-05
Rps16	2.63e-09	0.103361	0.996	0.996	4.71e-05
4921524J17Rik	2.71e-09	-0.21122	0.309	0.389	4.86e-05
Plaat3	2.93e-09	-0.2118	0.256	0.328	5.25e-05
Alox12	2.93e-09	-0.09988	0.007	0.035	5.25e-05
Mpc2	2.97e-09	-0.22717	0.313	0.386	5.32e-05
Ndufaf8	3e-09	-0.1783	0.214	0.292	5.38e-05
Fkbp1a	3.02e-09	-0.19958	0.644	0.702	5.41e-05
Ascc3	3.03e-09	-0.2028	0.152	0.219	5.43e-05
C1d	3.05e-09	-0.19629	0.19	0.263	5.47e-05
Pcm1	3.19e-09	-0.20787	0.357	0.435	5.71e-05
Akr1b3	3.2e-09	-0.16715	0.103	0.164	5.74e-05
Dctn6	3.26e-09	-0.22153	0.284	0.355	5.84e-05
Mff	3.28e-09	-0.22521	0.382	0.451	5.87e-05
Hmgn2	3.32e-09	-0.17285	0.108	0.17	5.96e-05
Myl12b	3.5e-09	-0.13756	0.937	0.957	6.28e-05
Krtap28-13	3.63e-09	-0.18061	0.017	0.051	6.51e-05
Dpy30	3.65e-09	-0.18541	0.195	0.27	6.54e-05
Luzp1	3.69e-09	-0.16975	0.736	0.77	6.62e-05
Stt3b	3.76e-09	0.205192	0.238	0.172	6.74e-05
Cbr1	3.78e-09	-0.17218	0.135	0.2	6.78e-05
Adgrl2	3.81e-09	-0.19868	0.462	0.537	6.83e-05
Pkm	3.89e-09	-0.19461	0.649	0.7	6.97e-05
Ica1l	3.92e-09	0.122612	0.062	0.029	7.02e-05
Emc2	3.99e-09	-0.21691	0.326	0.404	7.15e-05
Brd9	4.12e-09	-0.21152	0.387	0.465	7.38e-05
Hlf	4.18e-09	0.220266	0.186	0.128	7.49e-05
Nucks1	4.28e-09	-0.20487	0.54	0.604	7.67e-05
Commd6	4.31e-09	-0.20087	0.182	0.253	7.72e-05
Bola2	4.5e-09	-0.17909	0.238	0.315	8.06e-05
Eif4ebp1	4.56e-09	0.170291	0.155	0.101	8.18e-05
Dennd1b	4.57e-09	0.151306	0.132	0.082	8.19e-05
Pet100	4.7e-09	-0.21553	0.277	0.354	8.42e-05
Mtx2	4.84e-09	-0.18111	0.087	0.143	8.67e-05
Zdhhc20	4.92e-09	0.207088	0.309	0.238	8.82e-05
Pdia6	4.94e-09	-0.20248	0.407	0.483	8.85e-05
Wasf2	5.16e-09	0.167026	0.828	0.781	9.25e-05
Samd9l	5.18e-09	-0.21199	0.21	0.283	9.29e-05
Flt1	5.21e-09	0.089959	1	1	9.33e-05
Crybb3	5.21e-09	0.091008	0.054	0.023	9.33e-05
Ninj1	5.25e-09	-0.17526	0.124	0.187	9.41e-05
Chmp2a	5.31e-09	-0.16308	0.609	0.675	9.52e-05
Kcnq1ot1	5.35e-09	0.210792	0.194	0.134	9.58e-05
Foxo3	5.5e-09	0.173126	0.154	0.101	9.86e-05
Lonp2	5.52e-09	-0.22019	0.155	0.221	9.89e-05
Luc7l3	5.59e-09	-0.21833	0.288	0.36	0.0001
Sigirr	5.79e-09	-0.19181	0.165	0.233	0.000104
Thoc7	5.85e-09	-0.17018	0.284	0.366	0.000105
Ppdpf	5.97e-09	-0.2246	0.286	0.356	0.000107
Itih5	6.1e-09	0.15876	0.89	0.833	0.000109
0610012G03Rik	6.25e-09	-0.19448	0.281	0.36	0.000112
Sqor	6.32e-09	-0.15044	0.087	0.144	0.000113
Hspa4	6.36e-09	-0.18913	0.236	0.313	0.000114
Zyx	6.43e-09	0.175445	0.166	0.11	0.000115
Epha2	6.47e-09	0.116939	0.079	0.041	0.000116
Yaf2	6.99e-09	-0.20477	0.244	0.315	0.000125
Arhgap20	7.14e-09	-0.09923	0.01	0.038	0.000128
Mrpl21	7.36e-09	-0.21652	0.157	0.223	0.000132
Ahsa1	7.43e-09	-0.18748	0.167	0.235	0.000133
Slc25a39	7.55e-09	-0.1814	0.113	0.173	0.000135
Axin2	7.56e-09	-0.24035	0.277	0.348	0.000135
Epn2	7.66e-09	-0.2284	0.423	0.497	0.000137
H2-Q4	7.88e-09	-0.20928	0.235	0.308	0.000141
Slc25a4	7.91e-09	-0.17553	0.602	0.671	0.000142
Hddc2	7.92e-09	-0.16726	0.048	0.093	0.000142
Hivep2	8.05e-09	0.181147	0.207	0.146	0.000144
Rdm1	8.41e-09	-0.18014	0.193	0.263	0.000151
Tgs1	8.61e-09	-0.19477	0.159	0.225	0.000154
Rasgrp3	8.62e-09	-0.19357	0.59	0.654	0.000154
Cops6	8.69e-09	-0.19496	0.245	0.319	0.000156
Atp7a	8.76e-09	0.163887	0.145	0.093	0.000157
2310033P09Rik	8.8e-09	-0.18057	0.121	0.184	0.000158
Tmem205	8.86e-09	-0.19161	0.151	0.217	0.000159
Colca2	9.35e-09	-0.10149	0.02	0.054	0.000168
Rap1b	1.03e-08	0.193743	0.694	0.636	0.000184
Tma7	1.03e-08	-0.18502	0.546	0.606	0.000185
Uaca	1.06e-08	-0.21422	0.346	0.419	0.00019
Pphln1	1.09e-08	-0.13507	0.057	0.105	0.000195
Klf10	1.1e-08	0.205078	0.256	0.19	0.000197
Itga3	1.11e-08	0.112729	0.075	0.038	0.000198
Naxd	1.15e-08	-0.20658	0.164	0.228	0.000207
Plekhg1	1.17e-08	0.207124	0.405	0.329	0.000209
Glrx5	1.24e-08	-0.17786	0.167	0.236	0.000223
Noct	1.3e-08	0.207819	0.179	0.124	0.000233
Ncaph	1.31e-08	0.13751	0.087	0.048	0.000235
2210408F21Rik	1.31e-08	0.122821	0.069	0.034	0.000235
C130074G19Rik	1.35e-08	-0.24452	0.399	0.462	0.000242
Idnk	1.38e-08	-0.18403	0.143	0.207	0.000247
Psmg2	1.38e-08	-0.15914	0.097	0.154	0.000248
4833403J16Rik	1.4e-08	0.115557	0.093	0.052	0.00025
Tec	1.44e-08	-0.15148	0.032	0.071	0.000258
Mfsd4a	1.49e-08	0.150894	0.197	0.136	0.000266
Hbb-bs	1.49e-08	-1.95063	0.019	0.053	0.000267
Sigmar1	1.5e-08	-0.13818	0.062	0.111	0.000269
Hif1a	1.5e-08	-0.20188	0.247	0.32	0.000269
Ifi203	1.51e-08	-0.17889	0.054	0.1	0.000271
Hnrnpr	1.51e-08	-0.20993	0.28	0.355	0.000271
Mindy2	1.53e-08	0.22389	0.511	0.439	0.000274
Fis1	1.53e-08	-0.18203	0.456	0.535	0.000275
Psma5	1.54e-08	-0.19943	0.334	0.41	0.000276
Tmem256	1.57e-08	-0.20307	0.385	0.451	0.000281
Rapgef3	1.57e-08	0.175751	0.279	0.208	0.000281
Ctdspl2	1.57e-08	-0.20608	0.169	0.233	0.000282
Nop53	1.59e-08	0.22242	0.352	0.283	0.000284
Gstp1	1.62e-08	-0.10564	0.017	0.049	0.00029
Dpysl2	1.65e-08	-0.20315	0.285	0.36	0.000296
Med21	1.68e-08	-0.19156	0.256	0.331	0.000301
Pum3	1.71e-08	-0.14799	0.046	0.089	0.000306
Ywhaq	1.75e-08	-0.15947	0.782	0.822	0.000313
Pde7b	1.75e-08	0.151699	0.113	0.068	0.000314
Rad23b	1.76e-08	-0.19782	0.195	0.263	0.000315
Lsm5	1.77e-08	-0.1874	0.219	0.291	0.000316
Sik1	1.77e-08	0.205036	0.586	0.51	0.000318
Rassf8	1.78e-08	-0.14128	0.077	0.129	0.000319
Wwp1	1.8e-08	-0.19334	0.154	0.219	0.000322
Commd1	1.81e-08	-0.20123	0.349	0.422	0.000324
Ppp1r14b	1.82e-08	-0.15181	0.115	0.175	0.000326
Atrx	1.9e-08	-0.19782	0.605	0.671	0.00034
Rab11fip1	1.9e-08	0.210101	0.487	0.415	0.00034
Lxn	1.97e-08	-0.16081	0.087	0.14	0.000353
Glod4	2.01e-08	-0.17521	0.155	0.218	0.00036
Eef1b2	2.01e-08	0.171788	0.832	0.796	0.00036
Afdn	2.02e-08	-0.1739	0.678	0.733	0.000363
Mrpl58	2.09e-08	-0.17919	0.146	0.21	0.000375
Tm4sf1	2.09e-08	-0.22756	0.726	0.773	0.000375
Cramp1l	2.15e-08	0.185329	0.186	0.13	0.000385
Coa6	2.29e-08	-0.14524	0.081	0.134	0.00041
Cpe	2.29e-08	0.242427	0.263	0.2	0.00041
Cep350	2.3e-08	-0.21384	0.201	0.266	0.000412
Cebpzos	2.43e-08	-0.17701	0.139	0.2	0.000435
Pgp	2.43e-08	-0.17685	0.245	0.317	0.000436
Ddhd2	2.55e-08	-0.17652	0.096	0.15	0.000457
Phpt1	2.6e-08	-0.19507	0.142	0.202	0.000465
Ssr4	2.6e-08	-0.19611	0.407	0.475	0.000466
Wnk1	2.63e-08	0.180795	0.536	0.455	0.000471
Stub1	2.64e-08	-0.19093	0.331	0.405	0.000473
Tnfrsf21	2.66e-08	-0.11876	0.023	0.058	0.000476
Mrps36	2.68e-08	-0.16705	0.138	0.201	0.00048
Twf2	2.85e-08	-0.18101	0.205	0.275	0.00051
Ncoa7	2.86e-08	-0.17754	0.11	0.168	0.000512
Fam162a	2.87e-08	-0.16893	0.158	0.222	0.000515
Phf14	2.9e-08	-0.22647	0.256	0.326	0.00052
Nr2f6	2.92e-08	-0.16618	0.095	0.149	0.000522
Pdia4	2.96e-08	-0.18939	0.157	0.22	0.00053
Zfp706	2.96e-08	-0.20386	0.321	0.393	0.000531
Dop1a	3.05e-08	0.215165	0.314	0.248	0.000546
Reep3	3.1e-08	-0.17425	0.696	0.738	0.000555
Jup	3.18e-08	-0.21131	0.386	0.455	0.00057
Hectd1	3.24e-08	0.200094	0.568	0.505	0.000581
Mrpl57	3.25e-08	-0.17534	0.139	0.201	0.000582
Ate1	3.31e-08	-0.17026	0.196	0.265	0.000593
Dtd2	3.35e-08	-0.16137	0.061	0.107	0.0006
Mycbp2	3.36e-08	-0.20969	0.318	0.391	0.000602
Rplp2	3.36e-08	0.105546	0.977	0.972	0.000602
Nfe2l2	3.4e-08	-0.18993	0.35	0.423	0.000609
Polr2j	3.42e-08	-0.19227	0.311	0.382	0.000613
Polr2d	3.43e-08	-0.14791	0.095	0.149	0.000614
Rxylt1	3.47e-08	-0.17268	0.14	0.202	0.000622
Myef2	3.49e-08	-0.1959	0.114	0.17	0.000625
Sod2	3.53e-08	-0.17748	0.242	0.315	0.000633
Tnfsf12	3.57e-08	-0.19833	0.301	0.373	0.000639
Ifit1	3.58e-08	-0.27678	0.162	0.223	0.000642
Mrpl13	3.63e-08	-0.1678	0.142	0.202	0.000651
Rapgef1	3.65e-08	0.207051	0.231	0.172	0.000653
Isyna1	3.74e-08	-0.18246	0.537	0.597	0.00067
Usf3	3.75e-08	-0.17796	0.097	0.152	0.000672
Ggact	3.78e-08	-0.18687	0.109	0.164	0.000678
Trappc2l	3.8e-08	-0.18093	0.202	0.27	0.000681
Gm26812	3.8e-08	0.079255	0.03	0.01	0.000681
Galk1	3.91e-08	-0.14268	0.056	0.101	0.0007
Degs2	3.92e-08	-0.20869	0.472	0.535	0.000702
Cacna1e	3.94e-08	0.099869	0.052	0.023	0.000706
Nudt22	3.94e-08	-0.09227	0.019	0.051	0.000706
Mrps28	3.95e-08	-0.15949	0.096	0.149	0.000707
Sema6b	3.95e-08	0.142617	0.109	0.066	0.000708
Arhgap29	3.95e-08	-0.1789	0.745	0.77	0.000708
B4gat1	4.01e-08	-0.15377	0.095	0.149	0.000718
H3f3b	4.04e-08	0.101734	0.992	0.996	0.000724
Nck1	4.11e-08	-0.17225	0.351	0.422	0.000737
Cdc42bpa	4.12e-08	0.213221	0.301	0.235	0.000739
Enc1	4.16e-08	0.209336	0.366	0.294	0.000745
Sec11c	4.22e-08	-0.20431	0.306	0.375	0.000757
Nfu1	4.26e-08	-0.17848	0.146	0.207	0.000763
Tbxa2r	4.62e-08	-0.15054	0.036	0.073	0.000827
Micos13	4.71e-08	-0.17795	0.352	0.427	0.000844
Psip1	4.81e-08	-0.19071	0.154	0.216	0.000863
Cwc15	5.03e-08	-0.19512	0.474	0.541	0.000901
Psmd6	5.17e-08	-0.17722	0.212	0.281	0.000927
Shkbp1	5.35e-08	-0.11473	0.031	0.067	0.000959
Med13l	5.42e-08	0.204364	0.269	0.207	0.000971
Scand1	5.44e-08	-0.19765	0.26	0.327	0.000975
Tap2	5.47e-08	-0.19129	0.213	0.28	0.00098
Vps29	5.57e-08	-0.17932	0.361	0.436	0.000998
Sars	5.62e-08	-0.17602	0.257	0.326	0.001007
Mxd1	5.66e-08	0.132822	0.099	0.058	0.001014
Tm2d3	5.68e-08	-0.19545	0.179	0.243	0.001019
Ddx18	5.77e-08	-0.19685	0.216	0.284	0.001034
Grcc10	5.81e-08	-0.16479	0.625	0.677	0.001041
Lpar4	5.95e-08	-0.12995	0.04	0.079	0.001066
Ddost	6.04e-08	-0.19161	0.244	0.311	0.001083
Selenos	6.19e-08	-0.21548	0.171	0.233	0.00111
Dctpp1	6.21e-08	-0.13955	0.049	0.09	0.001112
2310022B05Rik	6.26e-08	-0.20381	0.166	0.226	0.001121
Mrpl36	6.27e-08	-0.1867	0.155	0.217	0.001124
Lncpint	6.44e-08	0.186553	0.201	0.143	0.001153
Lrch1	6.47e-08	0.19779	0.271	0.209	0.001159
Aamdc	6.5e-08	-0.17089	0.178	0.243	0.001165
Ndufv2	6.51e-08	-0.19648	0.33	0.4	0.001166
Cdkn2c	6.53e-08	-0.10572	0.03	0.067	0.001171
Slc25a40	6.64e-08	-0.12623	0.041	0.081	0.00119
Sdhb	6.77e-08	-0.17454	0.293	0.362	0.001213
Gm5617	6.81e-08	-0.12942	0.047	0.089	0.00122
Ccdc102a	6.81e-08	-0.12556	0.044	0.085	0.001221
Dpm1	6.98e-08	-0.1733	0.335	0.402	0.001251
Sp110	7.04e-08	-0.14502	0.05	0.092	0.001262
Ctcf	7.35e-08	-0.18166	0.415	0.48	0.001317
Ercc5	7.39e-08	0.169688	0.195	0.139	0.001325
Slc16a6	7.69e-08	0.103115	0.04	0.016	0.001378
Cers4	7.8e-08	-0.20482	0.212	0.279	0.001398
Lrp6	7.86e-08	-0.16402	0.236	0.306	0.001409
Pycr2	7.92e-08	-0.15654	0.128	0.187	0.001419
Fdx1	7.94e-08	-0.17102	0.177	0.241	0.001423
Slc25a1	7.96e-08	-0.14189	0.082	0.133	0.001427
Tecrl	8.28e-08	0.135087	0.096	0.056	0.001485
Apopt1	8.3e-08	-0.1895	0.213	0.279	0.001487
Rpap3	8.33e-08	-0.17256	0.086	0.136	0.001493
Ebna1bp2	8.43e-08	-0.19308	0.2	0.263	0.00151
Pgk1	8.79e-08	-0.17358	0.189	0.254	0.001575
Acaa2	8.92e-08	-0.17584	0.178	0.242	0.001598
Adi1	9.31e-08	-0.11776	0.025	0.057	0.001668
Ndufa3	9.47e-08	-0.16898	0.558	0.619	0.001698
Zfp24	9.58e-08	-0.14797	0.139	0.2	0.001716
Mndal	9.64e-08	-0.21674	0.05	0.091	0.001727
1810026B05Rik	9.65e-08	-0.17774	0.399	0.47	0.001729
Acads	9.67e-08	-0.14721	0.084	0.134	0.001733
Timm23	9.78e-08	-0.17275	0.212	0.281	0.001753
Psmd11	9.86e-08	-0.19183	0.349	0.418	0.001767
Lmntd1	9.94e-08	-0.14826	0.061	0.105	0.001781
Ndufs6	9.95e-08	-0.16402	0.409	0.485	0.001782
Smarcd1	1e-07	-0.16884	0.179	0.244	0.001799
Rpl34	1.01e-07	0.089715	0.996	0.995	0.001811
Plscr3	1.02e-07	-0.14353	0.062	0.107	0.001831
0610010K14Rik	1.04e-07	-0.2049	0.3	0.368	0.001857
Atad2b	1.08e-07	-0.18136	0.12	0.176	0.001941
Irgm2	1.09e-07	-0.1341	0.062	0.108	0.001945
Snx6	1.09e-07	-0.18858	0.33	0.397	0.001952
Pnkp	1.1e-07	-0.14448	0.065	0.111	0.001973
Cbx5	1.11e-07	-0.18672	0.259	0.327	0.001981
Trp53inp2	1.13e-07	0.14035	0.136	0.089	0.002019
Chst15	1.13e-07	0.137456	0.092	0.054	0.002031
Lpl	1.14e-07	0.07774	0.018	0.004	0.00204
Dnm2	1.15e-07	-0.19259	0.406	0.478	0.002058
Polr2g	1.2e-07	-0.1954	0.281	0.348	0.002147
Taf10	1.2e-07	-0.19143	0.391	0.456	0.002149
Slc24a5	1.2e-07	-0.1319	0.049	0.09	0.002158
2210016L21Rik	1.23e-07	-0.16967	0.182	0.247	0.002212
Aprt	1.26e-07	-0.15477	0.099	0.151	0.002252
Ndufb5	1.27e-07	-0.16725	0.455	0.52	0.002274
Fra10ac1	1.28e-07	-0.14259	0.091	0.142	0.002301
Schip1	1.29e-07	0.133815	0.079	0.044	0.002304
Ufc1	1.3e-07	-0.18057	0.256	0.326	0.002326
Frmd6	1.31e-07	-0.12834	0.034	0.07	0.002352
Zzz3	1.33e-07	-0.19841	0.182	0.241	0.002384
Naca	1.35e-07	-0.12391	0.902	0.926	0.002424
Crk	1.36e-07	0.191293	0.391	0.322	0.00243
Ipo11	1.38e-07	-0.14944	0.097	0.15	0.002465
Rhod	1.38e-07	-0.10746	0.025	0.058	0.002478
Pex3	1.39e-07	-0.1614	0.132	0.189	0.002483
Kansl3	1.4e-07	0.157383	0.221	0.162	0.002506
Msrb1	1.41e-07	-0.13209	0.074	0.122	0.002521
Smarca2	1.42e-07	0.196598	0.59	0.525	0.002537
Pradc1	1.42e-07	-0.12941	0.048	0.088	0.002539
Irgm1	1.44e-07	-0.18258	0.095	0.145	0.00258
Hmgxb4	1.45e-07	-0.16468	0.115	0.171	0.002597
Fbxo22	1.45e-07	-0.16865	0.147	0.206	0.002601
Glo1	1.46e-07	-0.18477	0.238	0.304	0.002615
Ccnd3	1.5e-07	0.187749	0.412	0.347	0.002682
Ndufaf4	1.51e-07	-0.1486	0.107	0.162	0.002697
Smc5	1.53e-07	-0.1587	0.068	0.112	0.002747
Tjp1	1.54e-07	-0.15029	0.849	0.861	0.002752
Ssbp1	1.54e-07	-0.1532	0.197	0.262	0.002756
Cdc42	1.54e-07	-0.14527	0.853	0.874	0.002762
Aarsd1	1.6e-07	-0.18113	0.154	0.212	0.002863
Lzts2	1.6e-07	-0.17072	0.091	0.14	0.002865
Comtd1	1.64e-07	-0.08284	0.018	0.047	0.002935
Nr1d2	1.64e-07	0.161635	0.137	0.09	0.002936
Cfap20	1.66e-07	-0.17807	0.148	0.206	0.002976
Psmd4	1.66e-07	-0.17704	0.437	0.511	0.002982
Usp34	1.75e-07	-0.17139	0.391	0.464	0.003139
Mfsd2a	1.76e-07	-0.17781	0.679	0.741	0.003154
Snhg8	1.76e-07	0.188264	0.428	0.354	0.003155
Ccng2	1.81e-07	0.158654	0.172	0.12	0.003252
Stat1	1.83e-07	-0.21184	0.203	0.265	0.003273
Rif1	1.84e-07	-0.21603	0.148	0.203	0.003291
Anxa7	1.87e-07	0.170249	0.414	0.345	0.003348
Impdh1	1.87e-07	-0.18864	0.337	0.403	0.00336
3830406C13Rik	1.88e-07	-0.14335	0.1	0.152	0.003378
Cdc42ep4	1.89e-07	0.180884	0.31	0.246	0.003381
Hspa1b	2e-07	0.289067	0.568	0.51	0.003591
Cpne8	2.01e-07	-0.17335	0.218	0.285	0.0036
Ramp3	2.03e-07	-0.14653	0.067	0.112	0.003639
Snrpd3	2.03e-07	-0.17002	0.298	0.369	0.003645
Ism1	2.11e-07	0.18653	0.167	0.118	0.003784
Isca1	2.13e-07	-0.13938	0.081	0.129	0.003824
Smap2	2.14e-07	-0.14785	0.097	0.149	0.003839
Heca	2.22e-07	0.165769	0.225	0.167	0.003976
Tnk2	2.23e-07	-0.12298	0.056	0.098	0.003992
Ankrd46	2.23e-07	0.155065	0.231	0.172	0.003995
Eid1	2.24e-07	-0.18779	0.367	0.434	0.004014
Shisa5	2.29e-07	-0.18983	0.279	0.346	0.004105
Lyrm1	2.31e-07	0.148938	0.15	0.101	0.004131
Anks1	2.33e-07	0.195805	0.38	0.312	0.004175
Kcnj2	2.34e-07	-0.12194	0.024	0.055	0.004196
Snrnp27	2.37e-07	-0.17389	0.4	0.473	0.004248
Krt222	2.38e-07	-0.11028	0.023	0.054	0.00426
Mrps5	2.44e-07	-0.1745	0.266	0.335	0.004375
Zfp442	2.46e-07	-0.11099	0.023	0.054	0.004406
Eif5b	2.52e-07	-0.24204	0.418	0.479	0.004516
Slc1a2	2.56e-07	0.055005	0.017	0.004	0.004584
Pla2g6	2.6e-07	0.124377	0.067	0.036	0.004666
D030056L22Rik	2.64e-07	-0.1502	0.082	0.13	0.004722
Them6	2.73e-07	-0.11054	0.033	0.067	0.00489
Psmc2	2.8e-07	-0.17612	0.269	0.333	0.005014
Rhpn2	2.82e-07	-0.09943	0.014	0.041	0.005052
Timm10	2.84e-07	-0.12466	0.047	0.086	0.005096
Dusp5	2.89e-07	0.044375	0.019	0.005	0.00518
Hdac7	2.89e-07	-0.18702	0.308	0.374	0.005183
Rer1	2.91e-07	-0.1755	0.367	0.431	0.005208
Spryd7	2.92e-07	-0.13046	0.045	0.083	0.005226
Kctd2	2.93e-07	-0.17136	0.131	0.186	0.005254
Pa2g4	3.03e-07	-0.16221	0.232	0.3	0.005424
Card19	3.2e-07	-0.17764	0.288	0.355	0.005743
Tmed9	3.23e-07	-0.1691	0.556	0.614	0.005791
Nudcd2	3.28e-07	-0.14127	0.09	0.14	0.005875
Ppp1r10	3.28e-07	0.197634	0.327	0.267	0.005878
Vangl2	3.32e-07	-0.11841	0.037	0.073	0.005949
Kdelr2	3.36e-07	-0.16997	0.223	0.287	0.006028
Mrpl34	3.37e-07	-0.16478	0.194	0.257	0.006033
Bin3	3.44e-07	-0.16084	0.089	0.137	0.006157
Tsn	3.46e-07	-0.1679	0.381	0.448	0.006209
Gnb2	3.49e-07	-0.15796	0.708	0.743	0.006259
Ntpcr	3.54e-07	-0.10614	0.028	0.06	0.006343
Git2	3.56e-07	0.210044	0.483	0.417	0.006385
Tsen34	3.6e-07	-0.18265	0.211	0.273	0.00645
Ptbp1	3.6e-07	-0.17507	0.249	0.314	0.006455
B230219D22Rik	3.61e-07	-0.15638	0.657	0.702	0.006466
Capza1	3.65e-07	-0.19142	0.212	0.272	0.006548
Tceal1	3.68e-07	-0.13167	0.048	0.086	0.006603
Cdh5	3.76e-07	-0.13244	0.85	0.874	0.006732
Fam136a	3.77e-07	-0.14943	0.058	0.099	0.00676
Camk2g	3.8e-07	-0.12969	0.061	0.103	0.006811
Golph3l	3.82e-07	-0.13746	0.088	0.136	0.006844
Tcf3	3.83e-07	-0.16027	0.147	0.204	0.006863
Wdr76	3.86e-07	-0.12081	0.025	0.055	0.006913
Me2	3.87e-07	-0.11535	0.029	0.062	0.006937
Spcs2	3.88e-07	-0.16711	0.528	0.589	0.006947
Ube2q2	3.91e-07	-0.1396	0.077	0.123	0.007005
Tjp2	3.92e-07	-0.17359	0.222	0.285	0.007026
Tlk1	3.93e-07	-0.18001	0.217	0.278	0.007037
Rtf2	3.96e-07	-0.18069	0.189	0.247	0.007101
Colgalt2	4.04e-07	-0.12954	0.069	0.113	0.007244
Dnmt1	4.21e-07	-0.16208	0.095	0.144	0.007544
Jarid2	4.32e-07	-0.18074	0.128	0.182	0.007744
Tor2a	4.34e-07	-0.1365	0.075	0.12	0.007773
Nutf2-ps1	4.36e-07	-0.08262	0.018	0.045	0.007811
Arhgef7	4.39e-07	0.167109	0.168	0.119	0.007863
Bbc3	4.4e-07	0.124551	0.119	0.077	0.007888
Amdhd2	4.43e-07	-0.12701	0.034	0.068	0.007943
Snhg20	4.51e-07	-0.14168	0.061	0.102	0.008081
Tcim	4.53e-07	0.173198	0.31	0.244	0.008119
Gm47123	4.53e-07	0.057248	0.022	0.006	0.008121
Mrpl35	4.55e-07	-0.1573	0.118	0.171	0.008162
Lrrc8c	4.56e-07	0.171792	0.468	0.402	0.008167
Elovl1	4.62e-07	-0.15707	0.109	0.159	0.008274
H2afv	4.63e-07	-0.16743	0.533	0.593	0.00829
Mterf1a	4.81e-07	-0.08961	0.011	0.036	0.008621
Tex261	4.82e-07	-0.17266	0.23	0.294	0.008646
Cyc1	4.85e-07	-0.15945	0.247	0.31	0.008687
Smc3	4.92e-07	-0.16136	0.358	0.432	0.008818
A430005L14Rik	4.96e-07	-0.1392	0.092	0.141	0.008895
Dhrs1	4.97e-07	-0.14806	0.084	0.13	0.008901
Ssr1	5.03e-07	-0.20481	0.292	0.354	0.009006
Hdac2	5.04e-07	-0.13868	0.109	0.161	0.009038
Lsmem1	5.06e-07	0.048769	0.015	0.003	0.009071
Scamp3	5.14e-07	-0.13822	0.105	0.156	0.009214
Stag1	5.16e-07	-0.17997	0.304	0.369	0.009244
Smc2	5.21e-07	-0.16546	0.058	0.099	0.00934
Bend5	5.22e-07	-0.18639	0.122	0.174	0.009351
Elmo1	5.22e-07	0.131487	0.188	0.135	0.009354
Usp1	5.25e-07	-0.15162	0.152	0.211	0.009403
Bud23	5.27e-07	-0.13451	0.085	0.131	0.00944
Uchl3	5.28e-07	-0.12569	0.063	0.105	0.009454
Commd3	5.39e-07	-0.17819	0.232	0.293	0.009655
Atp6v0b	5.48e-07	-0.16293	0.549	0.602	0.009825
Tcerg1	5.54e-07	-0.16744	0.14	0.197	0.009928
Dhx15	5.59e-07	-0.1732	0.296	0.357	0.010026
Ing2	5.62e-07	0.175993	0.248	0.191	0.010069
Lamtor1	5.74e-07	-0.14706	0.242	0.307	0.01028
Gstm5	5.76e-07	-0.14085	0.115	0.167	0.010313
Tmem37	5.9e-07	-0.10485	0.022	0.051	0.010578
Fam92a	5.93e-07	-0.14817	0.118	0.171	0.010629
BC031181	5.97e-07	-0.16234	0.442	0.508	0.010691
Bcl9	6.01e-07	-0.10161	0.017	0.044	0.010763
Mtap	6.03e-07	-0.13805	0.087	0.134	0.010808
Btg3	6.05e-07	-0.20669	0.454	0.514	0.010836
Atxn7l3b	6.17e-07	-0.16853	0.602	0.652	0.011065
Zmym4	6.3e-07	-0.16707	0.152	0.209	0.011285
Id3	6.34e-07	0.14635	0.98	0.974	0.011363
Adrm1	6.55e-07	-0.14702	0.16	0.219	0.011735
Cnn3	6.61e-07	0.184306	0.36	0.294	0.011843
Pcbp2	6.65e-07	0.138903	0.777	0.73	0.011911
Rcbtb2	6.65e-07	-0.10794	0.042	0.079	0.011919
Anp32e	6.77e-07	-0.17385	0.204	0.263	0.012137
Parp14	6.79e-07	-0.19701	0.154	0.209	0.012173
Smim11	6.87e-07	-0.17489	0.386	0.44	0.012311
Dclre1b	6.87e-07	0.085556	0.044	0.02	0.012312
Gm16046	6.9e-07	-0.16818	0.108	0.158	0.012361
Gm5	6.94e-07	0.113121	0.063	0.034	0.012441
Brd7	6.95e-07	-0.1865	0.243	0.305	0.012445
Yipf1	7.03e-07	-0.17597	0.172	0.228	0.012604
Cd200	7.1e-07	-0.18294	0.674	0.718	0.012729
AC149090.1	7.27e-07	-0.18997	0.391	0.456	0.013036
Wdr70	7.36e-07	-0.16424	0.149	0.204	0.013187
Pllp	7.43e-07	-0.16352	0.524	0.578	0.013311
Pfdn2	7.44e-07	-0.17706	0.327	0.389	0.013325
Tmem208	7.57e-07	-0.18129	0.166	0.221	0.013562
Hmgn1	7.63e-07	-0.17186	0.459	0.519	0.013666
Trak1	7.7e-07	0.152278	0.176	0.127	0.013795
Rbbp4	7.78e-07	-0.18483	0.34	0.406	0.013948
Cnot4	7.83e-07	-0.16288	0.21	0.272	0.014024
St6galnac2	7.86e-07	0.19522	0.456	0.394	0.014083
Golim4	7.86e-07	-0.16613	0.641	0.677	0.014087
Rrbp1	7.86e-07	-0.13508	0.586	0.651	0.014091
Eea1	7.87e-07	-0.17944	0.197	0.257	0.014098
Prkaca	7.9e-07	-0.13586	0.085	0.13	0.014149
Cox20	7.93e-07	-0.14658	0.183	0.244	0.014209
Fam71a	8e-07	0.107617	0.068	0.038	0.01433
Fth1	8.11e-07	-0.08775	0.98	0.989	0.014528
Ube2a	8.25e-07	-0.14924	0.143	0.197	0.014776
Sh3glb1	8.26e-07	-0.13195	0.878	0.893	0.014799
1700084E18Rik	8.42e-07	0.07978	0.038	0.016	0.015081
Slc30a1	8.42e-07	0.141469	0.739	0.682	0.015097
Arl2	8.54e-07	-0.1273	0.123	0.178	0.015296
Ifngr1	8.56e-07	-0.16545	0.167	0.224	0.015335
5930430L01Rik	8.57e-07	-0.0926	0.015	0.041	0.015359
Serpinb1a	8.57e-07	-0.07251	0.007	0.028	0.015361
Fxr1	8.58e-07	-0.14802	0.476	0.543	0.015374
mt-Nd4	8.65e-07	0.092463	0.991	0.984	0.015508
Pdcd5	8.66e-07	-0.16573	0.465	0.53	0.015515
Fam32a	8.71e-07	-0.18837	0.325	0.387	0.015607
Oasl2	8.81e-07	-0.17888	0.126	0.178	0.015796
Mrps18a	8.98e-07	-0.16402	0.128	0.18	0.016094
Crim1	9.01e-07	0.162152	0.438	0.368	0.016139
Gm29107	9.18e-07	0.081676	0.056	0.029	0.016452
Slc25a11	9.2e-07	-0.15047	0.134	0.187	0.016488
Vps28	9.33e-07	-0.15661	0.349	0.415	0.016715
E230001N04Rik	9.33e-07	0.069315	0.029	0.01	0.016728
Coa3	9.37e-07	-0.16197	0.411	0.481	0.016789
Fam102a	9.4e-07	-0.07483	0.011	0.035	0.016841
Stmn2	9.4e-07	-0.21277	0.033	0.065	0.01685
Ddx60	9.44e-07	-0.12023	0.037	0.071	0.016913
Uqcrc1	9.45e-07	-0.17797	0.258	0.316	0.01694
Hp1bp3	9.51e-07	-0.20418	0.399	0.458	0.017045
Synrg	9.52e-07	-0.16692	0.221	0.283	0.017056
Pstk	9.58e-07	-0.12582	0.056	0.095	0.017159
Bahcc1	9.58e-07	-0.11976	0.03	0.062	0.01716
Rock1	9.61e-07	-0.18762	0.595	0.642	0.017219
Timm17a	9.64e-07	-0.19213	0.294	0.353	0.017276
Gabarapl2	9.76e-07	-0.15509	0.75	0.776	0.017489
Psenen	9.78e-07	-0.17246	0.433	0.5	0.017532
Malsu1	9.88e-07	-0.16258	0.145	0.2	0.017709
Chmp6	9.93e-07	-0.14822	0.143	0.199	0.017791
Ciapin1	9.97e-07	-0.15609	0.096	0.143	0.01787
Dtd1	9.97e-07	-0.15483	0.157	0.212	0.017874
Ddx39	9.97e-07	-0.15206	0.09	0.136	0.017874
Ro60	9.98e-07	-0.15428	0.251	0.314	0.017887
Mpc1	1.01e-06	-0.18621	0.387	0.442	0.01802
Papss1	1.04e-06	-0.16223	0.142	0.195	0.018652
Dpm2	1.04e-06	-0.15896	0.122	0.173	0.018667
Mrpl15	1.04e-06	-0.17233	0.193	0.251	0.018675
Sgk3	1.06e-06	-0.14216	0.105	0.154	0.018997
Tbcb	1.07e-06	-0.17541	0.346	0.406	0.019155
Fam129b	1.07e-06	-0.1631	0.178	0.234	0.019178
Gm15614	1.07e-06	0.052629	0.021	0.006	0.019197
Lgalsl	1.08e-06	0.169891	0.299	0.24	0.01935
Gdpd5	1.09e-06	0.142947	0.12	0.08	0.019575
Atp6v1d	1.12e-06	-0.15063	0.229	0.292	0.020071
Erg28	1.15e-06	-0.13632	0.081	0.125	0.020593
Ptpmt1	1.16e-06	-0.1558	0.13	0.181	0.020768
Mrpl48	1.16e-06	-0.15359	0.189	0.249	0.020832
Magix	1.16e-06	-0.11811	0.042	0.078	0.020861
Rad23a	1.17e-06	-0.16301	0.188	0.244	0.020941
Tra2b	1.17e-06	0.164687	0.632	0.567	0.020973
S100a1	1.17e-06	-0.18422	0.346	0.41	0.021002
Fam210b	1.21e-06	-0.13027	0.073	0.117	0.021763
Bod1	1.24e-06	-0.16454	0.171	0.228	0.022136
Mrpl11	1.24e-06	-0.13968	0.175	0.234	0.022257
Cracr2b	1.25e-06	0.176401	0.514	0.457	0.022353
Ccni	1.26e-06	0.164185	0.355	0.292	0.022585
Fam189a2	1.26e-06	-0.10247	0.034	0.066	0.022625
Emc7	1.27e-06	-0.15602	0.477	0.535	0.022796
Anxa11	1.3e-06	-0.16576	0.163	0.217	0.023346
Eif6	1.31e-06	-0.16511	0.242	0.302	0.023431
Itpripl2	1.31e-06	0.173899	0.34	0.28	0.023436
Rbis	1.31e-06	-0.17776	0.307	0.372	0.023564
Btf3	1.33e-06	-0.12693	0.879	0.905	0.023897
Kif2a	1.34e-06	-0.17125	0.252	0.315	0.02404
Esyt2	1.34e-06	-0.14821	0.751	0.773	0.024065
Thbd	1.35e-06	-0.173	0.336	0.403	0.024141
Hdac5	1.36e-06	-0.13324	0.093	0.139	0.024369
Rpp21	1.37e-06	-0.16359	0.193	0.251	0.024621
Tln1	1.38e-06	-0.16598	0.464	0.519	0.024765
Rpl10a	1.4e-06	0.115065	0.897	0.879	0.025169
Nhp2	1.4e-06	-0.12007	0.08	0.124	0.025172
Rab5if	1.41e-06	-0.13854	0.236	0.3	0.0252
Gemin2	1.41e-06	-0.12701	0.053	0.091	0.025307
Ptp4a2	1.41e-06	0.16434	0.559	0.501	0.025336
2023-09-01	1.42e-06	-0.09992	0.023	0.052	0.025435
Commd5	1.42e-06	-0.07129	0.009	0.03	0.025444
Trmt1	1.43e-06	-0.13254	0.058	0.096	0.025556
Mrpl27	1.45e-06	-0.13948	0.174	0.231	0.025897
Crybg3	1.45e-06	-0.16088	0.507	0.569	0.025983
Dip2b	1.47e-06	-0.18544	0.335	0.395	0.026287
Rras	1.52e-06	-0.14904	0.642	0.688	0.027273
Scaf11	1.54e-06	-0.17207	0.295	0.357	0.027571
Arpc5	1.54e-06	-0.15361	0.462	0.52	0.027638
1190007I07Rik	1.56e-06	-0.09814	0.032	0.064	0.027978
Bola3	1.57e-06	-0.17664	0.235	0.296	0.028091
Mkrn1	1.57e-06	0.220642	0.288	0.231	0.028188
Gabarap	1.58e-06	-0.13054	0.73	0.78	0.028394
Eloc	1.61e-06	-0.1573	0.454	0.503	0.028865
Lgals3bp	1.61e-06	-0.16434	0.15	0.203	0.028912
Ubr1	1.65e-06	-0.12109	0.134	0.188	0.029515
Kpna4	1.65e-06	-0.16014	0.276	0.339	0.02955
Slc16a1	1.66e-06	-0.31949	0.521	0.562	0.029706
Hypk	1.72e-06	-0.17429	0.352	0.414	0.030783
Cycs	1.73e-06	-0.16319	0.365	0.428	0.031016
Pcbd2	1.79e-06	-0.16503	0.213	0.272	0.032031
Apip	1.79e-06	-0.16113	0.101	0.146	0.032134
Slc39a1	1.84e-06	-0.14362	0.108	0.156	0.032917
Cfap97	1.85e-06	-0.15599	0.097	0.142	0.033084
Capns1	1.88e-06	-0.16781	0.589	0.634	0.033678
Wasl	1.92e-06	-0.1717	0.294	0.357	0.034392
Hibadh	1.95e-06	-0.1451	0.139	0.191	0.034886
Zfp36l2	1.95e-06	0.224487	0.284	0.229	0.034998
Banf1	1.96e-06	-0.17436	0.229	0.288	0.035123
Timm22	1.99e-06	-0.14006	0.099	0.145	0.035702
Alyref	2e-06	-0.17408	0.243	0.299	0.035851
Cuedc2	2.03e-06	-0.17199	0.293	0.353	0.036432
Akr1c14	2.05e-06	-0.16091	0.144	0.196	0.03672
Mdp1	2.06e-06	-0.14768	0.166	0.22	0.036828
Txndc15	2.06e-06	-0.12818	0.186	0.245	0.036859
Srek1	2.08e-06	-0.16443	0.206	0.262	0.037194
Bcap29	2.08e-06	-0.14775	0.155	0.21	0.037324
Rnf19a	2.09e-06	0.160896	0.281	0.226	0.037505
Arhgap10	2.12e-06	-0.14886	0.074	0.114	0.038001
Psmd13	2.12e-06	-0.15317	0.258	0.32	0.038028
Gm29237	2.12e-06	0.04798	0.021	0.006	0.038073
Wscd1	2.14e-06	-0.10518	0.037	0.07	0.038268
Cib1	2.18e-06	-0.14195	0.146	0.199	0.039028
Dync1i2	2.19e-06	-0.10481	0.766	0.798	0.039208
Slc16a2	2.2e-06	-0.16521	0.511	0.578	0.03946
Zc3h15	2.21e-06	-0.1836	0.366	0.426	0.039671
Aen	2.23e-06	-0.11139	0.045	0.08	0.039918
Tab2	2.26e-06	0.173226	0.346	0.287	0.040448
Mapk3	2.27e-06	-0.18072	0.456	0.512	0.040595
Tecr	2.3e-06	-0.17963	0.335	0.398	0.041211
Tmem223	2.31e-06	-0.17256	0.232	0.288	0.041457
Fam173a	2.32e-06	-0.15602	0.11	0.157	0.041662
Srm	2.35e-06	-0.10521	0.032	0.062	0.042052
Sra1	2.4e-06	-0.14823	0.174	0.229	0.04294
Siva1	2.42e-06	-0.11927	0.08	0.123	0.04332
Edn3	2.44e-06	-0.16014	0.135	0.187	0.043676
Ube2q1	2.45e-06	-0.18011	0.221	0.274	0.043889
Smc1a	2.47e-06	-0.17569	0.424	0.479	0.04426
Ppcs	2.5e-06	-0.1111	0.032	0.063	0.044816
Cd151	2.5e-06	-0.15743	0.501	0.56	0.044837
Tsfm	2.51e-06	-0.1189	0.072	0.113	0.045023
Csde1	2.51e-06	0.167159	0.622	0.563	0.045063
Comt	2.52e-06	-0.15548	0.192	0.249	0.045184
2310009A05Rik	2.53e-06	-0.16047	0.132	0.182	0.045267
Prkd3	2.55e-06	0.175576	0.344	0.287	0.045721
Med9	2.56e-06	-0.1405	0.123	0.173	0.045828
Zfp36l1	2.57e-06	-0.14229	0.858	0.868	0.046034
C1qbp	2.66e-06	-0.1321	0.135	0.187	0.047685
Clic5	2.66e-06	-0.14215	0.753	0.79	0.047752
Eif3f	2.66e-06	0.122333	0.801	0.759	0.047752
Flt4	2.68e-06	0.15455	0.294	0.238	0.048038
Rtf1	2.74e-06	-0.18669	0.42	0.483	0.049051
Psmd12	2.74e-06	-0.15755	0.313	0.372	0.049112
Cbfa2t3	2.77e-06	0.183706	0.437	0.376	0.049585
Oard1	2.78e-06	-0.14773	0.121	0.17	0.04975
Ctnnbip1	2.79e-06	-0.16552	0.411	0.469	0.049954
Cds2	2.83e-06	0.175974	0.277	0.222	0.050697
G3bp2	2.84e-06	-0.14887	0.324	0.388	0.050887
Hmgn5	2.87e-06	0.190393	0.209	0.16	0.051368
Cox14	2.87e-06	-0.16097	0.311	0.37	0.05138
Higd1a	2.89e-06	-0.13674	0.393	0.458	0.051852
Cyb5r1	2.9e-06	-0.11863	0.081	0.124	0.05188
Znrf3	2.9e-06	-0.12439	0.057	0.095	0.052002
Ilf3	2.95e-06	-0.13756	0.079	0.12	0.052839
Ralgds	2.96e-06	-0.08742	0.037	0.069	0.053126
Eef2kmt	2.97e-06	-0.11229	0.045	0.08	0.053193
Gmnn	3e-06	-0.13412	0.061	0.099	0.053808
Thsd1	3e-06	-0.16521	0.316	0.379	0.053819
Pdap1	3.01e-06	-0.18258	0.508	0.558	0.053923
Bzw2	3.04e-06	-0.12223	0.036	0.067	0.054431
Ebp	3.06e-06	-0.1516	0.171	0.224	0.054918
S100a10	3.1e-06	-0.13364	0.049	0.084	0.055628
Hspb8	3.14e-06	0.169202	0.202	0.152	0.056202
Hspd1	3.16e-06	-0.15418	0.319	0.379	0.056711
Mrpl14	3.21e-06	-0.16885	0.206	0.262	0.057533
Znrd2	3.22e-06	-0.11378	0.054	0.091	0.057658
Msl3	3.22e-06	-0.12348	0.107	0.155	0.057732
Mafa	3.26e-06	0.037508	0.015	0.003	0.058345
Zbtb38	3.36e-06	0.156694	0.409	0.345	0.060214
Bcas2	3.38e-06	-0.1763	0.313	0.372	0.060597
Usp16	3.38e-06	-0.15318	0.148	0.2	0.060614
Cpox	3.42e-06	-0.10313	0.052	0.088	0.061219
Cacybp	3.46e-06	-0.18372	0.309	0.366	0.06196
2610300M13Rik	3.47e-06	-0.06894	0.009	0.029	0.062097
Cpne2	3.51e-06	-0.12696	0.113	0.161	0.062814
Marf1	3.55e-06	-0.18421	0.182	0.232	0.063647
Hba-a1	3.59e-06	-1.26437	0.003	0.018	0.064267
Ppa1	3.62e-06	-0.13254	0.073	0.113	0.064841
Idh2	3.68e-06	-0.12143	0.068	0.108	0.066006
Tcf7	3.69e-06	-0.16487	0.237	0.294	0.066104
Psmc5	3.71e-06	-0.17848	0.333	0.383	0.066485
Acap2	3.84e-06	-0.15952	0.181	0.236	0.06873
Mrpl49	3.9e-06	-0.13144	0.085	0.127	0.069837
Gm17501	3.91e-06	0.080398	0.075	0.044	0.070056
Dnajb14	3.92e-06	-0.15128	0.131	0.18	0.070227
Eprs	3.93e-06	-0.15558	0.238	0.298	0.070478
Abca1	3.93e-06	0.130422	0.147	0.104	0.070508
Inpp1	3.95e-06	0.165109	0.249	0.197	0.070803
Tspan3	4.01e-06	-0.16448	0.191	0.245	0.071853
Atxn3	4.02e-06	0.128959	0.159	0.114	0.072092
Hist1h2bc	4.03e-06	-0.20707	0.354	0.418	0.072166
Abhd6	4.04e-06	-0.11996	0.07	0.11	0.072312
Selenok	4.05e-06	-0.10236	0.873	0.896	0.072601
Cbx6	4.08e-06	-0.12884	0.09	0.133	0.073185
Slc25a30	4.09e-06	0.138975	0.119	0.08	0.073353
Mrps17	4.12e-06	-0.1563	0.188	0.241	0.073773
Enpp5	4.2e-06	-0.10543	0.054	0.091	0.075304
Tmem160	4.23e-06	-0.16444	0.303	0.365	0.07586
Glud1	4.26e-06	-0.1598	0.33	0.39	0.076374
Fam98b	4.28e-06	-0.13565	0.117	0.165	0.076696
Nrd1	4.29e-06	-0.17727	0.382	0.433	0.076893
mt-Atp8	4.36e-06	0.19308	0.721	0.689	0.078049
Pwwp3a	4.36e-06	-0.13919	0.214	0.274	0.078083
Nudt5	4.47e-06	-0.13241	0.071	0.11	0.080024
Dhx29	4.48e-06	-0.10758	0.056	0.093	0.080357
Smim26	4.49e-06	-0.14043	0.216	0.273	0.08053
Col4a3bp	4.54e-06	-0.14059	0.726	0.75	0.081424
Ebpl	4.55e-06	-0.11466	0.065	0.104	0.081478
Vkorc1	4.55e-06	-0.15448	0.208	0.265	0.081546
Lsm3	4.7e-06	-0.14178	0.095	0.139	0.084227
Ppa2	4.7e-06	-0.12	0.07	0.11	0.084292
Laptm4a	4.71e-06	-0.10577	0.86	0.881	0.084335
Prps1l3	4.75e-06	-0.09219	0.036	0.066	0.085092
Dusp7	4.8e-06	-0.17153	0.273	0.333	0.086014
Adh5	4.91e-06	-0.16957	0.315	0.374	0.087984
Prdx3	4.96e-06	-0.14265	0.104	0.149	0.088931
Rnf130	5e-06	-0.15389	0.311	0.37	0.089547
Notumos	5.01e-06	-0.09019	0.023	0.05	0.089746
Exosc9	5.06e-06	-0.12318	0.075	0.115	0.09065
Fchsd2	5.07e-06	-0.10031	0.044	0.077	0.090776
Ramac	5.1e-06	-0.14652	0.276	0.337	0.091443
Rflnb	5.15e-06	-0.22302	0.449	0.487	0.092335
Ube2i	5.27e-06	-0.14219	0.336	0.399	0.094497
Dkc1	5.37e-06	-0.12668	0.121	0.17	0.096218
Ikbip	5.39e-06	-0.10725	0.062	0.099	0.09666
Polr2h	5.42e-06	-0.09966	0.034	0.064	0.097037
Psmc4	5.44e-06	-0.16056	0.25	0.308	0.097424
R3hdm1	5.45e-06	-0.16646	0.192	0.246	0.097582
Nsun2	5.49e-06	-0.11979	0.073	0.113	0.098453
Gm47283	5.55e-06	-0.14218	0.109	0.156	0.09948
Prpf19	5.57e-06	-0.1078	0.076	0.117	0.099818
Snx7	5.6e-06	-0.08715	0.038	0.07	0.100343
AC160336.1	5.61e-06	0.094456	0.068	0.039	0.100479
Nova2	5.63e-06	0.150242	0.294	0.237	0.100858
Med19	5.63e-06	-0.15661	0.186	0.238	0.100891
Dnajc2	5.7e-06	-0.14548	0.105	0.151	0.102143
Gm32352	5.7e-06	0.050214	0.022	0.008	0.102192
Fgfr3	5.82e-06	0.069845	0.042	0.021	0.104375
Commd4	5.86e-06	-0.13823	0.143	0.193	0.105027
Bckdk	5.98e-06	-0.11791	0.067	0.105	0.107221
Sntb2	6.08e-06	-0.12784	0.104	0.149	0.108926
Map2k6	6.13e-06	-0.06728	0.014	0.036	0.10977
Gm609	6.14e-06	-0.09322	0.018	0.042	0.109951
Tomm22	6.27e-06	-0.15511	0.301	0.36	0.112374
Tpst2	6.29e-06	0.159569	0.386	0.329	0.112672
Paxbp1	6.38e-06	-0.14103	0.131	0.18	0.114346
Ndfip1	6.39e-06	-0.14409	0.643	0.69	0.114567
Cables2	6.4e-06	-0.11987	0.049	0.083	0.114644
Acot13	6.41e-06	-0.12855	0.116	0.162	0.114782
Usp46	6.67e-06	0.165474	0.372	0.313	0.119547
Hmgn3	6.68e-06	-0.1197	0.039	0.07	0.119657
Eif3j1	6.73e-06	-0.16617	0.362	0.419	0.120522
A930028N01Rik	6.81e-06	0.044734	0.015	0.004	0.121966
Ppard	6.89e-06	0.130554	0.282	0.226	0.123422
Atp5f1	7.07e-06	-0.143	0.591	0.634	0.126777
Tfg	7.09e-06	-0.15447	0.135	0.182	0.127089
Adamtsl2	7.2e-06	-0.08582	0.038	0.069	0.129053
Hist1h3e	7.23e-06	0.080796	0.046	0.024	0.129628
Exosc3	7.3e-06	-0.12781	0.101	0.144	0.130865
Cx3cl1	7.37e-06	-0.145	0.139	0.187	0.132089
Polr2c	7.38e-06	-0.15349	0.383	0.442	0.132254
Oga	7.45e-06	0.152795	0.304	0.248	0.133419
Pitpna	7.52e-06	0.167404	0.593	0.549	0.134843
Zfp971	7.57e-06	-0.06406	0.01	0.03	0.135645
Atp5mpl	7.57e-06	-0.14375	0.474	0.528	0.135667
Cct7	7.58e-06	-0.15353	0.447	0.501	0.135773
Gm35167	7.65e-06	-0.05406	0.003	0.018	0.137004
Nudt14	7.65e-06	-0.13701	0.106	0.15	0.137046
Abcg2	7.71e-06	0.09209	0.987	0.974	0.13812
Dnajb11	7.74e-06	-0.16085	0.272	0.329	0.138631
Btbd8	7.81e-06	-0.09424	0.018	0.041	0.140032
Ap3s1	7.84e-06	-0.16131	0.336	0.391	0.140505
Nfic	7.91e-06	-0.13371	0.525	0.579	0.141687
Gm32688	7.91e-06	-0.13134	0.083	0.124	0.141786
Ccdc32	7.92e-06	-0.14846	0.119	0.166	0.141905
Mrps15	7.99e-06	-0.13379	0.149	0.2	0.143092
Ppil3	8.07e-06	-0.10463	0.046	0.079	0.144668
Rps3a1	8.08e-06	0.088242	0.992	0.986	0.14471
Foxp1	8.08e-06	-0.10978	0.804	0.82	0.144877
Phldb2	8.13e-06	-0.15417	0.163	0.213	0.145609
Rela	8.15e-06	0.147348	0.264	0.21	0.145978
Mien1	8.25e-06	-0.15163	0.223	0.279	0.147815
Mcat	8.41e-06	-0.08045	0.015	0.037	0.150662
Pabpc1	8.43e-06	0.145557	0.69	0.645	0.151033
Ublcp1	8.53e-06	-0.15924	0.131	0.178	0.152858
Ppp1r35	8.54e-06	-0.15272	0.119	0.163	0.153097
Ankmy2	8.6e-06	-0.10481	0.055	0.09	0.154195
Gm26917	8.68e-06	-0.10568	0.066	0.103	0.155594
Stk16	8.7e-06	-0.14276	0.124	0.17	0.15582
Mau2	8.71e-06	0.147998	0.18	0.136	0.156106
Ankrd13a	8.97e-06	0.160437	0.363	0.308	0.160708
Polr2k	9e-06	-0.14328	0.387	0.447	0.161348
Gkap1	9.07e-06	-0.16134	0.262	0.32	0.162516
Fam102b	9.18e-06	0.087753	0.058	0.032	0.164418
Gm10076	9.21e-06	-0.13783	0.138	0.185	0.165057
Psmg3	9.24e-06	-0.11224	0.058	0.093	0.165599
Mydgf	9.37e-06	-0.141	0.28	0.339	0.167941
Il6ra	9.48e-06	-0.14528	0.119	0.163	0.169844
Kif13b	9.5e-06	-0.15796	0.151	0.198	0.170196
Hif3a	9.52e-06	0.031253	0.01	0.001	0.170513
Leng8	9.6e-06	0.155734	0.224	0.175	0.171946
Mrps10	9.66e-06	-0.08952	0.069	0.108	0.173054
LTO1	9.7e-06	-0.109	0.056	0.091	0.173877
Plpp3	9.83e-06	-0.10572	0.049	0.082	0.176069
Dusp16	9.87e-06	0.133275	0.117	0.081	0.176844
Eif2b4	9.89e-06	-0.12986	0.088	0.129	0.177209
Tmed1	1.03e-05	-0.10708	0.046	0.079	0.1851
Mocs2	1.06e-05	-0.14349	0.238	0.295	0.189065
Serpinh1	1.06e-05	-0.18468	0.384	0.436	0.189455
Tmem128	1.07e-05	-0.14123	0.272	0.329	0.191454
Dcun1d3	1.08e-05	0.171567	0.24	0.189	0.193303
Ss18l2	1.08e-05	-0.10569	0.079	0.118	0.19355
Zcchc17	1.08e-05	-0.13278	0.224	0.28	0.194095
Tef	1.09e-05	0.110069	0.089	0.057	0.194492
Sec11a	1.09e-05	-0.14785	0.293	0.353	0.19482
Pdcd7	1.09e-05	-0.132	0.112	0.158	0.195347
Cdk5rap3	1.09e-05	-0.11677	0.057	0.091	0.195362
Sox4	1.1e-05	-0.12534	0.072	0.11	0.196419
Tmem179b	1.11e-05	-0.12462	0.108	0.153	0.198702
Ap2a2	1.11e-05	-0.17902	0.347	0.4	0.199242
Gid8	1.12e-05	-0.14113	0.097	0.138	0.200066
Spata13	1.12e-05	-0.08671	0.035	0.064	0.2001
Tmem97	1.12e-05	-0.08246	0.018	0.042	0.200401
1110059G10Rik	1.12e-05	-0.15134	0.152	0.201	0.201288
Nifk	1.14e-05	-0.12465	0.108	0.152	0.203528
Cox7b	1.14e-05	-0.16292	0.503	0.553	0.204046
Wtip	1.14e-05	-0.10913	0.066	0.103	0.204504
Lysmd2	1.14e-05	-0.15587	0.199	0.252	0.205022
Limch1	1.16e-05	0.162701	0.609	0.554	0.208028
Cep164	1.16e-05	-0.10988	0.065	0.101	0.208266
Ifrd1	1.16e-05	0.171801	0.294	0.242	0.208625
Mageh1	1.17e-05	-0.11308	0.147	0.196	0.20887
Bcl9l	1.17e-05	-0.12154	0.062	0.097	0.209511
Gpr180	1.18e-05	-0.12509	0.055	0.089	0.210939
Pibf1	1.19e-05	-0.09979	0.085	0.127	0.212863
Mrpl22	1.19e-05	-0.1255	0.097	0.14	0.213303
Ddx54	1.19e-05	-0.16786	0.198	0.248	0.213708
Fam114a1	1.2e-05	-0.10265	0.034	0.062	0.214243
Gbp2	1.2e-05	-0.17021	0.154	0.2	0.215171
Tmem192	1.21e-05	0.099086	0.089	0.057	0.217196
Mppe1	1.21e-05	-0.07642	0.025	0.051	0.217488
Rab24	1.22e-05	-0.15884	0.153	0.201	0.218323
BC028528	1.24e-05	-0.15996	0.656	0.684	0.221662
Rab8b	1.24e-05	-0.14921	0.101	0.143	0.222682
Psmc1	1.27e-05	-0.17848	0.359	0.416	0.227617
Msx1	1.27e-05	-0.12358	0.042	0.072	0.227692
Cby1	1.28e-05	-0.13048	0.084	0.124	0.228552
Rae1	1.28e-05	-0.10384	0.084	0.125	0.229144
Fam168a	1.28e-05	0.168417	0.174	0.131	0.230055
Ick	1.29e-05	0.14813	0.344	0.287	0.230333
Nenf	1.29e-05	-0.14766	0.437	0.488	0.23192
Gtf2i	1.3e-05	-0.15424	0.379	0.435	0.233595
Slc7a1	1.36e-05	-0.13513	0.751	0.769	0.243406
Acat1	1.37e-05	-0.12994	0.14	0.188	0.244618
Rab9	1.37e-05	-0.15332	0.203	0.254	0.2448
Tubb4b	1.37e-05	-0.13936	0.505	0.561	0.24535
Foxq1	1.38e-05	-0.11866	0.787	0.839	0.247148
Zc3h13	1.4e-05	-0.16239	0.242	0.296	0.25026
Dgcr6	1.4e-05	-0.13048	0.156	0.205	0.25114
Senp5	1.43e-05	-0.15426	0.15	0.198	0.255542
Fgfr1	1.43e-05	0.094664	0.079	0.049	0.256878
Rai14	1.46e-05	0.159973	0.35	0.294	0.261409
Bbip1	1.46e-05	-0.15093	0.326	0.387	0.261559
Hmgb2	1.46e-05	0.186562	0.558	0.507	0.261843
Ruvbl2	1.48e-05	-0.09923	0.074	0.112	0.265496
Slc5a6	1.49e-05	-0.07652	0.021	0.044	0.266719
Sap18	1.5e-05	-0.14743	0.306	0.366	0.268628
Hba-a2	1.51e-05	-0.98255	0.001	0.013	0.270335
Gdi2	1.51e-05	0.141931	0.567	0.511	0.27038
Abhd5	1.52e-05	-0.14792	0.146	0.194	0.272259
Olfr920	1.52e-05	0.03227	0.012	0.003	0.273084
Hsp90aa1	1.52e-05	0.160283	0.696	0.659	0.273277
Kat14	1.54e-05	-0.11329	0.053	0.086	0.27617
Tubb2a	1.55e-05	0.17763	0.415	0.362	0.27696
Htra1	1.55e-05	-0.15652	0.155	0.204	0.277575
1500035N22Rik	1.55e-05	0.041554	0.014	0.004	0.278072
Psmd2	1.56e-05	-0.14623	0.248	0.304	0.278691
Mrpl28	1.56e-05	-0.13553	0.13	0.175	0.27952
Arl3	1.56e-05	-0.15386	0.221	0.275	0.280108
Nog	1.57e-05	-0.08883	0.009	0.027	0.280525
2023-03-05	1.57e-05	-0.16183	0.257	0.311	0.280711
Tapbpl	1.58e-05	-0.11127	0.078	0.117	0.283143
Zmynd8	1.59e-05	-0.14427	0.141	0.188	0.284802
Rrp15	1.59e-05	-0.11107	0.052	0.085	0.285263
Dmac1	1.66e-05	-0.12987	0.133	0.179	0.2968
1110008P14Rik	1.66e-05	-0.12964	0.108	0.151	0.297296
Mesd	1.66e-05	-0.14078	0.153	0.2	0.297512
Atf7ip	1.67e-05	-0.17328	0.183	0.231	0.299337
Rnpep	1.67e-05	-0.1105	0.091	0.132	0.299883
Ppp1r11	1.68e-05	-0.14462	0.351	0.404	0.300255
Gm15663	1.68e-05	-0.06573	0.015	0.036	0.301306
Nuak2	1.68e-05	0.062413	0.036	0.017	0.301476
2810004N23Rik	1.69e-05	-0.14009	0.115	0.158	0.30201
Kyat1	1.69e-05	0.06652	0.04	0.019	0.303404
Aifm1	1.7e-05	-0.11737	0.082	0.12	0.304783
Chrac1	1.71e-05	-0.15971	0.223	0.276	0.305818
Tdp2	1.71e-05	0.121384	0.139	0.1	0.306084
Ifi27l2a	1.73e-05	-0.1038	0.01	0.029	0.309325
Rras2	1.73e-05	-0.09399	0.053	0.087	0.310301
Smarcb1	1.74e-05	-0.14565	0.138	0.184	0.311469
Ssu72	1.74e-05	-0.15126	0.411	0.47	0.311973
Abhd8	1.76e-05	-0.10343	0.063	0.098	0.316004
Igtp	1.77e-05	-0.13162	0.057	0.091	0.316611
Snrpd2	1.78e-05	-0.15307	0.446	0.495	0.318713
Ubald1	1.81e-05	0.12033	0.15	0.109	0.324002
Usp39	1.83e-05	-0.1012	0.058	0.092	0.327094
G6pc3	1.83e-05	-0.08203	0.029	0.056	0.328461
Mphosph6	1.83e-05	-0.13449	0.104	0.145	0.328649
Rpl27	1.84e-05	0.091819	0.984	0.979	0.330346
Ola1	1.85e-05	-0.12208	0.164	0.213	0.331347
Cyfip1	1.86e-05	-0.12974	0.401	0.46	0.332603
Dars	1.86e-05	-0.11186	0.066	0.102	0.332865
Med31	1.86e-05	-0.13546	0.184	0.233	0.333908
0610009B22Rik	1.87e-05	-0.14097	0.098	0.138	0.335359
Mtmr11	1.87e-05	-0.09352	0.036	0.064	0.335613
Fam171a2	1.88e-05	-0.06635	0.017	0.039	0.337177
Mras	1.89e-05	-0.09225	0.053	0.087	0.338756
Pdcd10	1.91e-05	-0.12198	0.515	0.572	0.341592
Mlh3	1.91e-05	-0.1215	0.063	0.098	0.342186
Tbc1d1	1.92e-05	-0.14919	0.13	0.173	0.344112
Ddx58	1.94e-05	-0.14692	0.14	0.187	0.348272
Phyh	1.95e-05	-0.10434	0.057	0.09	0.34926
Emp2	1.95e-05	-0.18732	0.333	0.385	0.349903
Nsfl1c	1.97e-05	-0.16747	0.23	0.279	0.353184
Gata2	1.98e-05	0.16756	0.442	0.396	0.354486
Nabp2	2.04e-05	-0.13333	0.141	0.187	0.365073
Dap3	2.04e-05	-0.12212	0.1	0.14	0.365566
Dnaja4	2.05e-05	0.122441	0.139	0.1	0.367063
Fahd2a	2.07e-05	-0.09259	0.031	0.058	0.370353
Dnajc24	2.07e-05	-0.11682	0.083	0.122	0.37096
Nfib	2.08e-05	0.145218	0.853	0.83	0.372143
Ctbp2	2.09e-05	-0.14582	0.23	0.281	0.37437
Nudt2	2.09e-05	-0.09296	0.05	0.083	0.374727
Abracl	2.13e-05	-0.1428	0.132	0.176	0.381504
Wdr1	2.13e-05	0.148198	0.278	0.226	0.382237
Abcb1a	2.13e-05	0.08625	0.992	0.992	0.382413
Alg3	2.13e-05	-0.06246	0.01	0.029	0.382544
Slc25a25	2.14e-05	0.108059	0.092	0.06	0.384279
Itgav	2.15e-05	0.117659	0.092	0.06	0.38527
Rcor1	2.16e-05	-0.14772	0.135	0.181	0.386654
Mrpl40	2.2e-05	-0.10572	0.079	0.117	0.394302
Orc6	2.21e-05	-0.11207	0.079	0.117	0.395226
Abcf2	2.21e-05	-0.11776	0.076	0.112	0.395739
Usf1	2.22e-05	-0.11498	0.095	0.135	0.397267
Khdrbs1	2.23e-05	-0.13884	0.268	0.324	0.400297
Manbal	2.25e-05	-0.13408	0.118	0.161	0.402949
Abcf1	2.25e-05	-0.19568	0.335	0.386	0.403244
Cerk	2.26e-05	0.09636	0.082	0.052	0.404718
Rufy1	2.26e-05	-0.10694	0.09	0.13	0.405478
Egr3	2.27e-05	0.074091	0.057	0.033	0.406635
Utp11	2.27e-05	-0.16671	0.295	0.347	0.406837
Noc3l	2.29e-05	-0.09611	0.032	0.058	0.410405
Mrps26	2.34e-05	-0.13212	0.163	0.211	0.41892
Med10	2.37e-05	-0.15255	0.249	0.304	0.425469
Atp2a2	2.38e-05	0.158367	0.45	0.391	0.427274
Gm5089	2.39e-05	-0.0325	0	0.01	0.427623
Txndc16	2.39e-05	0.07891	0.072	0.044	0.427991
Mcrip1	2.41e-05	-0.15771	0.26	0.309	0.430984
Ccdc34	2.42e-05	-0.11199	0.089	0.129	0.433108
Vgll4	2.42e-05	0.149975	0.327	0.273	0.434268
Kank2	2.43e-05	-0.10869	0.061	0.095	0.435192
Stx6	2.46e-05	-0.12848	0.137	0.184	0.441232
Cmpk2	2.48e-05	-0.1514	0.115	0.157	0.44502
Spns2	2.5e-05	-0.11381	0.099	0.139	0.448268
Dlgap4	2.52e-05	0.126493	0.171	0.128	0.452377
Llgl1	2.54e-05	-0.09727	0.052	0.084	0.454291
Slain2	2.61e-05	-0.15208	0.298	0.354	0.467142
Lrrfip2	2.64e-05	-0.12031	0.152	0.202	0.472769
Atp5o	2.65e-05	-0.13636	0.469	0.518	0.47443
Csf1	2.66e-05	-0.09341	0.041	0.07	0.476344
Ipmk	2.67e-05	0.144165	0.192	0.149	0.477627
Polr3h	2.69e-05	-0.06391	0.017	0.038	0.482621
Meox1	2.71e-05	0.139073	0.134	0.096	0.486149
Kpna3	2.73e-05	-0.12539	0.089	0.127	0.489364
App	2.74e-05	0.077551	0.984	0.981	0.491046
Sos1	2.76e-05	0.174751	0.472	0.419	0.493857
Cdk13	2.78e-05	-0.14237	0.185	0.235	0.498053
Cyhr1	2.78e-05	-0.14447	0.245	0.297	0.498285
Sri	2.79e-05	-0.12218	0.649	0.695	0.499236
Map4k2	2.8e-05	0.129426	0.332	0.275	0.502481
Coro1c	2.81e-05	0.106411	0.154	0.114	0.50351
Ap2s1	2.82e-05	-0.13699	0.247	0.299	0.505695
Otud5	2.84e-05	0.124564	0.144	0.105	0.508101
Csnk2a1	2.84e-05	-0.1386	0.594	0.633	0.508802
Pno1	2.86e-05	-0.09599	0.04	0.068	0.51278
H2-M3	2.88e-05	-0.12508	0.108	0.149	0.51658
Rpl37	2.88e-05	0.073782	0.998	0.996	0.516891
Zfp326	2.9e-05	-0.16203	0.252	0.304	0.519942
Zfyve16	2.9e-05	-0.13141	0.093	0.132	0.520089
Nedd4	2.92e-05	-0.12314	0.641	0.685	0.523288
Gipc1	2.94e-05	-0.10325	0.081	0.118	0.526463
Hacd3	2.97e-05	-0.10575	0.058	0.091	0.532084
Tbkbp1	3e-05	0.122808	0.194	0.15	0.536837
Mcm6	3.03e-05	-0.10918	0.062	0.095	0.542336
Gstm7	3.04e-05	-0.16284	0.285	0.338	0.544718
Mitd1	3.06e-05	-0.15788	0.177	0.225	0.547901
Gm50232	3.07e-05	0.052228	0.028	0.012	0.550555
Avpi1	3.1e-05	-0.1018	0.054	0.086	0.556046
Ndufaf6	3.12e-05	-0.07965	0.021	0.043	0.55823
Rab14	3.12e-05	-0.14359	0.721	0.744	0.559904
Gtf3a	3.13e-05	-0.12014	0.079	0.115	0.560652
Dynlrb1	3.13e-05	-0.15279	0.498	0.54	0.561348
Slc10a1	3.14e-05	0.055644	0.026	0.011	0.562098
Erich1	3.14e-05	-0.15036	0.127	0.17	0.563496
Tmtc1	3.15e-05	0.150894	0.207	0.162	0.565282
Mrpl32	3.17e-05	-0.1306	0.148	0.195	0.567583
Taf11	3.17e-05	-0.12487	0.154	0.2	0.568506
Cdc37l1	3.18e-05	0.192372	0.479	0.431	0.570338
Bccip	3.19e-05	-0.1496	0.187	0.235	0.571686
Ltc4s	3.2e-05	-0.11639	0.04	0.068	0.573364
Smim12	3.23e-05	-0.13191	0.137	0.182	0.578147
Psmd9	3.24e-05	-0.12425	0.115	0.157	0.580878
Pin4	3.28e-05	-0.14699	0.242	0.29	0.588085
Dlc1	3.29e-05	0.153082	0.597	0.544	0.589151
Eif2b5	3.3e-05	-0.14954	0.117	0.158	0.591529
Ube2e1	3.3e-05	-0.12402	0.129	0.173	0.591834
Amd1	3.31e-05	-0.11675	0.08	0.118	0.5928
Msh3	3.41e-05	-0.12551	0.065	0.099	0.611894
Akap13	3.43e-05	0.169191	0.539	0.483	0.614428
Gatad1	3.43e-05	-0.14374	0.292	0.346	0.614733
Tpgs1	3.44e-05	-0.13007	0.13	0.174	0.616181
Bphl	3.47e-05	-0.09713	0.043	0.073	0.621976
Tomm5	3.51e-05	-0.14817	0.178	0.226	0.628304
Timm8b	3.54e-05	-0.13116	0.266	0.322	0.634151
Rrs1	3.56e-05	-0.10855	0.06	0.093	0.637978
Thumpd2	3.59e-05	-0.07084	0.014	0.034	0.642604
Dnajc12	3.61e-05	-0.07458	0.021	0.044	0.647392
Naa50	3.62e-05	-0.10768	0.147	0.195	0.648677
Cdk11b	3.63e-05	-0.14706	0.428	0.476	0.650987
Cetn2	3.68e-05	-0.14226	0.295	0.351	0.658607
Ywhaz	3.68e-05	0.122345	0.756	0.715	0.659984
Rad1	3.74e-05	-0.08894	0.035	0.062	0.669318
Tsen15	3.75e-05	-0.12802	0.124	0.168	0.671934
Pigp	3.77e-05	-0.13818	0.233	0.288	0.674867
Dap	3.79e-05	-0.14648	0.161	0.207	0.679476
Man1a2	3.79e-05	-0.12739	0.203	0.255	0.679657
Mdh2	3.8e-05	-0.1299	0.391	0.449	0.680841
Rpia	3.83e-05	-0.11311	0.066	0.1	0.685521
Cltb	3.84e-05	-0.13792	0.48	0.531	0.688026
Tmem70	3.85e-05	-0.1026	0.113	0.156	0.689928
Hlcs	3.89e-05	-0.11941	0.062	0.095	0.697591
Tnfrsf1a	3.9e-05	-0.11754	0.096	0.136	0.699731
Vdac3	3.93e-05	-0.12815	0.493	0.544	0.703813
Taf12	3.93e-05	-0.13526	0.133	0.175	0.704817
Cd9	3.95e-05	-0.12966	0.075	0.111	0.707018
Lig4	3.97e-05	-0.06338	0.01	0.027	0.710997
Sparc	3.97e-05	-0.11729	0.953	0.958	0.712016
Got2	3.98e-05	-0.12082	0.125	0.168	0.713457
Pik3r3	4.03e-05	-0.14576	0.117	0.158	0.721576
Orc2	4.04e-05	-0.11445	0.063	0.097	0.723371
Usp3	4.06e-05	-0.12107	0.123	0.166	0.728361
Arpc5l	4.12e-05	-0.15027	0.259	0.31	0.737437
Elf1	4.2e-05	-0.15791	0.36	0.411	0.751827
Tmed4	4.23e-05	-0.14005	0.248	0.3	0.757679
Nqo2	4.25e-05	-0.09338	0.061	0.094	0.761819
Etfb	4.27e-05	-0.14309	0.421	0.474	0.765489
Snrpc	4.3e-05	-0.15074	0.251	0.299	0.770754
Fkbp8	4.35e-05	-0.14159	0.274	0.331	0.779204
Osgep	4.36e-05	-0.13477	0.147	0.19	0.781789
Ifi27	4.37e-05	-0.15034	0.615	0.669	0.782227
Mrpl51	4.37e-05	-0.12742	0.232	0.285	0.782909
Thap3	4.41e-05	-0.13171	0.172	0.222	0.789991
Cep162	4.41e-05	-0.10425	0.043	0.071	0.790966
Ndufs4	4.46e-05	-0.16237	0.354	0.401	0.79854
Cald1	4.47e-05	-0.16415	0.242	0.295	0.800168
Fam3c	4.52e-05	-0.14553	0.196	0.244	0.809547
Arl1	4.54e-05	-0.1251	0.454	0.505	0.813399
Ddah1	4.54e-05	-0.14702	0.241	0.291	0.813532
Ptges3	4.61e-05	-0.14178	0.521	0.563	0.825623
Srp19	4.64e-05	-0.13272	0.332	0.388	0.831553
Apol10b	4.66e-05	-0.07409	0.02	0.042	0.835105
Bcl7c	4.71e-05	-0.12654	0.237	0.291	0.844887
Snap47	4.74e-05	-0.11339	0.08	0.117	0.849807
Naa25	4.8e-05	-0.09694	0.034	0.06	0.859468
Stxbp6	4.8e-05	0.144304	0.253	0.205	0.860815
Rps5	4.83e-05	0.076711	0.988	0.984	0.864641
Klhl26	4.83e-05	-0.07198	0.023	0.046	0.864758
Hip1	4.83e-05	-0.13062	0.602	0.637	0.865538
Tpra1	4.94e-05	-0.12471	0.093	0.131	0.884707
Tulp4	4.96e-05	-0.15069	0.243	0.294	0.888258
Inip	5.01e-05	-0.08231	0.048	0.078	0.897311
Mpp2	5.03e-05	0.066907	0.035	0.017	0.901502
Scarb2	5.06e-05	-0.13453	0.151	0.196	0.906922
Sde2	5.08e-05	-0.13202	0.149	0.194	0.910796
Creg1	5.09e-05	-0.13583	0.131	0.173	0.912662
Uimc1	5.12e-05	-0.12169	0.153	0.197	0.917851
Tmf1	5.15e-05	-0.15354	0.288	0.338	0.922676
BC005624	5.18e-05	-0.14701	0.283	0.331	0.928264
Wdr18	5.2e-05	-0.11144	0.06	0.091	0.931434
Pdrg1	5.29e-05	-0.12655	0.236	0.289	0.947842
Sdhaf2	5.31e-05	-0.09881	0.106	0.147	0.950841
Ephx1	5.32e-05	-0.16241	0.212	0.261	0.953153
3222401L13Rik	5.32e-05	-0.12664	0.14	0.185	0.953896
Arid5b	5.33e-05	-0.11799	0.616	0.675	0.954787
Golgb1	5.33e-05	-0.16911	0.324	0.374	0.954846
Ddx3y	5.33e-05	0.098579	0.264	0.209	0.955549
Fip1l1	5.37e-05	-0.13762	0.237	0.291	0.961696
Sar1b	5.4e-05	-0.13667	0.303	0.353	0.967548
Actr2	5.43e-05	-0.14709	0.362	0.413	0.972976
Tnrc6b	5.46e-05	-0.14152	0.34	0.393	0.978684
2310011J03Rik	5.57e-05	-0.10185	0.105	0.146	0.997676
Chmp2b	5.6e-05	-0.15899	0.304	0.359	1
Nudt9	5.62e-05	-0.11726	0.169	0.217	1
H2-T23	5.63e-05	-0.14275	0.57	0.61	1
Thoc1	5.67e-05	-0.13409	0.186	0.234	1
Atp23	5.69e-05	-0.05232	0.006	0.021	1
Crot	5.76e-05	-0.10609	0.067	0.101	1
Fadd	5.78e-05	-0.08077	0.024	0.047	1
Dand5	5.8e-05	-0.08121	0.03	0.055	1
Ncor1	5.81e-05	-0.13721	0.586	0.623	1
Tomm70a	5.85e-05	-0.12799	0.152	0.194	1
[truncated: 15,922 more rows]
