# Supplementary material for: Safe focused ultrasound-mediated blood-brain barrier opening is driven primarily by transient reorganization of tight junctions
Source: bioRxiv preprint, doi:10.1101/2025.01.28.635258, version 1 (2025-01-31)
Supplement: Table 4 [file 635258_file12.xlsx]

## Sheet: Sheet1
Dataset S3 - Differentially expressed genes for capillaries 72 hours after exposure to 750 kPa FUS.
	p_val	avg_log2FC	pct.1	pct.2	p_val_adj
Nostrin	0	0.892464	0.981	0.863	0
Jun	0	-1.15726	0.927	0.973	0
Slc2a1	0	0.984607	1	0.989	0
Plat	0	1.02335	0.918	0.696	0
Ctla2a	0	1.08687	0.99	0.939	0
Ndrg1	0	0.873707	0.959	0.848	0
Malat1	0	-0.767563	0.998	1	0
Snrk	2.77827e-305	0.835712	0.923	0.696	4.97867e-301
Slc6a6	2.0025e-298	-0.919145	0.802	0.938	3.58849e-294
Tpt1	7.87646e-296	0.481351	0.999	0.998	1.41146e-291
Tsc22d3	1.94507e-294	0.849263	0.951	0.787	3.48557e-290
Cttnbp2nl	6.3011e-292	0.938091	0.783	0.431	1.12916e-287
Tmcc3	3.57098e-290	1.07243	0.712	0.354	6.3992e-286
Pim3	2.26135e-286	0.924608	0.903	0.679	4.05234e-282
Pglyrp1	5.98413e-278	0.716866	0.992	0.959	1.07236e-273
Akap12	1.02365e-263	1.05818	0.913	0.737	1.83438e-259
Clip1	6.74777e-260	0.890608	0.817	0.54	1.2092e-255
Tmem252	2.7164e-250	1.18624	0.733	0.42	4.86779e-246
Ucp2	2.73981e-245	0.950446	0.791	0.533	4.90974e-241
Ctla2b	2.2138e-241	0.967037	0.717	0.388	3.96713e-237
Cldn5	4.66579e-240	-0.370586	1	1	8.36109e-236
Lrrn3	3.25297e-234	-1.06767	0.173	0.473	5.82933e-230
Tnfrsf12a	9.25009e-232	0.970093	0.522	0.186	1.65762e-227
Jund	2.67956e-218	-0.773246	0.98	0.982	4.80177e-214
Synm	1.38244e-216	0.85522	0.809	0.571	2.47734e-212
Zbtb16	1.48701e-211	0.764181	0.328	0.048	2.66473e-207
mt-Cytb	1.2949e-200	0.407505	1	0.998	2.32046e-196
Mal	5.2279e-199	0.809398	0.937	0.838	9.36839e-195
Cdc42ep3	2.49779e-194	0.797474	0.829	0.573	4.47604e-190
Klf2	7.66852e-192	-0.680091	0.986	0.997	1.3742e-187
Plxna2	2.19377e-181	0.833831	0.686	0.419	3.93124e-177
Net1	4.49229e-180	0.781768	0.757	0.489	8.05018e-176
Cxcl12	9.71338e-180	-0.655064	0.984	0.992	1.74064e-175
Grb14	1.74898e-178	-0.840854	0.32	0.573	3.13417e-174
Selenop	7.8065e-177	0.593404	0.992	0.972	1.39892e-172
Maff	5.81169e-175	0.758951	0.5	0.202	1.04145e-170
Trp53inp1	1.58754e-169	0.832025	0.448	0.168	2.84487e-165
Sec14l1	1.02512e-162	0.699189	0.697	0.427	1.83702e-158
Map3k6	2.41339e-161	0.679429	0.348	0.094	4.3248e-157
Mcf2l	1.22779e-160	0.675688	0.726	0.476	2.2002e-156
Rgcc	1.46409e-158	0.748185	0.919	0.821	2.62366e-154
Gimap6	1.2312e-156	0.631698	0.847	0.659	2.20631e-152
Fam107a	4.6795e-156	0.708178	0.427	0.158	8.38567e-152
Pakap.1	5.34355e-154	0.560202	0.946	0.856	9.57564e-150
mt-Co3	4.07541e-153	0.40294	0.998	0.995	7.30313e-149
Fos	8.58638e-153	-1.30948	0.664	0.8	1.53868e-148
Rps14	1.34685e-151	0.364917	0.996	0.983	2.41355e-147
Nfkbia	4.59298e-151	0.428719	0.996	0.982	8.23061e-147
Hspa1b	6.26749e-150	-1.21682	0.271	0.51	1.12313e-145
Rpl13a	3.27755e-149	0.436995	0.976	0.929	5.87338e-145
mt-Atp6	5.95577e-145	0.359601	0.999	0.999	1.06727e-140
mt-Co2	1.27882e-140	0.343621	0.999	0.999	2.29165e-136
Rgs12	1.63942e-137	0.623429	0.812	0.631	2.93784e-133
Plaur	1.29196e-133	0.680409	0.305	0.085	2.3152e-129
Gnai2	1.19158e-132	0.34649	0.996	0.984	2.13531e-128
Tsc22d1	4.50549e-131	0.390365	0.998	0.991	8.07384e-127
Acer2	9.2034e-129	0.637231	0.609	0.353	1.64925e-124
Smad1	2.14555e-128	0.64014	0.512	0.256	3.84483e-124
Rps6	1.59062e-126	0.445526	0.943	0.854	2.85039e-122
Cobll1	8.46318e-126	-0.699824	0.315	0.529	1.5166e-121
Rhoc	1.48868e-125	0.647508	0.746	0.55	2.66772e-121
Pik3ip1	5.4113e-124	0.588662	0.68	0.437	9.69704e-120
Tgfb2	1.25435e-121	-0.847585	0.223	0.431	2.2478e-117
Hmcn1	1.82123e-120	-0.556377	0.876	0.923	3.26364e-116
Rps12	3.20057e-119	0.340302	0.992	0.978	5.73541e-115
Fas	2.27289e-117	0.55112	0.743	0.52	4.07302e-113
Rnf103	2.82737e-116	0.634206	0.453	0.219	5.06665e-112
Btg1	2.85257e-116	-0.735515	0.467	0.65	5.1118e-112
Wfdc1	6.46114e-115	0.47803	0.914	0.815	1.15784e-110
Tpm4	1.11406e-114	0.469536	0.902	0.788	1.9964e-110
Tmsb4x	1.47546e-113	0.255299	1	1	2.64402e-109
Rpl17	2.85184e-113	0.353645	0.984	0.954	5.1105e-109
Eef1a1	2.88489e-113	0.312185	0.998	0.994	5.16973e-109
Galnt15	9.1806e-113	0.64034	0.365	0.149	1.64516e-108
Clic4	6.50257e-111	0.484015	0.906	0.8	1.16526e-106
Timp3	6.84369e-111	0.550606	0.909	0.8	1.22639e-106
Ets1	1.99297e-110	-0.57826	0.587	0.734	3.57141e-106
Rps15	3.83871e-110	0.414456	0.943	0.858	6.87896e-106
Irak2	7.96972e-110	0.551035	0.361	0.143	1.42817e-105
Fosb	1.46511e-109	-0.883198	0.378	0.573	2.62548e-105
Cdkn1a	8.20154e-108	0.45672	0.966	0.907	1.46972e-103
Rps29	1.2428e-107	-0.248607	0.999	1	2.22709e-103
Rplp1	1.27709e-107	0.287207	0.998	0.993	2.28854e-103
Fzd4	1.90214e-105	0.532778	0.702	0.481	3.40864e-101
Kbtbd11	3.00739e-105	0.608873	0.457	0.232	5.38925e-101
Arpc3	5.23488e-105	0.390219	0.953	0.885	9.3809e-101
Hspa1a	7.24653e-105	-1.08598	0.386	0.575	1.29858e-100
Angptl4	5.33317e-102	0.735905	0.265	0.084	9.55704e-98
Ccny	1.60074e-101	0.517805	0.71	0.507	2.86852e-97
Apold1	5.95679e-101	0.503421	0.806	0.604	1.06746e-96
Cbx3	1.63233e-100	-0.550511	0.62	0.751	2.92513e-96
Clec2d	8.63433e-99	-0.535443	0.737	0.844	1.54727e-94
Mat2a	2.66119e-98	0.551527	0.657	0.441	4.76885e-94
Rasip1	4.8465e-98	0.469084	0.82	0.656	8.68493e-94
Tmc7	1.33835e-96	0.530979	0.473	0.249	2.39832e-92
Sash1	5.30411e-95	0.506512	0.786	0.615	9.50497e-91
Rpl12	1.33737e-94	0.420626	0.889	0.772	2.39656e-90
Txnip	1.66125e-94	0.524546	0.805	0.632	2.97696e-90
Rpl35	3.95819e-94	-0.380021	0.906	0.942	7.09308e-90
Paqr5	1.17599e-93	0.455157	0.813	0.651	2.10737e-89
mt-Nd1	6.46949e-92	0.36365	0.978	0.948	1.15933e-87
Zfp36l1	1.02699e-91	-0.484765	0.786	0.868	1.84037e-87
Esam	2.90964e-91	0.358999	0.969	0.926	5.21408e-87
Rpl26	3.20268e-91	0.280772	0.994	0.989	5.73921e-87
Adgrl4	3.41255e-90	0.330635	0.992	0.978	6.11529e-86
Klf9	1.74212e-89	0.442065	0.87	0.733	3.12188e-85
Usp54	4.30141e-89	0.516931	0.392	0.191	7.70812e-85
Pon2	3.26103e-87	0.445984	0.784	0.615	5.84376e-83
Rpl5	1.92716e-86	0.390165	0.892	0.777	3.45347e-82
Myl6	3.06057e-86	0.279336	0.997	0.99	5.48454e-82
Pmp22	7.34466e-86	0.558497	0.436	0.232	1.31616e-81
Dynll1	2.06223e-85	-0.373305	0.907	0.946	3.69552e-81
Cavin2	7.8362e-85	0.431296	0.921	0.832	1.40425e-80
Pnpla2	9.98934e-84	0.500621	0.578	0.365	1.79009e-79
Rack1	7.56556e-83	0.373649	0.905	0.804	1.35575e-78
Slc25a33	2.79847e-81	0.514952	0.335	0.152	5.01486e-77
Tfrc	2.74427e-80	-0.636483	0.529	0.677	4.91774e-76
Tek	5.06282e-80	-0.430475	0.777	0.849	9.07258e-76
mt-Nd2	9.54413e-80	0.294323	0.997	0.987	1.71031e-75
Litaf	1.10583e-79	0.405712	0.178	0.043	1.98165e-75
Pttg1ip	7.95321e-79	0.414912	0.783	0.622	1.42522e-74
Klf4	1.13472e-78	-0.59667	0.867	0.912	2.03342e-74
Lrrc8a	2.6286e-78	0.504392	0.53	0.329	4.71046e-74
Tinagl1	7.9001e-78	0.524789	0.779	0.649	1.4157e-73
Actg1	1.1598e-77	0.334479	0.993	0.986	2.07837e-73
Actb	1.5125e-77	0.286707	0.999	0.999	2.71039e-73
Foxp1	6.02309e-77	-0.436015	0.738	0.82	1.07934e-72
Synpo2	2.95341e-76	-0.393609	0.049	0.165	5.29251e-72
St8sia4	1.32824e-75	-0.51075	0.465	0.615	2.3802e-71
Myh9	1.9579e-75	0.470452	0.837	0.717	3.50857e-71
Rpl7	8.49354e-75	0.276452	0.982	0.964	1.52204e-70
Tnfrsf19	1.45201e-74	-0.510489	0.301	0.461	2.602e-70
Junb	5.54738e-74	-0.813972	0.85	0.863	9.9409e-70
Grasp	1.32703e-72	0.486228	0.743	0.591	2.37803e-68
Chst2	2.96101e-72	0.433576	0.238	0.088	5.30613e-68
Gimap5	9.2529e-72	0.422778	0.375	0.19	1.65812e-67
Ttll7	2.78825e-71	0.417334	0.793	0.65	4.99654e-67
Klf3	5.07127e-71	0.489756	0.633	0.453	9.08771e-67
Spsb1	2.09729e-70	0.384052	0.194	0.059	3.75835e-66
Mxd4	2.60716e-70	0.43176	0.678	0.51	4.67203e-66
Proser2	9.10545e-70	0.454009	0.617	0.433	1.6317e-65
S1pr1	1.01188e-69	0.298589	0.98	0.958	1.81329e-65
Fkbp5	5.60834e-69	0.303658	0.115	0.014	1.00501e-64
Rps23	6.07369e-69	0.229655	0.995	0.99	1.08841e-64
Ppp1r2	1.20864e-68	0.393316	0.822	0.702	2.16588e-64
Rps18	2.61553e-68	0.251521	0.986	0.976	4.68703e-64
Fn1	5.35371e-68	0.372027	0.925	0.863	9.59384e-64
Apoe	6.90884e-68	0.3992	0.957	0.904	1.23806e-63
Lims2	4.14073e-67	0.412661	0.695	0.521	7.42019e-63
Rpl23	5.75524e-67	0.224626	0.995	0.995	1.03134e-62
Zfp608	1.40505e-66	-0.372476	0.044	0.148	2.51786e-62
Pdgfb	2.95499e-66	-0.441013	0.608	0.723	5.29534e-62
Shld1	3.21605e-66	0.471957	0.462	0.279	5.76317e-62
Xdh	9.14468e-66	0.500483	0.707	0.561	1.63873e-61
Bcl2l1	1.76589e-64	0.417627	0.635	0.453	3.16448e-60
Adgrg1	4.18661e-64	0.392915	0.632	0.451	7.5024e-60
Slc40a1	4.46611e-64	-0.499103	0.516	0.636	8.00326e-60
Ptprb	2.92426e-62	0.291893	0.988	0.965	5.24027e-58
Doc2b	2.14809e-61	0.254108	0.096	0.01	3.84938e-57
Kitl	2.85222e-61	-0.367936	0.832	0.899	5.11118e-57
Rps3	3.58975e-61	0.239976	0.985	0.972	6.43284e-57
Rpl27a	6.66749e-61	0.192379	0.998	0.997	1.19481e-56
Rnf125	9.45939e-61	0.39955	0.568	0.387	1.69512e-56
Slc1a1	9.99036e-61	0.368471	0.808	0.667	1.79027e-56
Ackr3	1.05988e-60	0.481437	0.441	0.268	1.89931e-56
Crem	1.06295e-60	0.38624	0.403	0.23	1.90481e-56
Rpl28	1.45177e-60	0.229949	0.993	0.989	2.60157e-56
Nmt1	3.8419e-60	-0.404303	0.547	0.666	6.88468e-56
Rps25	3.51264e-59	0.251907	0.974	0.947	6.29466e-55
Son	8.68118e-59	-0.287553	0.915	0.952	1.55567e-54
Lpar6	1.26415e-58	-0.546181	0.24	0.383	2.26535e-54
Fermt2	1.74211e-58	0.291645	0.963	0.935	3.12186e-54
Angpt2	1.24297e-57	0.482595	0.166	0.054	2.22741e-53
Herpud1	9.47201e-57	0.387509	0.599	0.425	1.69738e-52
Ranbp9	1.10683e-56	0.405459	0.33	0.176	1.98344e-52
Fnbp1l	1.13804e-56	0.382156	0.776	0.643	2.03936e-52
Rps11	3.38128e-56	0.283386	0.968	0.939	6.05926e-52
Hspb1	3.38527e-56	-0.418735	0.965	0.98	6.0664e-52
Sult1a1	1.60999e-55	0.411751	0.397	0.235	2.8851e-51
Fam117b	1.65702e-55	0.403597	0.506	0.338	2.96937e-51
Ndnf	3.07271e-55	-0.646099	0.285	0.421	5.50631e-51
Fut8	7.12126e-55	-0.453047	0.373	0.507	1.27613e-50
Il10rb	7.76403e-55	-0.409649	0.536	0.646	1.39131e-50
Csnk1e	1.0987e-54	0.387808	0.454	0.285	1.96887e-50
Klf7	1.69602e-54	0.376191	0.781	0.658	3.03927e-50
Slc3a2	1.09562e-53	0.29311	0.941	0.88	1.96336e-49
Rps3a1	2.02779e-53	0.225035	0.992	0.986	3.63381e-49
Rps16	4.40767e-53	0.194238	0.998	0.996	7.89854e-49
Mgat4a	6.22461e-53	0.309648	0.153	0.048	1.11545e-48
Plpp6	7.57362e-53	0.402421	0.608	0.451	1.35719e-48
Ccdc141	1.3597e-52	0.329435	0.918	0.856	2.43659e-48
Ccn2	2.36846e-52	0.56587	0.447	0.285	4.24428e-48
Rpl32	6.13623e-52	0.212419	0.99	0.987	1.09961e-47
Rdx	1.58016e-51	-0.364427	0.768	0.831	2.83164e-47
Slc39a10	5.52604e-51	-0.299951	0.89	0.923	9.90266e-47
Lmcd1	1.31424e-50	0.361643	0.215	0.094	2.35511e-46
Snx3	2.93415e-50	-0.309152	0.808	0.866	5.25799e-46
Wasf2	4.74753e-50	0.306451	0.859	0.781	8.50757e-46
Rapgef4	5.61523e-50	-0.358367	0.716	0.792	1.00625e-45
Tubb2a	1.11911e-49	0.422097	0.519	0.362	2.00544e-45
Id3	5.95001e-49	-0.326141	0.959	0.974	1.06624e-44
Cpe	8.77662e-49	0.432334	0.342	0.2	1.57277e-44
Sesn1	1.40135e-48	0.365046	0.483	0.322	2.51122e-44
Eef2	2.1693e-48	0.299274	0.838	0.742	3.88738e-44
Rpl3	2.32011e-48	0.235082	0.968	0.943	4.15764e-44
Gjc1	3.99262e-48	0.339151	0.666	0.513	7.15478e-44
mt-Atp8	2.64274e-47	-0.353455	0.594	0.689	4.73578e-43
Sgpp2	2.69658e-47	-0.410072	0.221	0.344	4.83227e-43
Slc38a2	3.2995e-47	-0.438909	0.781	0.84	5.9127e-43
Rpl38	4.00209e-47	-0.177296	0.999	0.999	7.17175e-43
Cox4i1	4.24882e-47	0.248755	0.93	0.863	7.61389e-43
Rpl13	4.87336e-47	0.166745	1	0.998	8.73306e-43
Tnfaip1	5.39378e-47	0.358121	0.515	0.358	9.66565e-43
Slc9a3r2	6.34015e-47	-0.313445	0.911	0.935	1.13616e-42
Zhx3	2.10663e-46	0.369033	0.402	0.252	3.77508e-42
mt-Co1	4.69054e-46	0.187609	0.998	0.997	8.40546e-42
Mecom	1.38903e-45	-0.334312	0.655	0.745	2.48913e-41
Gm9946	2.66055e-45	-0.427588	0.113	0.219	4.76771e-41
Myct1	5.35205e-45	-0.382603	0.118	0.224	9.59087e-41
Cyth1	6.21245e-45	0.323597	0.334	0.194	1.11327e-40
AC149090.1	4.47091e-44	-0.438438	0.339	0.456	8.01187e-40
Serinc3	7.15077e-44	0.256393	0.94	0.894	1.28142e-39
Myl12a	8.8949e-44	0.282551	0.935	0.888	1.59397e-39
Itga6	8.9428e-44	0.301798	0.871	0.78	1.60255e-39
Gcnt2	9.25385e-44	0.365194	0.534	0.386	1.65829e-39
Tiam1	1.32707e-43	-0.38705	0.478	0.589	2.37811e-39
Dleu2	2.1286e-43	-0.404147	0.124	0.229	3.81445e-39
Asb4	2.62913e-43	0.435727	0.241	0.124	4.7114e-39
Ifnar1	4.77685e-43	-0.407795	0.422	0.531	8.56012e-39
Rnf144b	6.17799e-43	0.331208	0.554	0.402	1.1071e-38
Msrb2	9.77812e-43	-0.364838	0.139	0.248	1.75224e-38
Tuba1a	1.15094e-42	0.359593	0.846	0.777	2.06249e-38
Rpl4	1.19913e-42	0.284698	0.832	0.724	2.14885e-38
Cebpd	1.3807e-42	0.444694	0.63	0.489	2.47421e-38
Psma6	1.99355e-42	0.31652	0.706	0.574	3.57243e-38
Rps9	2.83365e-42	0.195061	0.983	0.974	5.07789e-38
Cd59a	2.86242e-42	0.343797	0.742	0.623	5.12946e-38
Rpl14	3.38744e-42	0.230145	0.95	0.91	6.07029e-38
Sgms1	4.36022e-42	0.21789	0.974	0.935	7.81351e-38
Rps20	5.23428e-42	0.178084	0.996	0.994	9.37983e-38
Pxdc1	1.33669e-41	0.323926	0.264	0.141	2.39535e-37
Cox7a2l	1.45109e-41	0.291635	0.745	0.623	2.60035e-37
Pdxk	2.53488e-41	0.341191	0.528	0.377	4.5425e-37
2900026A02Rik	3.52658e-41	0.322871	0.558	0.407	6.31963e-37
Prpf4b	4.20994e-41	-0.359532	0.555	0.654	7.54422e-37
Vim	4.80884e-41	0.31653	0.93	0.896	8.61745e-37
Lmo2	5.31099e-41	-0.358283	0.723	0.777	9.51729e-37
Rps8	7.21206e-41	0.149965	0.999	0.999	1.2924e-36
Ptp4a2	8.55525e-41	0.312903	0.64	0.501	1.5331e-36
Ramp2	1.35726e-40	0.248218	0.982	0.967	2.43221e-36
Rpl10a	1.98537e-40	0.234351	0.924	0.879	3.55778e-36
Gimap1	2.24062e-40	0.318555	0.675	0.541	4.01519e-36
Rplp0	2.65506e-40	0.228769	0.961	0.935	4.75787e-36
Afap1l2	2.79064e-40	-0.361657	0.169	0.277	5.00083e-36
Sema6a	4.79735e-40	-0.409662	0.27	0.382	8.59686e-36
Rps5	6.79263e-40	0.184715	0.991	0.984	1.21724e-35
Kdr	1.22059e-39	-0.315342	0.859	0.888	2.18729e-35
Sh2d3c	1.58972e-39	0.317588	0.407	0.265	2.84877e-35
Gm26802	1.66808e-39	-0.502485	0.144	0.248	2.98921e-35
Pfdn1	2.69152e-39	-0.341124	0.448	0.553	4.82321e-35
Cables1	2.83986e-39	0.255679	0.151	0.06	5.08902e-35
Ets2	3.33685e-39	-0.399328	0.254	0.364	5.97964e-35
Ddit4	3.41361e-39	0.362588	0.53	0.386	6.11719e-35
Adipor2	4.02874e-39	0.315263	0.623	0.481	7.2195e-35
Zic2	4.9076e-39	-0.399163	0.354	0.463	8.79442e-35
Ly6c1	5.90743e-39	0.177126	0.999	1	1.05861e-34
Xist	8.06557e-39	0.26822	0.384	0.232	1.44535e-34
Adamts9	9.50038e-39	0.250371	0.109	0.033	1.70247e-34
Klhl2	2.31672e-38	0.293917	0.339	0.207	4.15157e-34
Pcp4l1	2.38202e-38	-0.269121	0.9	0.92	4.26858e-34
Apod	2.86746e-38	0.361482	0.349	0.22	5.13849e-34
Axin2	5.16442e-38	-0.39144	0.237	0.348	9.25465e-34
Bcar3	6.77023e-38	0.266865	0.162	0.07	1.21322e-33
Isg15	7.50283e-38	-0.594158	0.27	0.379	1.34451e-33
Plk2	8.62942e-38	-0.546857	0.557	0.633	1.54639e-33
Sptbn1	1.44737e-37	0.199803	0.998	0.994	2.59369e-33
Arglu1	1.86562e-37	-0.345194	0.554	0.643	3.34319e-33
Macf1	1.95622e-37	0.251248	0.961	0.926	3.50554e-33
Itm2c	3.49017e-37	0.328925	0.449	0.307	6.25439e-33
Tbx3	3.66514e-37	-0.384477	0.347	0.458	6.56794e-33
Dusp1	4.3021e-37	-0.403474	0.9	0.908	7.70936e-33
Zyx	6.47453e-37	0.278997	0.216	0.11	1.16024e-32
Mafg	6.79719e-37	0.288932	0.347	0.218	1.21806e-32
Ybx1	7.01249e-37	0.193452	0.962	0.936	1.25664e-32
Arpc1b	8.03583e-37	0.257372	0.832	0.747	1.44002e-32
Atp5k	8.17333e-37	-0.304998	0.636	0.702	1.46466e-32
Ism1	1.19136e-36	0.290634	0.225	0.118	2.13492e-32
Clic1	1.46974e-36	0.269859	0.819	0.743	2.63377e-32
Rpl23a	1.82109e-36	0.245354	0.863	0.791	3.2634e-32
Hspa8	2.22235e-36	0.207116	0.976	0.964	3.98245e-32
Hlx	2.8138e-36	-0.284912	0.057	0.133	5.04233e-32
Pitpna	4.02717e-36	0.285135	0.676	0.549	7.2167e-32
Dapk1	4.1412e-36	0.267366	0.233	0.123	7.42104e-32
Rps13	4.7925e-36	0.185339	0.986	0.972	8.58816e-32
Chka	5.73003e-36	0.301091	0.363	0.234	1.02682e-31
Slc22a8	6.83543e-36	0.265952	0.833	0.727	1.22491e-31
Pkp4	1.20715e-35	0.297225	0.437	0.302	2.16321e-31
Rhoa	2.05588e-35	0.201315	0.968	0.949	3.68414e-31
Vcl	2.3701e-35	0.375374	0.395	0.269	4.24721e-31
Rbpms	5.2404e-35	0.301652	0.661	0.536	9.3908e-31
Vapa	7.06883e-35	0.300577	0.656	0.526	1.26673e-30
Csrp2	7.12085e-35	0.308559	0.813	0.726	1.27606e-30
Tmeff1	7.84436e-35	0.316586	0.388	0.261	1.40571e-30
Kcna5	9.12499e-35	0.189284	0.088	0.023	1.6352e-30
Rps4x	1.24465e-34	0.17338	0.99	0.988	2.23041e-30
Tcp11l2	1.40045e-34	0.267875	0.274	0.157	2.50961e-30
Pmaip1	1.99925e-34	0.442082	0.296	0.183	3.58266e-30
Prickle1	2.39049e-34	-0.336776	0.19	0.293	4.28376e-30
Bsdc1	2.92998e-34	0.262948	0.296	0.177	5.25052e-30
Brd9	3.27926e-34	-0.326796	0.359	0.465	5.87644e-30
Lef1	3.73554e-34	-0.293592	0.778	0.829	6.69408e-30
Meox1	4.60096e-34	0.301101	0.191	0.096	8.24492e-30
Dync1i2	4.62664e-34	-0.309044	0.76	0.798	8.29095e-30
Sparcl1	5.62673e-34	0.202341	0.992	0.984	1.00831e-29
Calm1	7.41711e-34	0.172739	0.999	0.996	1.32915e-29
Ier3	9.03472e-34	-0.609905	0.495	0.577	1.61902e-29
Notch1	1.0424e-33	0.291159	0.646	0.52	1.86798e-29
Dock9	1.09904e-33	0.27212	0.738	0.628	1.96948e-29
Tpst2	1.88332e-33	0.286453	0.464	0.329	3.37492e-29
Rps7	1.92303e-33	0.173913	0.99	0.989	3.44608e-29
B4galt4	2.48694e-33	0.300659	0.636	0.514	4.45659e-29
Fam13c	3.17085e-33	-0.358069	0.427	0.521	5.68216e-29
Gpr146	3.67239e-33	0.294059	0.62	0.491	6.58093e-29
Saraf	4.94491e-33	0.265399	0.683	0.548	8.86128e-29
Eif1	7.07256e-33	0.145385	0.999	0.998	1.2674e-28
Hectd1	8.88913e-33	0.271809	0.637	0.505	1.59293e-28
Rap1b	1.27391e-32	0.252867	0.746	0.636	2.28284e-28
Rsrp1	1.90226e-32	-0.284823	0.733	0.794	3.40885e-28
Prkacb	2.27037e-32	0.285369	0.481	0.348	4.06851e-28
Mef2d	2.35595e-32	0.260075	0.322	0.203	4.22186e-28
Abhd2	3.17492e-32	-0.291946	0.721	0.774	5.68946e-28
Ttr	3.81172e-32	0.226188	0.071	0.016	6.8306e-28
Ccdc85a	4.56979e-32	0.278129	0.381	0.254	8.18907e-28
Gch1	5.19565e-32	0.28772	0.53	0.398	9.31061e-28
Ywhah	5.25957e-32	0.271218	0.651	0.527	9.42515e-28
Thra	6.55993e-32	-0.339136	0.434	0.522	1.17554e-27
Kctd12	7.05225e-32	0.372403	0.541	0.431	1.26376e-27
Rps19	8.41567e-32	0.158174	0.993	0.99	1.50809e-27
Mall	1.38978e-31	0.260732	0.178	0.089	2.49049e-27
Acsl3	2.10007e-31	-0.415054	0.23	0.322	3.76333e-27
Ccnd3	2.12802e-31	0.273921	0.475	0.347	3.81341e-27
Mtss1	2.20459e-31	-0.310411	0.232	0.333	3.95062e-27
Jade2	3.8459e-31	0.215302	0.155	0.071	6.89185e-27
Pecam1	4.18673e-31	0.218465	0.915	0.872	7.50263e-27
Ercc1	4.56709e-31	0.249299	0.211	0.113	8.18422e-27
Insr	4.94677e-31	0.266004	0.572	0.434	8.86462e-27
Itih5	5.70125e-31	0.270996	0.891	0.833	1.02166e-26
Rps27a	6.91665e-31	0.148868	0.995	0.994	1.23946e-26
Rpl8	8.14713e-31	0.156493	0.993	0.988	1.45997e-26
Prr5l	8.46644e-31	-0.309028	0.129	0.215	1.51719e-26
Rela	8.54875e-31	0.260217	0.329	0.21	1.53194e-26
Dnaja1	9.2614e-31	-0.261518	0.82	0.85	1.65964e-26
Ankrd46	1.09793e-30	0.245637	0.284	0.172	1.96748e-26
Sparc	1.33652e-30	0.216439	0.977	0.958	2.39504e-26
Sema7a	1.70681e-30	0.238588	0.804	0.701	3.0586e-26
Klhl6	2.14603e-30	-0.268909	0.096	0.175	3.84568e-26
Cav1	2.30199e-30	-0.357099	0.465	0.554	4.12516e-26
Tagln2	2.65781e-30	0.278701	0.75	0.646	4.76279e-26
Picalm	3.75685e-30	0.295222	0.619	0.505	6.73228e-26
Tmem140	3.81798e-30	0.280632	0.443	0.317	6.84183e-26
Stx12	4.12479e-30	0.257658	0.619	0.49	7.39163e-26
Castor1	4.75932e-30	0.27601	0.362	0.244	8.5287e-26
Eef1b2	5.11236e-30	0.214565	0.864	0.796	9.16136e-26
Rpl7a	7.75317e-30	0.221896	0.881	0.808	1.38937e-25
Txn2	1.14223e-29	0.268344	0.446	0.319	2.04687e-25
Btg2	1.22174e-29	-0.39911	0.873	0.884	2.18936e-25
Alas1	1.26579e-29	0.29638	0.734	0.624	2.26829e-25
Cenpb	1.36283e-29	0.272189	0.543	0.414	2.44218e-25
Heg1	1.36694e-29	0.269511	0.634	0.517	2.44955e-25
Stard13	1.41267e-29	0.248571	0.288	0.178	2.5315e-25
Hipk3	1.46464e-29	0.256292	0.447	0.316	2.62464e-25
Ralbp1	1.6614e-29	0.264189	0.786	0.69	2.97722e-25
Msn	1.67054e-29	0.248235	0.75	0.646	2.99361e-25
Eif3h	1.97999e-29	0.249594	0.73	0.628	3.54814e-25
Gde1	2.20976e-29	0.266114	0.488	0.361	3.9599e-25
Nudcd3	2.2274e-29	-0.31126	0.384	0.478	3.9915e-25
Ap2b1	2.2458e-29	-0.296557	0.531	0.605	4.02447e-25
Actr3	2.72478e-29	0.27753	0.567	0.444	4.8828e-25
Aldh2	2.90969e-29	0.225075	0.854	0.774	5.21417e-25
Mt1	3.84995e-29	-0.32682	0.818	0.85	6.8991e-25
Rplp2	4.88502e-29	0.155671	0.979	0.972	8.75395e-25
Rpl11	8.28333e-29	0.152551	0.989	0.981	1.48437e-24
Unc45b	8.29339e-29	0.24755	0.322	0.209	1.48618e-24
Shroom2	9.66283e-29	0.216353	0.168	0.084	1.73158e-24
Crip1	1.07218e-28	-0.36695	0.572	0.648	1.92134e-24
Foxq1	1.41373e-28	-0.302802	0.783	0.839	2.5334e-24
Rpl21	1.49635e-28	0.156914	0.994	0.993	2.68146e-24
Rps28	1.62688e-28	-0.191227	0.958	0.978	2.91536e-24
AY036118	1.6906e-28	0.266672	0.886	0.83	3.02956e-24
Rpl18a	1.9993e-28	0.157457	0.995	0.994	3.58275e-24
Cd83	2.00959e-28	-0.248718	0.063	0.129	3.60119e-24
Hipk1	2.18612e-28	0.280245	0.455	0.337	3.91753e-24
Calcrl	2.34783e-28	-0.339834	0.27	0.363	4.20731e-24
Cdk5rap1	3.24629e-28	-0.152988	0.014	0.054	5.81736e-24
Bcl2	3.31457e-28	0.231697	0.176	0.091	5.93971e-24
Cracr2b	3.76441e-28	0.25983	0.584	0.457	6.74581e-24
2810029C07Rik	4.0629e-28	0.16786	0.072	0.019	7.28071e-24
Notum	4.84231e-28	-0.301998	0.171	0.26	8.67743e-24
Gja1	5.43598e-28	0.281733	0.295	0.19	9.74128e-24
Lrp8	6.20171e-28	0.272809	0.657	0.55	1.11135e-23
Dennd3	8.46382e-28	0.255334	0.315	0.206	1.51672e-23
Notch4	8.58444e-28	0.255815	0.348	0.233	1.53833e-23
Rpl19	9.87068e-28	0.138138	0.996	0.994	1.76883e-23
Hnrnpf	1.08716e-27	0.210312	0.86	0.781	1.94819e-23
Ndufb1-ps	2.30136e-27	-0.245676	0.646	0.712	4.12403e-23
Arl4d	2.43385e-27	0.275781	0.412	0.293	4.36146e-23
Tbc1d14	2.56247e-27	0.24499	0.34	0.225	4.59195e-23
H1f0	2.72488e-27	-0.344309	0.236	0.328	4.88299e-23
Rpl27	2.8208e-27	0.156987	0.985	0.979	5.05488e-23
Dgkh	3.5612e-27	0.255137	0.332	0.221	6.38167e-23
Hs3st1	6.05923e-27	-0.274124	0.103	0.179	1.08581e-22
Adgrl3	6.21512e-27	0.254948	0.247	0.15	1.11375e-22
Palmd	7.00644e-27	0.210091	0.921	0.863	1.25555e-22
Cnot6l	7.73326e-27	0.263821	0.649	0.539	1.3858e-22
Zfp52	1.34806e-26	0.204609	0.148	0.072	2.41572e-22
Csrnp1	1.75449e-26	0.228479	0.226	0.133	3.14405e-22
Anp32a	1.95841e-26	-0.259109	0.712	0.746	3.50948e-22
Fam181b	2.30648e-26	-0.225563	0.043	0.099	4.13321e-22
Ppp1cc	2.80785e-26	0.245355	0.441	0.32	5.03167e-22
Stk38	3.2718e-26	-0.321857	0.391	0.474	5.86307e-22
Cerk	3.48568e-26	0.172943	0.12	0.052	6.24634e-22
Slco2b1	3.63182e-26	0.251146	0.513	0.391	6.50823e-22
Kank3	5.25551e-26	0.210259	0.881	0.816	9.41788e-22
Runx1t1	5.90064e-26	-0.178638	0.016	0.056	1.05739e-21
Prdm16	6.19871e-26	-0.349241	0.161	0.242	1.11081e-21
Gm11730	6.45772e-26	0.134739	0.057	0.013	1.15722e-21
Efr3b	6.91594e-26	-0.312843	0.335	0.423	1.23934e-21
Cbx1	7.4429e-26	-0.292054	0.481	0.558	1.33377e-21
Cebpg	7.66321e-26	0.240458	0.471	0.351	1.37325e-21
1810037I17Rik	9.93337e-26	-0.233012	0.813	0.849	1.78006e-21
Lpin1	1.07717e-25	0.215027	0.133	0.063	1.93028e-21
Mindy1	1.09689e-25	-0.310285	0.49	0.559	1.96564e-21
Nr4a1	1.39292e-25	-0.475777	0.34	0.418	2.49612e-21
Igfbp7	1.84953e-25	0.162589	0.995	0.989	3.31437e-21
Pdlim5	1.87879e-25	0.273813	0.488	0.37	3.36679e-21
Trim16	2.03707e-25	0.249675	0.347	0.239	3.65042e-21
Trp53inp2	2.05001e-25	0.194064	0.169	0.089	3.67362e-21
Arpc2	2.45752e-25	0.197384	0.854	0.784	4.40388e-21
Knop1	3.03986e-25	-0.357701	0.288	0.37	5.44742e-21
Spred2	3.31179e-25	0.235275	0.289	0.188	5.93472e-21
Zfp771	3.5257e-25	-0.289831	0.218	0.305	6.31805e-21
Calr	4.30066e-25	0.232809	0.606	0.49	7.70678e-21
Eef1g	4.36443e-25	0.237114	0.654	0.539	7.82105e-21
Upf2	4.46241e-25	-0.302068	0.262	0.351	7.99664e-21
Snx10	5.5499e-25	-0.208931	0.05	0.107	9.94542e-21
Eif4ebp1	6.0282e-25	0.208282	0.182	0.101	1.08025e-20
Plscr1	8.95941e-25	-0.23245	0.065	0.127	1.60553e-20
Xpnpep1	9.03664e-25	0.201942	0.219	0.13	1.61937e-20
Spry1	9.0585e-25	0.236552	0.458	0.341	1.62328e-20
Fcho2	9.45991e-25	-0.279041	0.578	0.643	1.69522e-20
Pxn	1.09311e-24	0.223415	0.325	0.217	1.95885e-20
Gdi2	1.30618e-24	0.229271	0.628	0.511	2.34068e-20
Rps15a	1.40973e-24	0.131362	0.994	0.992	2.52624e-20
Gm42418	1.68637e-24	0.379531	1	1	3.02197e-20
Pde7b	1.77325e-24	0.190999	0.139	0.068	3.17767e-20
Ubl3	1.8066e-24	0.231318	0.708	0.609	3.23742e-20
Dipk1a	1.81292e-24	-0.28166	0.194	0.279	3.24875e-20
St5	2.10754e-24	-0.206969	0.058	0.117	3.77671e-20
Rpl29	3.15599e-24	0.162262	0.969	0.948	5.65554e-20
Hmgcl	3.38334e-24	0.201833	0.249	0.154	6.06294e-20
Elk3	3.80142e-24	-0.279863	0.507	0.574	6.81214e-20
Rapgef1	4.8896e-24	0.211259	0.268	0.172	8.76216e-20
Rpl10	5.50428e-24	0.176408	0.949	0.914	9.86368e-20
Polr2e	9.05344e-24	-0.298516	0.359	0.439	1.62238e-19
Arhgef7	9.50664e-24	0.195155	0.203	0.119	1.70359e-19
Tmod3	1.18155e-23	0.224331	0.734	0.636	2.11733e-19
Ablim1	1.4614e-23	-0.196515	0.922	0.94	2.61883e-19
Egln1	1.52227e-23	0.236112	0.521	0.406	2.72791e-19
Rapgef3	1.55727e-23	0.233524	0.31	0.208	2.79062e-19
9930111J21Rik2	1.61218e-23	-0.316462	0.263	0.348	2.88903e-19
Nop53	1.66617e-23	0.210139	0.396	0.283	2.98578e-19
Rhob	1.74281e-23	-0.288944	0.913	0.92	3.12312e-19
Hmgn5	1.76324e-23	0.257596	0.25	0.16	3.15973e-19
Wdr1	1.88046e-23	0.210144	0.331	0.226	3.36978e-19
Enc1	1.93433e-23	0.253098	0.406	0.294	3.46631e-19
Usp53	1.94104e-23	-0.298049	0.259	0.34	3.47835e-19
Mindy2	2.52412e-23	0.235601	0.551	0.439	4.52322e-19
4430402I18Rik	3.38136e-23	0.258964	0.362	0.256	6.05939e-19
Slc38a5	3.40167e-23	0.262041	0.355	0.249	6.09579e-19
Ppp1r18	3.50748e-23	0.193459	0.211	0.126	6.28541e-19
Anxa3	3.97388e-23	0.179956	0.913	0.853	7.12119e-19
Mfng	3.97871e-23	0.227121	0.406	0.295	7.12984e-19
Hist1h4d	4.95955e-23	0.212306	0.277	0.181	8.88751e-19
Rps17	5.51335e-23	0.164203	0.934	0.899	9.87993e-19
Glcci1	5.74731e-23	-0.297904	0.124	0.195	1.02992e-18
Sema6b	5.77635e-23	0.17232	0.133	0.066	1.03512e-18
Sox18	6.52095e-23	-0.235287	0.63	0.698	1.16855e-18
Fmo2	7.05066e-23	0.323095	0.496	0.39	1.26348e-18
Rin3	7.58276e-23	0.1981	0.234	0.145	1.35883e-18
Plekhh2	7.99118e-23	-0.322753	0.249	0.33	1.43202e-18
Adgrf5	8.39128e-23	0.165544	0.973	0.949	1.50372e-18
Amotl2	8.40601e-23	-0.293713	0.216	0.297	1.50636e-18
Mkrn1	1.00363e-22	0.237569	0.332	0.231	1.7985e-18
Clk1	1.00699e-22	-0.288074	0.582	0.634	1.80452e-18
Ifrd1	1.03078e-22	0.239436	0.343	0.242	1.84716e-18
Atp5b	1.22266e-22	0.185524	0.822	0.737	2.191e-18
Wwc2	1.23134e-22	0.219615	0.647	0.546	2.20657e-18
Slc26a10	1.31107e-22	-0.243087	0.028	0.071	2.34943e-18
Klf13	1.31836e-22	0.217839	0.806	0.733	2.36249e-18
Egln2	1.34881e-22	0.222525	0.34	0.237	2.41706e-18
Arap2	1.42518e-22	-0.295665	0.483	0.553	2.55392e-18
Fry	1.49034e-22	0.208965	0.824	0.736	2.67069e-18
Rbm3	1.79261e-22	0.21166	0.735	0.635	3.21235e-18
St13	2.253e-22	-0.264562	0.551	0.613	4.03738e-18
Nova2	2.5092e-22	0.201192	0.342	0.237	4.49649e-18
Smtn	2.89922e-22	0.214998	0.329	0.227	5.1954e-18
Tspan4	4.18664e-22	0.203234	0.284	0.189	7.50245e-18
Tiparp	4.23296e-22	0.218379	0.185	0.108	7.58546e-18
Srgn	4.27551e-22	0.163498	0.963	0.935	7.66172e-18
Arid5a	6.37869e-22	0.178569	0.154	0.084	1.14306e-17
Abcc4	9.06861e-22	0.235551	0.604	0.494	1.6251e-17
Slc7a5	9.18997e-22	0.172369	0.948	0.907	1.64684e-17
Aqp11	9.75463e-22	0.254026	0.562	0.461	1.74803e-17
Ppm1f	1.03379e-21	0.181656	0.236	0.148	1.85255e-17
Ptprr	1.04647e-21	0.313624	0.556	0.462	1.87528e-17
Atp2a2	1.05765e-21	0.230666	0.507	0.391	1.89531e-17
Nr1d2	1.34475e-21	0.173098	0.163	0.09	2.40979e-17
Srarp	1.55633e-21	-0.259149	0.532	0.601	2.78895e-17
Atf3	1.715e-21	-0.737972	0.344	0.415	3.07328e-17
Syn3	2.18219e-21	0.193868	0.174	0.1	3.91049e-17
Zbtb38	2.38066e-21	0.240208	0.449	0.345	4.26614e-17
Tra2a	2.77054e-21	-0.270668	0.377	0.453	4.96481e-17
Arl2bp	3.35027e-21	0.216487	0.693	0.588	6.00369e-17
Wee1	3.65112e-21	0.135232	0.096	0.042	6.54281e-17
Lgalsl	4.0643e-21	0.215997	0.341	0.24	7.28323e-17
Ebf1	4.09836e-21	-0.267165	0.643	0.697	7.34426e-17
Plscr2	4.26266e-21	-0.285234	0.115	0.181	7.63869e-17
Hells	4.5482e-21	-0.161911	0.023	0.062	8.15038e-17
Gfod1	4.82275e-21	0.180134	0.162	0.091	8.64237e-17
Krtap28-13	4.89835e-21	-0.193159	0.016	0.051	8.77784e-17
Edn1	4.97894e-21	-0.474789	0.256	0.342	8.92226e-17
Rsrc2	5.56765e-21	-0.258228	0.587	0.644	9.97723e-17
St6galnac2	5.95678e-21	0.238961	0.5	0.394	1.06746e-16
Snrnp27	5.99246e-21	-0.287946	0.402	0.473	1.07385e-16
Ncoa4	6.5573e-21	-0.29418	0.288	0.361	1.17507e-16
Trib1	7.27267e-21	0.185137	0.148	0.08	1.30326e-16
Coro1c	7.56736e-21	0.154144	0.192	0.114	1.35607e-16
Bach1	8.63633e-21	0.226716	0.36	0.261	1.54763e-16
Sdc3	9.29623e-21	0.210224	0.37	0.267	1.66589e-16
Msx1	9.4398e-21	-0.172852	0.03	0.072	1.69161e-16
Vat1	1.11159e-20	0.228682	0.529	0.42	1.99196e-16
Dph3	1.1317e-20	0.201965	0.419	0.309	2.028e-16
Ercc5	1.61438e-20	0.193236	0.22	0.139	2.89297e-16
Eno1	1.78197e-20	-0.279668	0.339	0.418	3.19329e-16
Cd81	1.94073e-20	0.175615	0.903	0.853	3.47779e-16
Sec61g	2.06894e-20	-0.224575	0.718	0.753	3.70754e-16
Phc1	2.10719e-20	0.18398	0.192	0.115	3.77609e-16
H2-D1	2.20138e-20	0.16924	0.972	0.948	3.94488e-16
Ubb	2.26491e-20	-0.109695	0.998	0.999	4.05873e-16
Serpine2	2.41685e-20	0.232046	0.163	0.094	4.331e-16
Rpl30	2.42184e-20	0.117104	0.996	0.997	4.33993e-16
Atp7a	2.50549e-20	0.171797	0.164	0.093	4.48984e-16
Slc39a8	3.30425e-20	0.225818	0.513	0.404	5.92122e-16
Tnrc6a	3.34382e-20	-0.254454	0.329	0.404	5.99212e-16
Tmed5	3.69426e-20	0.222267	0.546	0.436	6.62011e-16
Sorbs1	3.92584e-20	0.242084	0.518	0.418	7.0351e-16
Bnip2	4.27129e-20	0.195313	0.785	0.705	7.65415e-16
Rai14	4.35439e-20	0.221287	0.395	0.294	7.80307e-16
Schip1	4.94064e-20	0.132099	0.097	0.044	8.85362e-16
Endog	5.26061e-20	0.173777	0.152	0.085	9.42701e-16
Taf1d	5.3152e-20	-0.257491	0.219	0.295	9.52483e-16
Dusp3	5.55633e-20	0.193436	0.728	0.636	9.95695e-16
Utrn	6.98435e-20	0.179865	0.918	0.878	1.25159e-15
Fxr1	7.41376e-20	-0.24237	0.474	0.543	1.32855e-15
Capns1	7.52055e-20	0.19519	0.728	0.634	1.34768e-15
Rps10	7.77081e-20	0.119028	0.992	0.989	1.39253e-15
Flt4	7.85432e-20	0.188629	0.336	0.238	1.40749e-15
Ntm	1.04252e-19	-0.266227	0.118	0.182	1.8682e-15
Phactr1	1.29282e-19	0.237278	0.344	0.252	2.31673e-15
Cdk19	1.30637e-19	-0.300953	0.173	0.242	2.34101e-15
P4ha2	1.33716e-19	0.160914	0.132	0.07	2.39618e-15
Eif3f	1.44915e-19	0.187716	0.823	0.759	2.59687e-15
Ankrd37	1.56882e-19	-0.301429	0.138	0.207	2.81133e-15
Rgs3	1.603e-19	-0.250474	0.181	0.254	2.87258e-15
Hdac7	2.08374e-19	-0.283536	0.305	0.374	3.73407e-15
Pla2g6	2.20276e-19	0.123889	0.085	0.036	3.94734e-15
Ehd4	3.11735e-19	0.188452	0.352	0.252	5.58629e-15
Tnfsf10	3.14193e-19	-0.282455	0.251	0.325	5.63033e-15
Dlgap4	3.20725e-19	0.181907	0.205	0.128	5.7474e-15
Atxn3	3.6373e-19	0.17218	0.187	0.114	6.51804e-15
Cnn3	3.96688e-19	0.203431	0.398	0.294	7.10866e-15
Eftud2	4.01831e-19	0.181121	0.394	0.291	7.20081e-15
Rpl34	4.50722e-19	0.113062	0.994	0.995	8.07693e-15
Rps2	4.78354e-19	0.121884	0.98	0.971	8.57211e-15
Rapgef6	4.83388e-19	0.205954	0.445	0.342	8.66231e-15
Vstm2b	5.15061e-19	0.196046	0.14	0.077	9.2299e-15
Zdhhc20	5.39652e-19	0.207089	0.332	0.238	9.67056e-15
Jup	5.47667e-19	-0.251418	0.385	0.455	9.81419e-15
Tbc1d4	5.95816e-19	0.226765	0.499	0.397	1.0677e-14
Rpl15	7.11815e-19	0.119392	0.984	0.985	1.27557e-14
Depp1	7.17976e-19	0.227062	0.354	0.259	1.28661e-14
Tns2	7.35736e-19	0.178466	0.361	0.263	1.31844e-14
Gas6	7.88335e-19	0.214397	0.481	0.379	1.4127e-14
Mark3	8.30785e-19	0.200312	0.438	0.333	1.48877e-14
Hist1h1e	8.69324e-19	0.24451	0.227	0.149	1.55783e-14
Kdm6b	1.05288e-18	0.194964	0.209	0.133	1.88677e-14
Vasp	1.09534e-18	0.196156	0.344	0.248	1.96285e-14
Cyb5a	1.09796e-18	-0.241375	0.515	0.572	1.96755e-14
Nus1	1.50208e-18	0.204354	0.279	0.193	2.69172e-14
Ivns1abp	1.597e-18	0.291778	0.594	0.506	2.86182e-14
Rps24	1.68507e-18	0.108223	0.998	0.998	3.01965e-14
Tprgl	1.72003e-18	0.182585	0.709	0.615	3.08229e-14
Dusp16	1.99814e-18	0.165138	0.143	0.081	3.58067e-14
Def6	2.13426e-18	0.179324	0.225	0.147	3.82459e-14
Sptan1	2.4019e-18	0.192603	0.818	0.748	4.3042e-14
Pdcd6	2.57947e-18	0.176191	0.438	0.33	4.62241e-14
Rasgrp2	2.63731e-18	0.227006	0.528	0.425	4.72605e-14
Epha4	2.78195e-18	-0.247732	0.231	0.305	4.98525e-14
Ypel3	4.09989e-18	-0.251115	0.388	0.455	7.347e-14
Eif4b	4.17178e-18	0.196272	0.361	0.265	7.47582e-14
Rassf9	5.30677e-18	-0.23488	0.305	0.377	9.50972e-14
Lpin2	5.51961e-18	0.199356	0.178	0.111	9.89115e-14
Tdrp	5.77851e-18	-0.250041	0.516	0.575	1.03551e-13
Prnp	8.07881e-18	0.192577	0.717	0.628	1.44772e-13
Ktn1	8.86873e-18	-0.217964	0.654	0.695	1.58928e-13
Nr1h2	1.00144e-17	0.166316	0.253	0.17	1.79458e-13
Per1	1.01763e-17	0.18208	0.276	0.193	1.8236e-13
Zbtb8a	1.02796e-17	0.133627	0.111	0.057	1.84211e-13
Map3k1	1.09123e-17	-0.251187	0.316	0.388	1.95548e-13
Polr2l	1.09203e-17	-0.202048	0.093	0.149	1.95691e-13
Mob2	1.10608e-17	0.168131	0.32	0.227	1.98209e-13
Tmem59	1.16071e-17	0.164001	0.867	0.819	2.07999e-13
Slc7a1	1.23792e-17	-0.304597	0.754	0.769	2.21835e-13
Tmem192	1.44155e-17	0.144309	0.11	0.057	2.58326e-13
Peli1	1.56182e-17	-0.267968	0.393	0.455	2.79878e-13
Osmr	1.56917e-17	0.200788	0.299	0.213	2.81195e-13
Cav2	1.59852e-17	-0.218003	0.684	0.713	2.86455e-13
Smarca2	1.75455e-17	0.220244	0.622	0.525	3.14416e-13
Tbc1d10a	1.83696e-17	0.162013	0.202	0.128	3.29184e-13
Gbp7	1.91484e-17	-0.29778	0.358	0.423	3.43138e-13
Gm15270	2.03573e-17	0.156994	0.126	0.069	3.64804e-13
Rnf19a	2.1135e-17	0.182602	0.315	0.226	3.78739e-13
Tmem50a	2.33137e-17	0.179715	0.776	0.695	4.17782e-13
Clic5	2.42042e-17	-0.20536	0.77	0.79	4.3374e-13
Etf1	2.42565e-17	0.170929	0.269	0.185	4.34676e-13
Gm11827	2.67554e-17	0.0972497	0.047	0.014	4.79457e-13
Irf2bpl	2.70283e-17	0.189875	0.636	0.536	4.84346e-13
Rassf1	2.75157e-17	0.195859	0.48	0.376	4.93081e-13
Htr2a	2.75193e-17	0.100022	0.062	0.023	4.93146e-13
Rpl9	3.04071e-17	0.105832	0.997	0.996	5.44895e-13
Mpp2	3.08755e-17	0.0980113	0.053	0.017	5.53289e-13
Pwwp3a	3.20052e-17	-0.241317	0.206	0.274	5.73533e-13
Triobp	4.59755e-17	0.196773	0.313	0.227	8.2388e-13
Wwtr1	4.65026e-17	0.183532	0.679	0.587	8.33327e-13
Alox12	4.6945e-17	-0.0986578	0.01	0.035	8.41255e-13
1110004F10Rik	4.93202e-17	-0.2127	0.485	0.543	8.83818e-13
Rpl18	5.15231e-17	0.127549	0.983	0.973	9.23293e-13
Agfg1	5.35419e-17	-0.229516	0.484	0.543	9.59472e-13
Serinc1	5.55812e-17	0.182731	0.59	0.486	9.96015e-13
Ncaph	6.60948e-17	0.129958	0.097	0.048	1.18442e-12
Dip2b	8.03703e-17	-0.259376	0.329	0.395	1.44024e-12
Icam2	8.30261e-17	0.176047	0.695	0.604	1.48783e-12
Rpsa	8.35171e-17	0.123441	0.964	0.946	1.49663e-12
Ssr3	8.47814e-17	0.173525	0.457	0.357	1.51928e-12
Elovl7	8.62378e-17	0.180905	0.612	0.508	1.54538e-12
Tacc2	9.01598e-17	0.153472	0.142	0.082	1.61566e-12
Phactr4	9.12417e-17	-0.257679	0.445	0.506	1.63505e-12
Foxf1	9.75086e-17	0.18892	0.28	0.196	1.74735e-12
Adam10	9.95558e-17	-0.222386	0.522	0.574	1.78404e-12
Anxa7	1.11665e-16	0.177593	0.446	0.345	2.00104e-12
Samd9l	1.14768e-16	-0.23491	0.215	0.283	2.05663e-12
Rasd1	1.15355e-16	0.307594	0.328	0.245	2.06717e-12
Id2	1.19004e-16	-0.306239	0.182	0.246	2.13255e-12
Camk2n1	1.21068e-16	0.191256	0.525	0.422	2.16954e-12
Slco1a4	1.23451e-16	-0.118324	0.993	0.992	2.21224e-12
Cdc14a	1.31622e-16	0.174084	0.248	0.169	2.35867e-12
Tbkbp1	1.44212e-16	0.149106	0.225	0.15	2.58427e-12
Nomo1	1.97118e-16	0.176787	0.33	0.241	3.53235e-12
Rgs16	2.07969e-16	-0.126055	0.015	0.043	3.72681e-12
Sat1	2.15487e-16	0.161098	0.596	0.5	3.86152e-12
Gng11	2.24492e-16	-0.14811	0.931	0.942	4.0229e-12
Acot9	2.27207e-16	0.144841	0.227	0.152	4.07155e-12
Lcn2	2.36386e-16	0.107222	0.043	0.012	4.23603e-12
Gm11808	2.41459e-16	-0.242945	0.372	0.431	4.32695e-12
Retreg1	2.44722e-16	0.21214	0.228	0.155	4.38542e-12
Irf2bp2	2.6093e-16	0.171633	0.548	0.45	4.67586e-12
Lrrc49	2.78892e-16	-0.235283	0.19	0.255	4.99775e-12
Phc2	3.23741e-16	0.173575	0.387	0.294	5.80143e-12
Cds2	3.4281e-16	0.195788	0.305	0.222	6.14315e-12
Cnot3	3.77492e-16	-0.226448	0.265	0.333	6.76466e-12
Ppard	3.88518e-16	0.149628	0.313	0.226	6.96225e-12
Timm10b	3.90964e-16	-0.256565	0.371	0.434	7.00608e-12
N4bp3	4.2789e-16	0.180785	0.37	0.28	7.66779e-12
Tgm2	4.50749e-16	0.175794	0.382	0.29	8.07741e-12
Rbp1	4.94972e-16	0.253868	0.28	0.203	8.86991e-12
1810026B05Rik	4.97031e-16	-0.238801	0.414	0.47	8.90679e-12
Purb	5.13057e-16	0.184932	0.727	0.653	9.19398e-12
Rpl31	5.38235e-16	0.141949	0.912	0.872	9.64517e-12
Gnai3	6.02573e-16	0.168426	0.364	0.272	1.07981e-11
Gdpd5	6.15733e-16	0.131449	0.137	0.08	1.10339e-11
Snx13	6.39345e-16	0.157696	0.277	0.195	1.14571e-11
Cd151	6.63881e-16	0.170186	0.659	0.56	1.18967e-11
Aplp2	6.96177e-16	0.141624	0.905	0.852	1.24755e-11
Lao1	8.29908e-16	0.0625916	0.027	0.004	1.4872e-11
Iigp1	8.65686e-16	-0.289853	0.205	0.27	1.55131e-11
Nfkbil1	8.73848e-16	0.141312	0.161	0.099	1.56594e-11
Arhgap25	1.01059e-15	0.140379	0.135	0.079	1.81097e-11
Slc31a2	1.28355e-15	0.168101	0.276	0.197	2.30012e-11
Smco4	1.49368e-15	-0.228142	0.473	0.527	2.67668e-11
Lrrc58	1.6037e-15	0.179403	0.494	0.4	2.87383e-11
Jcad	1.64549e-15	-0.158845	0.903	0.918	2.94873e-11
Sgk1	1.77312e-15	0.164062	0.669	0.573	3.17743e-11
4833403J16Rik	1.82694e-15	0.113518	0.1	0.052	3.27388e-11
Sox9	1.88621e-15	-0.12512	0.022	0.054	3.38009e-11
Nxn	2.04683e-15	0.185305	0.523	0.427	3.66791e-11
Tomm7	2.09687e-15	-0.1578	0.825	0.84	3.75759e-11
Dusp7	2.10884e-15	-0.226739	0.269	0.333	3.77905e-11
Palm	2.16645e-15	-0.226591	0.477	0.529	3.88228e-11
Rora	2.19986e-15	0.173044	0.415	0.323	3.94214e-11
Exosc7	2.25932e-15	-0.215143	0.145	0.205	4.0487e-11
Tubb6	2.66642e-15	0.0877794	0.044	0.014	4.77823e-11
Dusp6	2.82157e-15	0.203492	0.538	0.439	5.05625e-11
Ssr2	2.82831e-15	0.149027	0.441	0.341	5.06834e-11
Rarg	3.19998e-15	-0.193432	0.097	0.149	5.73436e-11
Frmd6	3.23924e-15	-0.151201	0.034	0.07	5.80472e-11
Irf8	3.29348e-15	0.0640728	0.022	0.002	5.90192e-11
mt-Nd4	3.79528e-15	0.112145	0.99	0.984	6.80114e-11
Csrp1	4.06831e-15	0.176367	0.367	0.278	7.29041e-11
3222401L13Rik	4.59066e-15	-0.2374	0.128	0.185	8.22647e-11
Rabac1	4.72702e-15	0.140443	0.877	0.817	8.47082e-11
Ctsh	5.99566e-15	0.183437	0.789	0.72	1.07442e-10
Crk	6.2023e-15	0.186471	0.41	0.322	1.11145e-10
Ube2b	6.42335e-15	0.157897	0.69	0.599	1.15106e-10
Bmx	6.64836e-15	-0.13144	0.014	0.04	1.19139e-10
Sh3bgrl	7.17008e-15	0.188005	0.716	0.634	1.28488e-10
Eif5	7.59528e-15	0.173596	0.641	0.553	1.36107e-10
Tril	7.90228e-15	-0.256805	0.21	0.269	1.41609e-10
Nrep	9.44605e-15	-0.194378	0.089	0.139	1.69273e-10
Lima1	9.85826e-15	-0.216208	0.421	0.482	1.7666e-10
Pnrc1	1.00922e-14	-0.227577	0.704	0.715	1.80851e-10
Pfdn5	1.02802e-14	0.133929	0.925	0.896	1.8422e-10
Mef2c	1.03582e-14	-0.227987	0.461	0.512	1.85619e-10
Calm2	1.13768e-14	-0.186924	0.733	0.759	2.03872e-10
Tnfaip8l1	1.26801e-14	0.117433	0.106	0.058	2.27227e-10
Ifnar2	1.76127e-14	-0.197291	0.729	0.746	3.1562e-10
Crnkl1	1.80442e-14	-0.205948	0.128	0.182	3.23353e-10
Epha2	1.90329e-14	0.108471	0.083	0.041	3.41069e-10
Wnk1	1.90339e-14	0.178706	0.549	0.455	3.41087e-10
Eif3g	2.09505e-14	0.175306	0.39	0.302	3.75433e-10
H2-K1	2.10686e-14	0.19206	0.835	0.772	3.7755e-10
Hbb-bs	2.24288e-14	-1.92418	0.022	0.053	4.01924e-10
Smox	2.30173e-14	0.170786	0.433	0.341	4.12469e-10
mt-Nd4l	2.4053e-14	-0.178546	0.711	0.757	4.31029e-10
Rasgrp3	2.43523e-14	-0.220193	0.619	0.654	4.36394e-10
Ttyh2	2.4713e-14	-0.250873	0.217	0.277	4.42858e-10
Tbx1	2.51223e-14	0.129362	0.184	0.119	4.50191e-10
Sar1a	2.76448e-14	0.14858	0.368	0.28	4.95395e-10
Nog	2.87866e-14	-0.0966662	0.007	0.027	5.15856e-10
Kif23	2.9545e-14	0.111949	0.109	0.061	5.29447e-10
Lrrc32	3.09925e-14	0.0940407	0.045	0.015	5.55385e-10
Luc7l3	3.38687e-14	-0.229292	0.298	0.36	6.06927e-10
Tmco1	3.60806e-14	-0.196684	0.644	0.676	6.46563e-10
Pde4d	3.88333e-14	0.100861	0.063	0.027	6.95893e-10
Mcl1	3.97843e-14	0.15292	0.826	0.771	7.12935e-10
Trak2	4.13705e-14	0.130465	0.184	0.122	7.41359e-10
Capzb	4.21404e-14	0.147257	0.54	0.444	7.55156e-10
Crlf2	4.23989e-14	0.136041	0.202	0.136	7.59788e-10
Stx3	4.37832e-14	0.157047	0.414	0.325	7.84595e-10
Mafk	4.98711e-14	0.128199	0.184	0.121	8.93689e-10
Akap13	5.2059e-14	0.184174	0.571	0.483	9.32897e-10
Cct2	5.95658e-14	0.152254	0.476	0.385	1.06742e-09
Polk	6.35042e-14	-0.215267	0.522	0.573	1.13799e-09
Shroom1	6.56013e-14	0.136338	0.233	0.164	1.17558e-09
Bmyc	6.6889e-14	-0.21096	0.188	0.246	1.19865e-09
Zfp442	6.92311e-14	-0.117527	0.024	0.054	1.24062e-09
Foxo3	8.17678e-14	0.136354	0.157	0.101	1.46528e-09
Cwf19l2	8.45563e-14	-0.230254	0.239	0.301	1.51525e-09
Lsm2	9.75273e-14	0.148587	0.296	0.22	1.74769e-09
Parvb	9.88442e-14	0.177858	0.695	0.61	1.77129e-09
Nucb1	1.0079e-13	0.157647	0.425	0.33	1.80615e-09
Ctsl	1.28176e-13	0.175704	0.742	0.66	2.29691e-09
Tec	1.30374e-13	-0.146557	0.036	0.071	2.33631e-09
Bag1	1.32466e-13	0.154693	0.509	0.415	2.37379e-09
Tmbim6	1.35559e-13	0.142544	0.853	0.807	2.42922e-09
Tbc1d15	1.81453e-13	0.145512	0.325	0.244	3.25163e-09
Ptpn14	2.10558e-13	0.13453	0.188	0.127	3.7732e-09
Eif2b3	2.36922e-13	-0.1592	0.059	0.1	4.24565e-09
mt-Nd5	2.46289e-13	0.152042	0.76	0.682	4.41351e-09
Fgfr1	2.5179e-13	0.093806	0.092	0.049	4.51208e-09
Gbp5	2.54126e-13	-0.222048	0.194	0.252	4.55394e-09
Hint1	2.75824e-13	0.143208	0.896	0.849	4.94277e-09
Swap70	2.90381e-13	0.170912	0.462	0.374	5.20362e-09
Nes	2.95125e-13	0.215082	0.651	0.59	5.28864e-09
Xpo1	3.04554e-13	-0.187604	0.106	0.156	5.45761e-09
App	3.3425e-13	0.105454	0.989	0.981	5.98976e-09
Osbpl1a	3.61476e-13	-0.204723	0.586	0.626	6.47765e-09
Gltp	3.97999e-13	0.159472	0.391	0.303	7.13215e-09
Fth1	4.06792e-13	0.111296	0.99	0.989	7.28971e-09
Tra2b	4.0788e-13	-0.212318	0.523	0.567	7.30922e-09
Rbbp8	4.20732e-13	0.116964	0.121	0.072	7.53952e-09
Prkd2	4.63284e-13	0.130375	0.213	0.148	8.30206e-09
Jdp2	4.68893e-13	0.112447	0.128	0.078	8.40256e-09
Atf7ip	4.91095e-13	-0.23954	0.177	0.231	8.80041e-09
Mbd2	4.9863e-13	0.161816	0.511	0.426	8.93545e-09
Cflar	5.11121e-13	0.140501	0.339	0.257	9.15929e-09
4921524J17Rik	5.21759e-13	-0.223241	0.333	0.389	9.34993e-09
Milr1	5.23359e-13	-0.109403	0.02	0.047	9.37859e-09
Ndufaf7	5.34491e-13	0.153837	0.369	0.287	9.57808e-09
Susd6	5.47994e-13	-0.224513	0.327	0.381	9.82006e-09
Akt1	5.55025e-13	0.132427	0.313	0.234	9.94605e-09
Pcdh19	5.658e-13	0.159043	0.317	0.24	1.01391e-08
Myrip	5.95634e-13	0.114203	0.132	0.081	1.06738e-08
Cdkn2b	5.96113e-13	0.158075	0.43	0.342	1.06823e-08
Birc3	6.23819e-13	0.102036	0.097	0.054	1.11788e-08
Jarid2	7.2561e-13	-0.19909	0.13	0.182	1.30029e-08
Map4k4	7.60371e-13	0.157314	0.439	0.351	1.36258e-08
Rhoj	7.79246e-13	0.153689	0.425	0.341	1.39641e-08
Crim1	7.95638e-13	0.175757	0.453	0.368	1.42578e-08
Tceal9	8.50358e-13	0.298595	0.579	0.525	1.52384e-08
Cdc42ep4	8.52538e-13	0.14018	0.326	0.246	1.52775e-08
B3gnt2	8.57806e-13	-0.211317	0.632	0.665	1.53719e-08
Prkch	8.76809e-13	0.141533	0.373	0.292	1.57124e-08
Mier1	8.97036e-13	-0.200738	0.632	0.667	1.60749e-08
Mitd1	9.29646e-13	-0.240975	0.171	0.225	1.66593e-08
Hnrnpm	9.64722e-13	-0.20664	0.548	0.583	1.72878e-08
Col4a2	1.02093e-12	0.152177	0.664	0.585	1.82951e-08
Lmo7	1.02789e-12	-0.260013	0.184	0.236	1.84198e-08
Epn2	1.08715e-12	-0.216151	0.448	0.497	1.94816e-08
Egfl7	1.10833e-12	-0.131556	0.985	0.985	1.98612e-08
Fau	1.14861e-12	0.0857891	0.999	0.998	2.0583e-08
Irgm2	1.1835e-12	-0.154865	0.067	0.108	2.12083e-08
Atp6v0c	1.18498e-12	0.143306	0.778	0.699	2.12349e-08
Dennd5a	1.19698e-12	0.13892	0.392	0.307	2.14499e-08
Cdh5	1.27204e-12	-0.153482	0.852	0.874	2.27949e-08
Ccng2	1.35089e-12	0.120436	0.179	0.12	2.42079e-08
Pabpc1	1.35527e-12	-0.220999	0.618	0.645	2.42865e-08
Sorbs3	1.39473e-12	0.147821	0.34	0.261	2.49935e-08
Cst3	1.42503e-12	0.122704	0.989	0.98	2.55365e-08
Pop5	1.45696e-12	-0.205103	0.56	0.593	2.61087e-08
Cdc42bpa	1.45736e-12	0.14552	0.31	0.235	2.6116e-08
Stt3b	1.45874e-12	0.147628	0.239	0.172	2.61406e-08
Tjp1	1.51679e-12	-0.160482	0.858	0.861	2.71808e-08
Ankrd11	1.54015e-12	0.159246	0.586	0.496	2.75995e-08
Alpl	1.56359e-12	-0.286126	0.182	0.233	2.80195e-08
Ipmk	1.62885e-12	0.140761	0.211	0.149	2.91889e-08
Mt2	1.6786e-12	-0.201104	0.441	0.494	3.00804e-08
Mbd3	1.73811e-12	0.154707	0.411	0.327	3.1147e-08
Ly6a	1.74706e-12	0.108119	0.998	0.995	3.13073e-08
Pitpnb	1.75881e-12	0.130557	0.36	0.276	3.1518e-08
Eif3j1	1.79742e-12	-0.206163	0.371	0.419	3.22097e-08
Plscr4	1.8421e-12	-0.229569	0.358	0.407	3.30104e-08
Ahnak	2.19593e-12	0.148647	0.91	0.868	3.93511e-08
Nfe2l2	2.23886e-12	-0.223244	0.372	0.423	4.01204e-08
Rbx1	2.32244e-12	-0.152031	0.761	0.768	4.16181e-08
Crybg3	2.42214e-12	-0.200941	0.523	0.569	4.34048e-08
Lap3	2.62225e-12	0.122787	0.209	0.145	4.69908e-08
Dhx15	2.66861e-12	-0.210491	0.303	0.357	4.78215e-08
Bcl9l	2.9421e-12	-0.154265	0.059	0.097	5.27225e-08
Smim7	3.05684e-12	0.13091	0.334	0.257	5.47785e-08
Dazap2	3.06839e-12	0.130452	0.515	0.42	5.49856e-08
Itpr1	3.2287e-12	0.139019	0.179	0.122	5.78583e-08
Uap1	3.26494e-12	0.130116	0.23	0.165	5.85077e-08
Ergic1	3.28605e-12	0.109709	0.102	0.059	5.8886e-08
Epb41	3.30402e-12	0.142649	0.241	0.174	5.92081e-08
Cavin1	3.48643e-12	0.155399	0.677	0.595	6.24768e-08
Pnn	3.54009e-12	-0.211267	0.438	0.483	6.34385e-08
Ccni	3.54098e-12	0.1436	0.372	0.292	6.34544e-08
Tpm1	3.59775e-12	-0.185418	0.631	0.66	6.44717e-08
Arid5b	3.63581e-12	-0.182376	0.633	0.675	6.51537e-08
Tomm20	3.89193e-12	0.142577	0.535	0.443	6.97435e-08
Hmg20b	4.0004e-12	-0.231907	0.473	0.511	7.16871e-08
Notumos	4.19425e-12	-0.100362	0.023	0.05	7.51609e-08
Rbpj	4.37105e-12	-0.211246	0.219	0.273	7.83292e-08
Qsox1	4.58757e-12	0.128404	0.223	0.16	8.22093e-08
Ndufa7	4.70382e-12	0.13282	0.942	0.917	8.42925e-08
Pdcl3	4.76992e-12	0.155137	0.491	0.404	8.5477e-08
Gsk3b	5.04289e-12	-0.166671	0.63	0.667	9.03686e-08
Tubb2b	5.36926e-12	0.0817888	0.034	0.011	9.62172e-08
Skp1a	5.70716e-12	-0.208239	0.467	0.509	1.02272e-07
Trim34a	5.91312e-12	-0.176513	0.101	0.147	1.05963e-07
Yy1	5.96324e-12	0.16423	0.53	0.446	1.06861e-07
Nid1	6.02676e-12	0.130402	0.188	0.129	1.07999e-07
Nt5c2	6.1627e-12	0.13199	0.307	0.233	1.10436e-07
4930486L24Rik	6.33473e-12	0.112564	0.089	0.05	1.13518e-07
Stk17b	6.51998e-12	0.124994	0.158	0.104	1.16838e-07
Sec61b	6.93047e-12	-0.164641	0.563	0.597	1.24194e-07
Inpp5k	7.13626e-12	0.115598	0.239	0.174	1.27882e-07
Vangl2	7.42485e-12	-0.122938	0.04	0.073	1.33053e-07
Slc16a6	7.53763e-12	0.0850314	0.042	0.016	1.35074e-07
Mras	8.40788e-12	-0.13115	0.051	0.087	1.50669e-07
Rala	8.83723e-12	0.141641	0.533	0.449	1.58363e-07
AU021092	8.87954e-12	0.162475	0.545	0.46	1.59121e-07
Hnrnpa1	9.5315e-12	0.150142	0.468	0.381	1.70804e-07
Atp5h	9.54214e-12	0.119325	0.911	0.872	1.70995e-07
Arf1	9.88519e-12	0.118124	0.803	0.727	1.77143e-07
Pttg1	9.90729e-12	-0.196984	0.365	0.419	1.77539e-07
Car4	9.9856e-12	0.126394	0.933	0.86	1.78942e-07
Fam43a	1.00971e-11	0.145609	0.22	0.158	1.8094e-07
Smad7	1.11004e-11	-0.232305	0.513	0.547	1.9892e-07
Kcnj2	1.11078e-11	-0.115328	0.027	0.055	1.99051e-07
Rbms2	1.12441e-11	0.120159	0.216	0.154	2.01494e-07
Dst	1.12832e-11	0.160025	0.416	0.337	2.02195e-07
Ddx3y	1.19374e-11	-0.20311	0.156	0.209	2.13919e-07
Eif1a	1.34645e-11	0.124974	0.226	0.162	2.41285e-07
Ncoa7	1.45379e-11	-0.205289	0.121	0.168	2.60519e-07
Capg	1.51663e-11	0.133437	0.254	0.187	2.71781e-07
Nsd1	1.51918e-11	-0.209699	0.375	0.421	2.72238e-07
Tead1	1.57236e-11	0.132242	0.206	0.145	2.81766e-07
Scd2	1.61918e-11	-0.206543	0.149	0.199	2.90157e-07
H2afj	1.64602e-11	0.173831	0.424	0.343	2.94968e-07
Dusp11	1.66952e-11	-0.191659	0.623	0.655	2.99179e-07
Kansl3	1.71195e-11	0.117974	0.226	0.162	3.06781e-07
Vmp1	1.73073e-11	0.110325	0.264	0.195	3.10147e-07
Cbfa2t3	1.90116e-11	0.156377	0.455	0.376	3.40688e-07
Cdv3	1.97135e-11	0.139018	0.448	0.369	3.53266e-07
Nek6	2.00227e-11	0.0580616	0.029	0.008	3.58807e-07
Hspa9	2.00438e-11	0.128645	0.309	0.237	3.59185e-07
Eci2	2.0363e-11	0.131023	0.43	0.347	3.64904e-07
Ybx3	2.0423e-11	0.139072	0.661	0.587	3.6598e-07
Dcbld2	2.28719e-11	0.107916	0.105	0.063	4.09864e-07
Sort1	2.66637e-11	0.123517	0.263	0.194	4.77813e-07
Hbegf	2.83247e-11	-0.209666	0.207	0.261	5.07578e-07
Snrpf	2.88623e-11	-0.183713	0.487	0.525	5.17212e-07
Rhpn2	3.10082e-11	-0.0941485	0.017	0.041	5.55667e-07
Cited2	3.25126e-11	-0.229008	0.132	0.179	5.82626e-07
Pkm	3.67669e-11	0.146761	0.775	0.7	6.58863e-07
Nfkb2	3.79887e-11	0.0878335	0.087	0.049	6.80757e-07
Robo4	3.86795e-11	0.160984	0.614	0.535	6.93137e-07
Neat1	3.90995e-11	-0.239162	0.354	0.401	7.00664e-07
Mrpl54	4.05799e-11	0.113042	0.222	0.16	7.27192e-07
Eif2ak4	4.32478e-11	0.111513	0.124	0.079	7.75e-07
Ssbp1	5.12916e-11	-0.182302	0.21	0.262	9.19145e-07
Arhgap20	5.29483e-11	-0.0876403	0.016	0.038	9.48834e-07
Cnksr3	5.31994e-11	0.100228	0.096	0.057	9.53333e-07
Helz2	5.45452e-11	0.123642	0.179	0.125	9.7745e-07
Degs2	5.95108e-11	-0.204941	0.5	0.535	1.06643e-06
Afap1l1	6.45598e-11	0.132417	0.602	0.512	1.15691e-06
Rad21	6.59854e-11	0.128268	0.388	0.307	1.18246e-06
Kdm1a	6.60491e-11	-0.208702	0.268	0.317	1.1836e-06
Ddx50	6.6421e-11	0.140038	0.643	0.567	1.19026e-06
Pet100	6.68551e-11	-0.202272	0.307	0.354	1.19804e-06
Ost4	6.73778e-11	-0.17484	0.681	0.693	1.20741e-06
Lims1	6.80311e-11	-0.195834	0.36	0.408	1.21912e-06
Sdf4	6.82916e-11	0.138336	0.481	0.398	1.22379e-06
Smagp	6.94442e-11	0.148549	0.443	0.366	1.24444e-06
Pink1	6.98829e-11	0.143155	0.36	0.286	1.2523e-06
Tle1	7.19268e-11	0.137447	0.315	0.245	1.28893e-06
Spop	7.36622e-11	0.135742	0.572	0.486	1.32003e-06
Coro2b	7.95707e-11	0.121613	0.194	0.138	1.42591e-06
Ppp2r2d	7.96642e-11	0.155951	0.563	0.483	1.42758e-06
Hes1	8.04672e-11	-0.414572	0.731	0.742	1.44197e-06
Cab39	8.27138e-11	0.124077	0.364	0.285	1.48223e-06
Klf15	8.86196e-11	0.0542061	0.023	0.005	1.58806e-06
Mrtfb	9.41653e-11	-0.189503	0.48	0.522	1.68744e-06
2610001J05Rik	9.64955e-11	0.119193	0.344	0.267	1.7292e-06
Maoa	1.13006e-10	-0.171444	0.621	0.646	2.02507e-06
Daam1	1.1833e-10	0.118543	0.191	0.136	2.12048e-06
Rpl35a	1.18912e-10	0.0746788	0.998	0.998	2.1309e-06
Acadl	1.19657e-10	0.143898	0.565	0.485	2.14426e-06
Hif1a	1.22451e-10	-0.204156	0.271	0.32	2.19431e-06
Taf13	1.27066e-10	0.099611	0.166	0.115	2.27702e-06
Ppp1cb	1.31547e-10	0.165576	0.613	0.543	2.35732e-06
Eif2s3y	1.43274e-10	-0.148465	0.077	0.116	2.56746e-06
Nuak2	1.49454e-10	0.0607701	0.041	0.017	2.67821e-06
Wbp1l	1.64654e-10	0.11654	0.157	0.108	2.95061e-06
Elk4	1.70973e-10	0.125138	0.316	0.245	3.06384e-06
Rfc1	1.77698e-10	-0.211088	0.256	0.304	3.18435e-06
Nmi	1.7896e-10	-0.20318	0.19	0.238	3.20697e-06
Agpat3	1.81487e-10	0.118363	0.3	0.23	3.25224e-06
Ttpal	1.87887e-10	0.0782468	0.062	0.032	3.36694e-06
Cited4	1.89017e-10	-0.104755	0.034	0.062	3.38719e-06
Ciart	1.89192e-10	0.0593231	0.061	0.031	3.39032e-06
Myl12b	1.91643e-10	0.112216	0.971	0.957	3.43424e-06
Napa	1.99873e-10	0.105622	0.312	0.239	3.58172e-06
Nck1	2.06461e-10	-0.190471	0.373	0.422	3.69977e-06
Agpat5	2.06603e-10	0.135397	0.191	0.137	3.70232e-06
Tmem126a	2.12387e-10	-0.155027	0.105	0.147	3.80598e-06
Tcn2	2.1462e-10	0.111694	0.339	0.263	3.846e-06
Arhgdia	2.20172e-10	0.130086	0.696	0.619	3.94548e-06
Ppia	2.22515e-10	-0.0988984	0.996	0.995	3.98747e-06
Acvrl1	2.35644e-10	0.129449	0.841	0.778	4.22274e-06
Atp6v1g1	2.41899e-10	0.121932	0.731	0.65	4.33484e-06
Ing2	2.66053e-10	0.126348	0.254	0.191	4.76766e-06
Arid4a	2.76735e-10	-0.213261	0.364	0.407	4.95908e-06
Trib2	2.99925e-10	0.128361	0.315	0.246	5.37465e-06
Ifi35	3.02024e-10	0.138259	0.416	0.339	5.41228e-06
Epas1	3.02722e-10	0.104459	0.977	0.959	5.42478e-06
Ccdc85b	3.08413e-10	-0.147024	0.817	0.836	5.52677e-06
Ubald1	3.11083e-10	0.0983737	0.159	0.109	5.5746e-06
Mdm2	3.12046e-10	0.108782	0.173	0.121	5.59186e-06
Syf2	3.12358e-10	0.126034	0.73	0.658	5.59746e-06
Strn3	3.19227e-10	0.144993	0.566	0.486	5.72056e-06
Slc25a5	3.3242e-10	0.163737	0.677	0.611	5.95697e-06
Snrpg	3.36101e-10	-0.130337	0.774	0.785	6.02293e-06
Fam129b	3.55698e-10	-0.19613	0.188	0.234	6.37411e-06
Amer2	3.60212e-10	-0.0433585	0.002	0.013	6.45499e-06
Lhfpl2	3.64687e-10	-0.188471	0.186	0.235	6.53518e-06
Cfl1	3.68102e-10	0.0975079	0.925	0.904	6.59638e-06
Zfp937	3.72671e-10	-0.0740439	0.018	0.04	6.67826e-06
Ccdc88a	3.78243e-10	0.168764	0.314	0.249	6.77811e-06
Rab14	3.92495e-10	-0.167121	0.732	0.744	7.03351e-06
Cfap20	4.01955e-10	-0.179186	0.159	0.206	7.20304e-06
Sltm	4.38159e-10	0.125499	0.38	0.305	7.85182e-06
Eif4a1	5.20259e-10	0.14174	0.574	0.496	9.32304e-06
Ppp4r1	5.2223e-10	0.086752	0.13	0.085	9.35835e-06
Ankrd13a	5.52738e-10	0.114442	0.385	0.308	9.90507e-06
Fbxo7	6.15519e-10	0.104507	0.151	0.104	1.10301e-05
Arpc4	6.22048e-10	0.126718	0.49	0.414	1.11471e-05
Dennd6a	6.22098e-10	-0.180424	0.251	0.299	1.1148e-05
Lama4	6.38778e-10	-0.158204	0.12	0.163	1.14469e-05
Sorbs2	7.04393e-10	-0.157254	0.719	0.734	1.26227e-05
Cthrc1	7.08746e-10	-0.185028	0.084	0.122	1.27007e-05
Thsd1	7.09959e-10	-0.205933	0.333	0.379	1.27225e-05
Rpl36a-ps1	7.77221e-10	0.0733263	0.068	0.037	1.39278e-05
Enpp2	7.86921e-10	0.120854	0.183	0.132	1.41016e-05
Zranb2	8.39222e-10	-0.196476	0.318	0.363	1.50389e-05
Inpp1	8.60523e-10	0.127151	0.258	0.197	1.54206e-05
Slc35f5	8.63656e-10	0.0849112	0.143	0.096	1.54767e-05
Abcg1	8.65941e-10	0.0971274	0.154	0.106	1.55177e-05
Gbp4	8.81343e-10	-0.174057	0.081	0.118	1.57937e-05
Unc5b	9.35082e-10	-0.187477	0.11	0.15	1.67567e-05
Zcchc7	9.39471e-10	-0.174158	0.274	0.323	1.68353e-05
Sem1	9.47815e-10	-0.125578	0.874	0.879	1.69848e-05
Stk40	9.65251e-10	0.0895613	0.144	0.098	1.72973e-05
Ick	9.76799e-10	0.123872	0.36	0.287	1.75042e-05
Nek7	9.97194e-10	0.131697	0.425	0.348	1.78697e-05
Zcchc14	1.07386e-09	0.110821	0.16	0.112	1.92436e-05
Slfn5	1.13547e-09	0.156832	0.76	0.704	2.03477e-05
Arpc1a	1.15501e-09	0.119638	0.461	0.381	2.06978e-05
D8Ertd738e	1.17464e-09	0.127547	0.768	0.696	2.10496e-05
Rgl1	1.1831e-09	-0.203655	0.267	0.311	2.12011e-05
Lactb	1.22605e-09	0.102374	0.307	0.24	2.19707e-05
Cdk17	1.24253e-09	0.124909	0.322	0.254	2.22661e-05
Arl4a	1.26128e-09	-0.145346	0.965	0.968	2.26022e-05
Hprt	1.27463e-09	-0.162539	0.614	0.637	2.28414e-05
Pcnx	1.2886e-09	0.137822	0.319	0.255	2.30917e-05
Ddhd2	1.3654e-09	-0.165174	0.11	0.15	2.4468e-05
Ctps	1.36559e-09	0.0992101	0.098	0.061	2.44713e-05
Ifit3b	1.39344e-09	-0.13209	0.048	0.079	2.49704e-05
Arhgap31	1.39711e-09	-0.11757	0.851	0.853	2.50363e-05
Tmem184b	1.41241e-09	0.13281	0.394	0.324	2.53104e-05
Tpd52l1	1.41334e-09	-0.179484	0.156	0.2	2.53271e-05
Ube2d3	1.48289e-09	0.124344	0.695	0.615	2.65733e-05
Gna11	1.49674e-09	-0.182791	0.548	0.572	2.68216e-05
Kctd12b	1.5188e-09	-0.234656	0.203	0.246	2.72169e-05
Polr3k	1.55109e-09	-0.165591	0.112	0.152	2.77956e-05
Lamtor4	1.61626e-09	-0.180866	0.286	0.331	2.89634e-05
Acacb	1.64736e-09	0.0970572	0.119	0.078	2.95206e-05
Dennd4a	1.66206e-09	0.0874257	0.08	0.047	2.97841e-05
Tjp2	1.71907e-09	-0.199402	0.241	0.285	3.08057e-05
Acox1	1.72336e-09	0.12912	0.309	0.246	3.08825e-05
Tada2a	1.79878e-09	-0.13574	0.063	0.097	3.22342e-05
D5Ertd579e	1.88647e-09	0.103955	0.178	0.127	3.38055e-05
Yrdc	1.92116e-09	0.0841892	0.188	0.135	3.44272e-05
Tnfrsf10b	1.97955e-09	0.0752309	0.072	0.041	3.54735e-05
Pex3	2.01286e-09	-0.171719	0.145	0.189	3.60704e-05
Lipe	2.03525e-09	0.112237	0.234	0.177	3.64717e-05
Esyt2	2.10323e-09	-0.146347	0.768	0.773	3.76899e-05
Pgrmc1	2.15596e-09	0.122646	0.502	0.422	3.86349e-05
Ap2a2	2.2341e-09	-0.209501	0.364	0.4	4.00351e-05
Elf1	2.29735e-09	-0.192845	0.37	0.411	4.11685e-05
Thoc7	2.30359e-09	-0.190553	0.322	0.366	4.12803e-05
Rpn2	2.33364e-09	0.11623	0.414	0.339	4.18189e-05
Usp50	2.45114e-09	-0.0851228	0.027	0.052	4.39244e-05
Tbxa2r	2.45115e-09	-0.132986	0.044	0.073	4.39246e-05
Sarnp	2.49107e-09	-0.19199	0.461	0.489	4.464e-05
1700084E18Rik	2.52274e-09	0.0592758	0.038	0.016	4.52075e-05
Megf6	2.57563e-09	0.122079	0.173	0.124	4.61552e-05
Mboat1	2.64559e-09	-0.112276	0.043	0.072	4.74089e-05
Coa6	2.72945e-09	-0.151039	0.095	0.134	4.89117e-05
Dynlt3	2.74116e-09	0.121891	0.495	0.416	4.91216e-05
Plekhg1	2.77013e-09	0.135853	0.403	0.329	4.96407e-05
Swt1	2.95115e-09	-0.18987	0.267	0.314	5.28846e-05
Ppfibp1	2.97122e-09	0.141127	0.658	0.588	5.32442e-05
Coro2a	2.97315e-09	0.0606914	0.042	0.019	5.32789e-05
Lamtor2	3.02265e-09	-0.163672	0.479	0.507	5.41659e-05
Bicd2	3.16914e-09	0.112166	0.228	0.172	5.67909e-05
Rpl41	3.18217e-09	-0.0715253	0.999	0.999	5.70245e-05
Hyal2	3.33916e-09	0.117837	0.186	0.137	5.98378e-05
Tead4	3.60529e-09	0.0866861	0.101	0.064	6.46068e-05
Dusp8	3.61349e-09	0.0828002	0.143	0.098	6.47537e-05
Spaar	3.80586e-09	-0.188903	0.142	0.185	6.8201e-05
Fubp1	3.85245e-09	-0.185139	0.383	0.425	6.90359e-05
Hnrnpl	3.9652e-09	-0.188057	0.373	0.415	7.10564e-05
Zfp503	4.05036e-09	-0.153288	0.063	0.095	7.25825e-05
Lrrc59	4.14248e-09	0.0897345	0.157	0.11	7.42333e-05
Bhlhb9	4.22844e-09	0.092995	0.134	0.091	7.57737e-05
Gimap8	4.58873e-09	0.1043	0.183	0.133	8.223e-05
A030001D20Rik	4.59525e-09	0.0620635	0.06	0.032	8.23468e-05
Paqr7	4.66472e-09	0.127909	0.298	0.236	8.35917e-05
Rhog	4.67012e-09	0.0998328	0.231	0.173	8.36886e-05
Srsf5	4.79738e-09	0.144137	0.725	0.668	8.59691e-05
Wsb2	4.98811e-09	0.0963007	0.172	0.123	8.9387e-05
Tor1aip1	4.99035e-09	0.11431	0.429	0.355	8.94271e-05
Usp46	5.08981e-09	0.121693	0.382	0.313	9.12094e-05
Ndufv3	5.09232e-09	-0.18078	0.457	0.492	9.12543e-05
Lonp2	5.39115e-09	-0.19105	0.178	0.221	9.66095e-05
Ccnd1	5.47718e-09	0.142796	0.175	0.127	9.81511e-05
Pmepa1	6.36848e-09	0.137577	0.59	0.518	0.000114123
Lrrc8c	6.4262e-09	0.109999	0.48	0.402	0.000115157
Becn1	6.51002e-09	0.106197	0.274	0.213	0.000116659
Cdc42ep2	6.51482e-09	0.0764536	0.078	0.047	0.000116746
Ndufs2	6.55894e-09	0.112457	0.351	0.283	0.000117536
Dop1a	6.57112e-09	0.12591	0.311	0.248	0.000117754
Midn	6.71763e-09	0.103684	0.333	0.263	0.00012038
Slc50a1	6.74395e-09	-0.170525	0.591	0.612	0.000120852
Mrpl33	6.82127e-09	-0.184271	0.471	0.501	0.000122237
Chst15	7.21954e-09	0.0732443	0.088	0.054	0.000129374
Eif3e	7.58538e-09	0.123891	0.641	0.574	0.00013593
Pgrmc2	7.66418e-09	-0.169906	0.228	0.273	0.000137342
Rasl10a	7.99164e-09	0.051682	0.025	0.008	0.00014321
H2afz	8.13886e-09	-0.149172	0.721	0.732	0.000145848
Nampt	8.16264e-09	-0.213635	0.386	0.422	0.000146274
Fkbp3	8.31951e-09	-0.183858	0.451	0.482	0.000149086
Rras	8.40327e-09	0.124178	0.759	0.688	0.000150587
Ppp5c	8.54651e-09	0.100823	0.196	0.145	0.000153153
Ica1l	8.55193e-09	0.0775104	0.055	0.029	0.000153251
Cbr1	8.60476e-09	-0.162729	0.159	0.2	0.000154197
Tef	8.61493e-09	0.0843023	0.091	0.057	0.00015438
Pnkd	8.65828e-09	-0.177465	0.428	0.462	0.000155156
Pdcd11	8.71029e-09	-0.15152	0.136	0.178	0.000156088
Gimap4	8.79905e-09	0.0688806	0.042	0.02	0.000157679
Sox17	8.86252e-09	-0.139637	0.663	0.686	0.000158816
Arhgef15	9.59776e-09	-0.187528	0.268	0.308	0.000171992
Smpdl3a	9.63449e-09	0.117903	0.556	0.474	0.00017265
Cyb5r3	9.68452e-09	0.111984	0.446	0.37	0.000173547
Lsm7	1.0039e-08	-0.197724	0.194	0.234	0.000179898
Setx	1.01471e-08	0.136041	0.233	0.18	0.000181836
Trak1	1.02871e-08	0.0836979	0.176	0.127	0.000184345
Serpinb6a	1.03949e-08	0.123135	0.58	0.5	0.000186276
Tes	1.09778e-08	0.0884225	0.169	0.123	0.000196722
Mettl26	1.1079e-08	-0.161398	0.104	0.141	0.000198536
Gpx1	1.14853e-08	0.153342	0.684	0.632	0.000205817
Nfic	1.15013e-08	-0.146087	0.541	0.579	0.000206104
Amotl1	1.15068e-08	0.114958	0.289	0.228	0.000206201
Fmnl2	1.15146e-08	0.0938362	0.152	0.108	0.000206342
Lrch1	1.17916e-08	0.122978	0.266	0.209	0.000211305
2310022B05Rik	1.19819e-08	-0.187679	0.186	0.226	0.000214716
Srrm1	1.21575e-08	-0.18367	0.59	0.61	0.000217862
Myo10	1.23829e-08	0.133769	0.704	0.632	0.000221902
Bahcc1	1.24311e-08	-0.107921	0.036	0.062	0.000222765
Dnttip1	1.29304e-08	0.0797179	0.201	0.149	0.000231713
Slc30a9	1.3156e-08	0.100028	0.195	0.144	0.000235755
Calu	1.32058e-08	0.102774	0.366	0.295	0.000236647
Prkd3	1.32211e-08	0.105706	0.353	0.287	0.000236922
Setdb1	1.34825e-08	-0.119936	0.059	0.09	0.000241606
Babam2	1.35766e-08	0.105532	0.209	0.158	0.000243292
Ino80c	1.36689e-08	0.0753855	0.103	0.067	0.000244948
Hmgb2	1.41988e-08	0.155601	0.573	0.507	0.000254443
Tpr	1.43447e-08	-0.152104	0.608	0.648	0.000257057
Rassf8	1.49121e-08	-0.140306	0.093	0.129	0.000267224
Atp5a1	1.51305e-08	0.114111	0.675	0.602	0.000271138
Rpl22	1.55868e-08	0.086216	0.977	0.969	0.000279315
Dnm3	1.60816e-08	-0.165533	0.507	0.538	0.000288183
Dut	1.74775e-08	-0.108587	0.062	0.093	0.000313197
Xiap	1.79754e-08	0.100778	0.516	0.442	0.000322119
Plekha3	1.89082e-08	0.100635	0.207	0.156	0.000338835
Hist1h2bc	1.91558e-08	-0.224379	0.38	0.418	0.000343271
Qk	1.93604e-08	-0.122738	0.892	0.897	0.000346938
Rmnd5a	1.97113e-08	0.0889805	0.231	0.176	0.000353227
Afdn	1.98012e-08	-0.136096	0.711	0.733	0.000354838
Hnrnpul2	1.9829e-08	0.105668	0.334	0.27	0.000355335
Dpysl2	2.00529e-08	-0.183458	0.322	0.36	0.000359349
Rrp1	2.18398e-08	0.112957	0.543	0.47	0.00039137
Rpa3	2.2072e-08	-0.164345	0.127	0.165	0.000395529
Preb	2.2555e-08	0.0888914	0.161	0.116	0.000404185
Ddrgk1	2.26411e-08	0.115529	0.589	0.514	0.000405729
Bcl9	2.28817e-08	-0.0920318	0.023	0.044	0.000410041
Mospd1	2.34261e-08	-0.179758	0.262	0.304	0.000419796
Kif5b	2.42614e-08	0.104221	0.84	0.789	0.000434765
Htra3	2.43877e-08	0.0868339	0.082	0.051	0.000437028
Gm34455	2.45083e-08	-0.18126	0.111	0.149	0.000439189
Golph3l	2.48844e-08	-0.138235	0.1	0.136	0.000445928
Leprot	2.50511e-08	0.132692	0.46	0.39	0.000448915
Anp32b	2.59799e-08	0.0989207	0.55	0.47	0.00046556
Zfp292	2.5985e-08	-0.18069	0.275	0.319	0.000465652
Oip5os1	2.61561e-08	0.117472	0.638	0.562	0.000468718
Zfp946	2.66841e-08	0.0766959	0.079	0.048	0.000478179
Rtn4	2.71374e-08	0.106658	0.524	0.441	0.000486302
Il13ra1	2.71773e-08	0.0932881	0.166	0.121	0.000487018
Clk3	2.72291e-08	0.0728912	0.129	0.089	0.000487945
Por	2.75468e-08	0.133304	0.338	0.277	0.000493639
Emcn	2.80389e-08	0.105308	0.953	0.923	0.000502457
Arhgap29	2.866e-08	-0.130532	0.763	0.77	0.000513588
Uba2	2.97581e-08	0.0919969	0.336	0.267	0.000533265
Ezh1	3.10303e-08	-0.170207	0.3	0.343	0.000556063
Cyb561	3.12143e-08	0.0728728	0.09	0.057	0.00055936
Grap	3.19834e-08	0.115223	0.652	0.578	0.000573142
Sox4	3.3222e-08	-0.162291	0.077	0.11	0.000595338
Use1	3.33447e-08	0.0982304	0.394	0.322	0.000597537
Rflnb	3.3684e-08	0.105515	0.568	0.487	0.000603618
Kdm3a	3.50214e-08	0.105772	0.165	0.12	0.000627583
Srpr	3.7488e-08	0.097791	0.646	0.573	0.000671785
Thoc1	3.95398e-08	-0.168171	0.193	0.234	0.000708552
Wdr76	4.04775e-08	-0.107634	0.032	0.055	0.000725357
Ctsd	4.04783e-08	0.110441	0.473	0.397	0.000725371
Tmed9	4.0654e-08	0.0940116	0.69	0.614	0.000728521
Cox5a	4.3173e-08	0.123658	0.812	0.761	0.00077366
Ctcf	4.31766e-08	-0.168891	0.453	0.48	0.000773724
Ddx18	4.37923e-08	-0.183587	0.242	0.284	0.000784759
Gclm	4.45579e-08	-0.18154	0.415	0.445	0.000798477
Atp6v0e	4.54997e-08	0.111322	0.667	0.595	0.000815354
Stx5a	4.55065e-08	0.0754562	0.271	0.211	0.000815476
Taok1	4.60977e-08	0.107274	0.412	0.341	0.00082607
Tpgs2	4.67166e-08	-0.152592	0.132	0.17	0.000837162
Mlf2	4.87218e-08	0.110769	0.412	0.342	0.000873094
Gm16046	4.87611e-08	-0.168598	0.122	0.158	0.0008738
Cd3eap	5.15829e-08	0.0809186	0.109	0.073	0.000924365
H13	5.2203e-08	0.0757505	0.219	0.167	0.000935477
Stat3	5.30007e-08	0.103336	0.316	0.254	0.000949773
Oaz2	5.32964e-08	0.106501	0.283	0.226	0.000955071
Cbfb	5.47179e-08	0.0863899	0.134	0.095	0.000980544
Pcmtd1	5.4749e-08	-0.135452	0.762	0.775	0.000981103
Msi2	5.62752e-08	0.106493	0.596	0.523	0.00100845
Pigyl	5.68762e-08	-0.164578	0.129	0.165	0.00101922
Sf3b5	5.88332e-08	-0.161486	0.308	0.348	0.00105429
Trappc6b	6.12894e-08	0.0927324	0.511	0.429	0.00109831
Fbxo25	6.35308e-08	-0.114521	0.058	0.086	0.00113847
Rhbdf1	6.39241e-08	0.0802633	0.086	0.054	0.00114552
Tgs1	6.42315e-08	-0.165297	0.184	0.225	0.00115103
Tcea1	6.49736e-08	-0.143305	0.541	0.565	0.00116433
Parp14	6.63635e-08	-0.202279	0.171	0.209	0.00118923
Fzd6	6.6675e-08	-0.184213	0.445	0.469	0.00119482
Atp6ap1	6.8e-08	0.101622	0.315	0.255	0.00121856
Cbx8	6.99518e-08	-0.081019	0.022	0.042	0.00125354
Rheb	6.99623e-08	0.111917	0.669	0.603	0.00125372
Dnajc3	7.01818e-08	0.126687	0.632	0.56	0.00125766
Cmtm6	7.07815e-08	0.090548	0.316	0.253	0.0012684
H3f3b	7.16025e-08	0.0719317	0.995	0.996	0.00128312
Cisd2	7.18406e-08	0.0895285	0.378	0.308	0.00128738
Far2	7.25229e-08	-0.146761	0.13	0.167	0.00129961
Lpcat3	7.54957e-08	0.0822131	0.27	0.21	0.00135288
Rab31	7.7332e-08	0.0883531	0.109	0.074	0.00138579
Mxd1	7.89793e-08	0.0608859	0.09	0.058	0.00141531
Ube2g2	7.93361e-08	0.0921889	0.188	0.142	0.0014217
Nsun6	7.93675e-08	-0.154272	0.147	0.186	0.00142227
Coq10b	8.29473e-08	0.0851961	0.301	0.238	0.00148642
Dnmt1	8.64962e-08	-0.148386	0.108	0.144	0.00155001
Sugt1	8.65812e-08	-0.152777	0.461	0.482	0.00155153
Sdcbp	8.68731e-08	0.115169	0.594	0.52	0.00155677
Hopx	8.77208e-08	0.0377424	0.016	0.004	0.00157196
Hey1	8.80357e-08	-0.208825	0.125	0.16	0.0015776
Rab6a	8.94201e-08	0.0991315	0.445	0.376	0.00160241
Glul	8.97258e-08	-0.27784	0.777	0.765	0.00160789
Itga3	9.02101e-08	0.0680368	0.065	0.038	0.00161656
Tprn	9.09246e-08	0.0650193	0.062	0.036	0.00162937
Denr	9.15429e-08	-0.182148	0.333	0.367	0.00164045
Sirt7	9.18836e-08	-0.177147	0.165	0.203	0.00164655
Bex3	9.22715e-08	0.13215	0.287	0.23	0.00165351
Ensa	9.27836e-08	0.113805	0.369	0.303	0.00166268
Ptpn21	9.34512e-08	0.0714624	0.11	0.074	0.00167465
Bnip3	9.45893e-08	0.13333	0.362	0.299	0.00169504
Efnb1	9.57728e-08	0.116531	0.169	0.126	0.00171625
5430405H02Rik	9.71135e-08	-0.112918	0.049	0.076	0.00174027
Dcun1d3	9.83174e-08	0.106979	0.242	0.189	0.00176185
Gm49097	1.01282e-07	-0.0593351	0.009	0.023	0.00181497
Gm35572	1.02054e-07	0.0761444	0.127	0.089	0.00182881
Arid1a	1.0547e-07	-0.183641	0.247	0.284	0.00189002
Arl6ip5	1.05544e-07	-0.144034	0.643	0.663	0.00189135
Csnk1g2	1.06935e-07	0.104568	0.387	0.323	0.00191627
Utp14b	1.10412e-07	-0.12423	0.059	0.088	0.00197859
Rac1	1.12887e-07	0.0829712	0.772	0.712	0.00202294
Wdr43	1.13398e-07	-0.16421	0.201	0.241	0.0020321
Bcar1	1.13611e-07	0.103239	0.143	0.104	0.00203591
Ywhaz	1.17052e-07	0.102188	0.761	0.715	0.00209757
Mtrex	1.22055e-07	-0.158418	0.162	0.198	0.00218723
Otud7b	1.22897e-07	0.0754667	0.228	0.175	0.00220232
Msh3	1.2363e-07	-0.125084	0.069	0.099	0.00221545
Rpap3	1.23763e-07	-0.147177	0.102	0.136	0.00221783
Emc10	1.25466e-07	0.0968242	0.37	0.307	0.00224836
Kyat1	1.26924e-07	0.0511776	0.04	0.019	0.00227448
Sgf29	1.27764e-07	0.0818635	0.112	0.077	0.00228953
Cfap97	1.28398e-07	-0.16337	0.108	0.142	0.0023009
Aff4	1.31316e-07	0.105343	0.434	0.365	0.00235319
Lage3	1.32236e-07	-0.155176	0.183	0.221	0.00236967
Prkag1	1.33732e-07	0.0897333	0.237	0.184	0.00239649
Fus	1.34477e-07	-0.145449	0.577	0.593	0.00240983
E230001N04Rik	1.36639e-07	0.0534361	0.027	0.01	0.00244856
Ube2d2a	1.40839e-07	0.099549	0.444	0.373	0.00252384
Baiap2	1.41289e-07	0.102283	0.4	0.334	0.0025319
Ppid	1.45325e-07	-0.163425	0.246	0.285	0.00260423
Reep5	1.49064e-07	0.103871	0.48	0.407	0.00267122
Srek1	1.50988e-07	-0.170946	0.223	0.262	0.0027057
Map1b	1.52088e-07	0.0857351	0.146	0.106	0.00272542
Vsig2	1.56202e-07	0.0759921	0.139	0.099	0.00279914
Ubn1	1.56447e-07	0.105421	0.432	0.364	0.00280353
Hba-a1	1.56736e-07	-1.23014	0.006	0.018	0.00280871
Sh3bp5	1.61977e-07	0.0852307	0.154	0.113	0.00290264
Slc16a9	1.69594e-07	0.114611	0.439	0.372	0.00303912
Ahsa1	1.79239e-07	-0.147782	0.195	0.235	0.00321196
Capn2	1.84684e-07	0.0988867	0.491	0.412	0.00330954
Zscan26	1.86559e-07	-0.188488	0.228	0.264	0.00334313
Hpcal1	1.91886e-07	0.108998	0.353	0.291	0.00343859
Timeless	1.94925e-07	0.0709309	0.103	0.069	0.00349306
Ppm1a	1.96945e-07	0.0806867	0.305	0.244	0.00352926
Tcp1	2.00992e-07	0.0916124	0.296	0.235	0.00360178
Pde5a	2.01109e-07	0.0613295	0.09	0.058	0.00360388
Rsad2	2.05073e-07	-0.211718	0.251	0.292	0.00367491
Marveld2	2.08231e-07	0.0623529	0.07	0.043	0.00373151
Ap2m1	2.1604e-07	0.10716	0.429	0.357	0.00387143
Trappc5	2.18089e-07	0.0863208	0.26	0.206	0.00390815
Cramp1l	2.21526e-07	0.0908992	0.173	0.13	0.00396974
Hypk	2.22326e-07	-0.167691	0.383	0.414	0.00398407
Apmap	2.31482e-07	0.0826232	0.133	0.095	0.00414816
Hnrnpa3	2.33433e-07	0.110107	0.778	0.726	0.00418312
Tecrl	2.36111e-07	0.0595969	0.087	0.056	0.0042311
Btbd8	2.39645e-07	-0.0847503	0.022	0.041	0.00429443
Ilrun	2.39676e-07	0.0820617	0.273	0.216	0.00429499
Fam102a	2.41437e-07	-0.0635859	0.017	0.035	0.00432655
Gm49417	2.46098e-07	0.0730684	0.075	0.047	0.00441007
Ppp1r13l	2.47202e-07	0.0351964	0.02	0.006	0.00442987
Flt1	2.49205e-07	0.0655079	1	1	0.00446576
Rps21	2.56745e-07	-0.0658199	0.997	0.999	0.00460088
Ctdspl2	2.56846e-07	-0.169952	0.196	0.233	0.00460269
Pkn2	2.59604e-07	-0.154078	0.51	0.535	0.0046521
Vamp3	2.65379e-07	0.112209	0.567	0.495	0.00475559
Zfp36	2.66234e-07	-0.260155	0.742	0.73	0.00477091
Serpinb6b	2.68565e-07	0.0955578	0.325	0.266	0.00481269
Gm32352	2.72682e-07	0.0422902	0.022	0.008	0.00488646
Slc25a30	2.76504e-07	0.0757178	0.115	0.08	0.00495496
Edf1	2.83279e-07	-0.124178	0.758	0.755	0.00507636
Bcr	2.94743e-07	0.0666633	0.1	0.068	0.0052818
Tmem161b	2.95117e-07	-0.117316	0.069	0.098	0.00528851
Ube2s	2.96124e-07	0.0978197	0.509	0.435	0.00530655
Sars	3.04028e-07	-0.159097	0.29	0.326	0.00544818
Pdcd4	3.07046e-07	0.129578	0.339	0.282	0.00550227
Pik3c2a	3.15683e-07	-0.163597	0.468	0.494	0.00565704
Stmn2	3.24068e-07	-0.190238	0.041	0.065	0.0058073
Strbp	3.2754e-07	-0.12561	0.084	0.115	0.00586952
Lpar4	3.46653e-07	-0.11693	0.053	0.079	0.00621202
St6galnac4	3.47013e-07	0.0925119	0.137	0.099	0.00621847
1810009A15Rik	3.47517e-07	-0.0493912	0.016	0.032	0.0062275
Txndc12	3.57245e-07	0.0952811	0.28	0.226	0.00640183
Rab5c	3.61067e-07	0.101769	0.536	0.46	0.00647032
Dnajb5	3.74828e-07	0.0638038	0.094	0.062	0.00671692
Prss23	3.75663e-07	0.152783	0.433	0.374	0.00673188
Ptprm	3.88581e-07	0.0953895	0.445	0.376	0.00696338
Col4a3bp	3.91449e-07	-0.129675	0.739	0.75	0.00701476
Psd3	3.96406e-07	0.0875852	0.153	0.113	0.0071036
Otulin	4.09446e-07	-0.162667	0.165	0.202	0.00733727
Rbm25	4.13366e-07	-0.147127	0.507	0.536	0.00740751
Itpripl2	4.16713e-07	0.0983303	0.339	0.28	0.0074675
Ei24	4.23077e-07	0.0892734	0.296	0.239	0.00758153
Psme1	4.27492e-07	-0.149778	0.659	0.67	0.00766066
B4galt5	4.28341e-07	0.0702068	0.075	0.047	0.00767587
Snw1	4.364e-07	-0.165116	0.353	0.387	0.00782029
Ppic	4.36567e-07	0.0846321	0.286	0.228	0.00782328
Eif4a2	4.40461e-07	0.0946284	0.641	0.565	0.00789306
Nuak1	4.4209e-07	-0.065277	0.014	0.03	0.00792225
Sox13	4.43643e-07	-0.138604	0.138	0.174	0.00795007
Twsg1	4.51814e-07	0.0738047	0.128	0.091	0.00809651
5930430L01Rik	4.67754e-07	-0.0746917	0.022	0.041	0.00838216
Jmjd1c	4.69953e-07	-0.172252	0.363	0.394	0.00842156
Traf7	4.77063e-07	0.0783394	0.16	0.119	0.00854898
Clk4	4.7746e-07	-0.160383	0.226	0.262	0.00855608
Tacc1	4.84824e-07	0.0953273	0.562	0.488	0.00868804
Fkbp9	4.90064e-07	0.08256	0.238	0.187	0.00878194
Isyna1	4.91574e-07	-0.131154	0.569	0.597	0.00880901
Zeb1	4.99341e-07	0.100862	0.388	0.327	0.00894819
Nbl1	5.19549e-07	0.0671474	0.05	0.028	0.00931033
Tspan17	5.38694e-07	0.0757341	0.235	0.184	0.0096534
Dab2ip	5.55963e-07	0.110169	0.773	0.728	0.00996285
Fam189a2	5.744e-07	-0.098975	0.043	0.066	0.0102933
Dync1li2	5.87883e-07	0.067966	0.343	0.28	0.0105349
Wsb1	5.88104e-07	0.0893784	0.236	0.187	0.0105388
Fam76a	5.91571e-07	0.110129	0.479	0.413	0.010601
Zfp512	6.04199e-07	0.0913633	0.133	0.097	0.0108272
Stra6	6.17857e-07	0.12276	0.369	0.311	0.011072
Gm9889	6.1993e-07	0.0539112	0.076	0.048	0.0111091
Them6	6.28751e-07	-0.0881434	0.043	0.067	0.0112672
Pole4	6.32009e-07	0.0831512	0.208	0.163	0.0113256
Slfn2	6.36899e-07	-0.159788	0.111	0.143	0.0114132
Lysmd2	6.59149e-07	0.0835033	0.31	0.252	0.0118119
D430040D24Rik	6.6524e-07	0.0531087	0.052	0.03	0.0119211
Gm26917	6.69196e-07	-0.0998391	0.074	0.103	0.011992
Ubqln1	6.7816e-07	0.0829667	0.206	0.161	0.0121526
Gpr85	6.83358e-07	0.0610204	0.117	0.082	0.0122458
Tgfbr2	6.97069e-07	-0.160335	0.524	0.543	0.0124915
Ier5	6.99037e-07	-0.175989	0.446	0.473	0.0125267
Prdm1	7.09183e-07	0.0754515	0.112	0.079	0.0127086
Dctn6	7.13703e-07	-0.177047	0.324	0.355	0.0127896
Lrpap1	7.14802e-07	0.0923829	0.415	0.35	0.0128093
Snapc1	7.17147e-07	-0.161745	0.184	0.22	0.0128513
Rbm22	7.22622e-07	-0.154984	0.344	0.378	0.0129494
Zfp422	7.27858e-07	0.0877209	0.266	0.213	0.0130432
Syncrip	7.44651e-07	0.0898908	0.241	0.191	0.0133441
Timm44	7.44958e-07	-0.138944	0.125	0.158	0.0133496
Derl1	7.52291e-07	0.0907062	0.25	0.199	0.0134811
Hddc2	7.53842e-07	-0.126266	0.066	0.093	0.0135089
Cct4	7.55122e-07	0.0952303	0.519	0.447	0.0135318
Cmpk2	7.62796e-07	-0.160404	0.124	0.157	0.0136693
Mrps14	7.66251e-07	-0.152984	0.441	0.463	0.0137312
Arrdc2	7.83834e-07	0.0505658	0.055	0.032	0.0140463
Ppp1r12c	8.06446e-07	0.0809043	0.236	0.187	0.0144515
Cstb	8.09722e-07	0.111931	0.477	0.405	0.0145102
Cpq	8.12123e-07	0.0546932	0.079	0.051	0.0145532
Chek2	8.21997e-07	-0.123753	0.076	0.105	0.0147302
Vps37b	8.31157e-07	-0.156515	0.127	0.16	0.0148943
Usp3	8.44772e-07	-0.126075	0.13	0.166	0.0151383
Dhx40	8.47339e-07	0.0912104	0.307	0.25	0.0151843
Rxylt1	8.48737e-07	-0.143539	0.166	0.202	0.0152094
Cnih1	8.51955e-07	0.081174	0.271	0.218	0.015267
Cox20	8.59662e-07	-0.15949	0.208	0.244	0.0154051
Bbc3	8.64106e-07	0.0623031	0.11	0.077	0.0154848
Klf6	8.69514e-07	-0.180841	0.861	0.857	0.0155817
Cnn2	8.71694e-07	0.0972649	0.278	0.226	0.0156208
Dnaja4	8.90781e-07	0.0741145	0.137	0.1	0.0159628
Il15	8.9555e-07	0.0661275	0.08	0.052	0.0160483
Ctbp2	8.96075e-07	-0.144224	0.244	0.281	0.0160577
Phf14	9.17658e-07	-0.171287	0.289	0.326	0.0164444
Zcchc24	9.34227e-07	0.0639501	0.078	0.051	0.0167413
Cript	9.44086e-07	0.086146	0.449	0.379	0.016918
Nid2	9.44657e-07	0.0630161	0.127	0.091	0.0169283
Dok4	9.50907e-07	-0.138807	0.112	0.144	0.0170403
Cmpk1	9.76655e-07	0.0974537	0.458	0.389	0.0175017
Cltb	1.00298e-06	0.101115	0.599	0.531	0.0179733
Dync1h1	1.00638e-06	0.0956754	0.556	0.487	0.0180342
Jag2	1.01579e-06	0.105528	0.454	0.387	0.0182029
Slc16a4	1.03175e-06	-0.162635	0.49	0.506	0.018489
Akirin1	1.05004e-06	0.073764	0.264	0.211	0.0188168
Tmtc2	1.07558e-06	0.106244	0.473	0.404	0.0192744
2610300M13Rik	1.10297e-06	-0.0610514	0.014	0.029	0.0197652
Txn1	1.10899e-06	-0.103247	0.755	0.759	0.0198732
Pnp	1.10981e-06	0.113471	0.544	0.481	0.0198879
Micall2	1.11138e-06	0.0436094	0.042	0.022	0.019916
Baz2b	1.11357e-06	0.110675	0.426	0.365	0.0199551
Pea15a	1.13529e-06	0.0983471	0.476	0.412	0.0203444
Mndal	1.17257e-06	-0.180137	0.064	0.091	0.0210125
Usp7	1.1763e-06	0.0989123	0.3	0.248	0.0210792
Serpinb1a	1.19492e-06	-0.0512178	0.014	0.028	0.0214129
Tmtc1	1.23576e-06	0.0743212	0.207	0.162	0.0221448
Aldh4a1	1.23959e-06	-0.116042	0.078	0.106	0.0222134
Ubxn1	1.25526e-06	0.0925205	0.655	0.589	0.0224943
Metap2	1.26711e-06	-0.155255	0.573	0.586	0.0227067
Ndufa5	1.28688e-06	-0.139648	0.549	0.561	0.0230609
Thbd	1.29657e-06	-0.189185	0.372	0.403	0.0232345
Pradc1	1.29751e-06	-0.106796	0.062	0.088	0.0232514
9530068E07Rik	1.31803e-06	0.0756744	0.194	0.151	0.0236191
Kat14	1.32556e-06	-0.100241	0.06	0.086	0.0237541
Dennd2c	1.33154e-06	-0.0447321	0.013	0.028	0.0238612
Mrfap1	1.35514e-06	0.106077	0.715	0.654	0.0242841
Fkrp	1.3557e-06	0.0562853	0.111	0.078	0.0242942
Adi1	1.37229e-06	-0.0855108	0.036	0.057	0.0245914
Nhsl1	1.39991e-06	-0.159002	0.205	0.239	0.0250864
Ndst1	1.44201e-06	0.0712667	0.134	0.098	0.0258408
Ifi203	1.44675e-06	-0.131165	0.072	0.1	0.0259258
Tmpo	1.45773e-06	-0.170475	0.339	0.366	0.0261226
Colca2	1.46345e-06	-0.070805	0.033	0.054	0.026225
Romo1	1.46757e-06	-0.147544	0.444	0.474	0.0262988
Mpc1	1.47129e-06	0.0878244	0.517	0.442	0.0263655
Mtln	1.50674e-06	-0.157909	0.219	0.255	0.0270007
Rtraf	1.50685e-06	0.0838205	0.593	0.521	0.0270028
Usp36	1.51109e-06	0.06904	0.119	0.086	0.0270787
Ppp1r15b	1.51528e-06	0.0737202	0.142	0.105	0.0271539
Arhgap17	1.53093e-06	-0.156721	0.297	0.331	0.0274343
Fkbp1a	1.54946e-06	0.101727	0.753	0.702	0.0277663
Saysd1	1.57941e-06	0.072789	0.272	0.216	0.028303
Lyn	1.60547e-06	-0.176732	0.248	0.28	0.02877
Mrps21	1.60571e-06	-0.134238	0.483	0.506	0.0287743
Hip1	1.61047e-06	-0.122688	0.619	0.637	0.0288596
Cfh	1.61368e-06	0.0653089	0.232	0.184	0.0289171
Acbd3	1.61775e-06	0.0729267	0.366	0.302	0.02899
Mapre1	1.62255e-06	0.0996543	0.551	0.486	0.0290761
Kcnq1	1.62282e-06	0.0480636	0.048	0.027	0.029081
Lmbrd1	1.63982e-06	0.0868998	0.463	0.394	0.0293856
Pogz	1.64872e-06	-0.101345	0.066	0.092	0.029545
Dars	1.66581e-06	-0.108272	0.074	0.102	0.0298513
Layn	1.66596e-06	-0.157387	0.347	0.377	0.0298539
Map3k3	1.68112e-06	0.0751496	0.189	0.146	0.0301256
Rbck1	1.6836e-06	0.0832544	0.233	0.185	0.0301701
Ccdc97	1.70826e-06	0.0556369	0.089	0.06	0.030612
Cep83	1.71355e-06	0.0849982	0.187	0.145	0.0307068
Sumo2	1.73636e-06	-0.102699	0.843	0.842	0.0311155
Tex10	1.77516e-06	-0.127567	0.086	0.115	0.0318108
Rab43	1.77683e-06	0.0701312	0.1	0.07	0.0318408
Fbxw2	1.77875e-06	0.0950919	0.413	0.349	0.0318752
Zbtb20	1.7831e-06	0.0937605	0.866	0.823	0.0319531
Sh3bp4	1.78337e-06	0.0888608	0.29	0.237	0.0319581
Mapk1	1.79313e-06	0.0817815	0.353	0.294	0.0321329
Nfe2l1	1.80815e-06	-0.148504	0.568	0.583	0.0324021
Fcgrt	1.81738e-06	0.0991498	0.858	0.821	0.0325674
Mmadhc	1.8286e-06	0.0665583	0.144	0.107	0.0327685
Spred1	1.83845e-06	0.0727093	0.134	0.098	0.032945
Col4a1	1.8838e-06	0.102029	0.815	0.772	0.0337577
Rnf169	1.90146e-06	0.0725722	0.134	0.098	0.0340742
Rpl10-ps3	1.91672e-06	0.0543603	0.104	0.073	0.0343477
Per2	1.91737e-06	0.0310031	0.019	0.007	0.0343593
Cdk11b	1.94661e-06	-0.147126	0.453	0.476	0.0348833
Dnah2os	1.95869e-06	0.0525474	0.074	0.048	0.0350997
Ccdc102a	1.96754e-06	-0.0919097	0.059	0.085	0.0352583
Colgalt2	2.00483e-06	-0.107076	0.085	0.113	0.0359265
Hsbp1	2.00552e-06	0.0924954	0.568	0.491	0.0359389
Dync1li1	2.01384e-06	0.0918269	0.289	0.236	0.0360879
AW011738	2.03871e-06	-0.0866208	0.035	0.056	0.0365336
Ripply3	2.05062e-06	-0.112813	0.052	0.077	0.0367471
Prkar1a	2.07974e-06	0.0883487	0.793	0.731	0.0372689
Nab1	2.1101e-06	0.0715055	0.234	0.186	0.0378129
Zfp329	2.11314e-06	-0.145156	0.134	0.167	0.0378674
Ankmy2	2.1665e-06	-0.100935	0.064	0.09	0.0388237
E2f5	2.21457e-06	-0.123587	0.099	0.129	0.0396852
Ncbp2	2.26501e-06	-0.127266	0.106	0.137	0.0405891
Adamts13	2.27011e-06	0.020932	0.008	0.001	0.0406803
Rab11a	2.27173e-06	0.0918672	0.663	0.603	0.0407094
Ptprk	2.29799e-06	0.0716636	0.162	0.122	0.04118
Fars2	2.36282e-06	0.0629308	0.085	0.058	0.0423417
Stat5b	2.3803e-06	0.0742567	0.108	0.078	0.042655
Gadd45b	2.38135e-06	-0.202865	0.128	0.158	0.0426739
Uimc1	2.45978e-06	-0.145291	0.164	0.197	0.0440793
Fosl2	2.46899e-06	0.0634674	0.17	0.129	0.0442443
Ing4	2.47498e-06	0.0755525	0.167	0.128	0.0443516
Ubc	2.52189e-06	-0.0915726	0.962	0.963	0.0451922
Slk	2.57644e-06	0.103069	0.448	0.39	0.0461698
Erich1	2.61632e-06	-0.160271	0.139	0.17	0.0468845
Fbh1	2.62601e-06	0.0735147	0.093	0.064	0.0470581
Cyth3	2.63369e-06	0.120164	0.579	0.517	0.0471958
Hmgb1	2.63467e-06	-0.0747562	0.961	0.963	0.0472133
Rab8b	2.68825e-06	-0.133571	0.112	0.143	0.0481734
Adamts1	2.70956e-06	-0.35739	0.415	0.437	0.0485553
Galnt1	2.7452e-06	0.0623529	0.263	0.211	0.0491939
Xaf1	2.76427e-06	-0.166389	0.343	0.375	0.0495357
Prkce	2.76984e-06	0.0830257	0.123	0.09	0.0496355
Gapdh	2.78453e-06	0.0873541	0.803	0.748	0.0498987
Podxl	2.7916e-06	-0.119532	0.705	0.711	0.0500255
Klhl4	2.81484e-06	0.0826611	0.158	0.121	0.050442
Kank2	2.82382e-06	-0.101545	0.068	0.095	0.0506029
Dhx36	2.83073e-06	-0.154223	0.331	0.366	0.0507266
Trim8	2.8394e-06	-0.144818	0.189	0.223	0.050882
Gtf2i	2.87666e-06	-0.143232	0.408	0.435	0.0515497
Ndufv1	2.8848e-06	0.0644416	0.354	0.291	0.0516957
Myo1b	2.90885e-06	0.0887406	0.334	0.279	0.0521267
Fam133b	2.91715e-06	-0.173436	0.256	0.291	0.0522753
Mmd	2.95449e-06	0.0719166	0.165	0.125	0.0529445
Nkd1	3.00641e-06	-0.15933	0.532	0.547	0.0538749
Pros1	3.03543e-06	0.0832721	0.307	0.253	0.0543949
Zzz3	3.03854e-06	-0.166132	0.21	0.241	0.0544506
Car5a	3.06705e-06	0.105968	0.424	0.368	0.0549615
Dpp9	3.09775e-06	0.055098	0.145	0.108	0.0555118
Oma1	3.11216e-06	-0.125783	0.091	0.12	0.05577
Amot	3.12869e-06	-0.132509	0.104	0.133	0.0560661
Tgtp2	3.15218e-06	-0.073291	0.025	0.043	0.056487
Tgtp1	3.1565e-06	-0.0652805	0.014	0.029	0.0565644
Akr1a1	3.1655e-06	0.0855209	0.799	0.739	0.0567258
Stag2	3.18456e-06	0.0922401	0.366	0.308	0.0570673
Ahr	3.22107e-06	-0.0654197	0.017	0.032	0.0577216
Srsf6	3.27377e-06	0.077559	0.196	0.153	0.0586659
Sos1	3.27546e-06	0.102818	0.482	0.419	0.0586963
Cipc	3.31304e-06	0.0576722	0.118	0.085	0.0593697
Klhl25	3.31854e-06	-0.0595395	0.022	0.038	0.0594683
Gna13	3.42707e-06	0.0764594	0.27	0.219	0.061413
Gtf3c3	3.46349e-06	-0.101581	0.063	0.088	0.0620657
Smc2	3.49495e-06	-0.137262	0.073	0.099	0.0626295
Hipk2	3.50876e-06	0.063084	0.129	0.095	0.0628769
Fgfr1op	3.55644e-06	-0.0687876	0.029	0.047	0.0637314
Nrarp	3.59013e-06	0.0555097	0.085	0.058	0.0643352
Canx	3.60295e-06	0.0940763	0.552	0.481	0.0645649
Itsn2	3.63075e-06	0.0775696	0.36	0.303	0.065063
S100a11	3.67418e-06	-0.194642	0.393	0.417	0.0658413
Cd38	3.69633e-06	0.0516714	0.075	0.05	0.0662383
Ndufc2	3.71815e-06	0.120608	0.709	0.661	0.0666293
Mark4	3.73187e-06	0.0463195	0.111	0.079	0.066875
Yju2	3.8058e-06	0.0658728	0.09	0.062	0.0681999
Zswim4	3.81336e-06	0.0415044	0.037	0.02	0.0683354
Txnl4a	3.85411e-06	0.0549572	0.209	0.163	0.0690656
Camsap2	3.88064e-06	0.087206	0.225	0.182	0.069541
Gnl2	3.98217e-06	0.0758391	0.125	0.092	0.0713606
Rps27	4.15181e-06	-0.0549216	0.997	0.997	0.0744004
Maf1	4.15799e-06	0.0818944	0.223	0.179	0.0745112
Tgfb1	4.21779e-06	0.0855207	0.32	0.267	0.0755827
Mrps36	4.2595e-06	-0.143635	0.169	0.201	0.0763303
Ifi27	4.28545e-06	0.0984506	0.721	0.669	0.0767953
Rhebl1	4.37298e-06	0.0532854	0.048	0.028	0.0783639
Ctbp1	4.40019e-06	0.0742937	0.399	0.338	0.0788515
Rph3al	4.41411e-06	0.0548072	0.053	0.032	0.0791009
Cit	4.42456e-06	-0.0535239	0.011	0.023	0.079288
Hist3h2ba	4.48972e-06	-0.0432865	0.009	0.02	0.0804558
Tnfsf13	4.57254e-06	0.0758231	0.272	0.222	0.08194
Hadh	4.57577e-06	-0.147598	0.303	0.334	0.0819979
Psen2	4.64161e-06	0.0817001	0.141	0.107	0.0831777
Mgll	4.68804e-06	0.115412	0.645	0.581	0.0840096
Slc30a1	4.7343e-06	0.109403	0.732	0.682	0.0848387
1110038B12Rik	4.76428e-06	-0.108449	0.073	0.099	0.0853759
Lsm4	4.7643e-06	0.0734116	0.318	0.263	0.0853762
Tada2b	4.82387e-06	0.072549	0.137	0.103	0.0864437
Srgap2	4.85275e-06	-0.114323	0.611	0.627	0.0869612
Cdkn1c	4.86494e-06	-0.223129	0.378	0.408	0.0871798
Ccdc82	4.87513e-06	-0.166004	0.269	0.299	0.0873624
Atf4	4.90994e-06	0.0750308	0.485	0.418	0.0879862
Mex3b	4.95739e-06	-0.0495534	0.015	0.029	0.0888364
Plxna4	5.00939e-06	0.0630716	0.048	0.029	0.0897683
Smarca4	5.02299e-06	0.0740689	0.296	0.244	0.0900119
Ier5l	5.0439e-06	-0.206715	0.226	0.258	0.0903866
Mtfr1l	5.08881e-06	0.0705806	0.282	0.23	0.0911915
Tmem248	5.17629e-06	0.0647618	0.132	0.099	0.0927591
Zfp326	5.18822e-06	-0.161843	0.275	0.304	0.0929729
Crispld1	5.19421e-06	-0.117128	0.081	0.108	0.0930803
Mertk	5.2133e-06	-0.123414	0.091	0.119	0.0934223
Relb	5.34016e-06	0.0581182	0.108	0.078	0.0956957
Morf4l2	5.35189e-06	0.0755682	0.316	0.261	0.0959059
Tax1bp1	5.37056e-06	0.100263	0.712	0.659	0.0962405
Lmntd1	5.38455e-06	-0.103062	0.078	0.105	0.0964912
Rnf215	5.44768e-06	0.0811794	0.338	0.282	0.0976223
Uqcrh	5.47853e-06	0.0753139	0.88	0.846	0.0981752
Cuta	5.48946e-06	-0.154812	0.395	0.42	0.0983711
Tuba1b	5.55354e-06	-0.113053	0.752	0.75	0.0995194
Cep295	5.56649e-06	-0.143977	0.089	0.117	0.0997516
Nmt2	5.61481e-06	-0.140291	0.165	0.198	0.100617
Myef2	5.69066e-06	-0.153138	0.14	0.17	0.101977
Yipf4	5.70206e-06	0.0851475	0.462	0.395	0.102181
Morf4l1	5.74594e-06	-0.0799306	0.918	0.92	0.102967
Gm4070	5.76509e-06	-0.120452	0.092	0.119	0.10331
Hnrnpd	5.79906e-06	0.0820363	0.495	0.435	0.103919
Tet1	5.99457e-06	-0.0603795	0.019	0.034	0.107423
Cox7c	6.00463e-06	-0.0843903	0.904	0.906	0.107603
Gm6277	6.00633e-06	0.0351457	0.016	0.005	0.107633
Trim21	6.00663e-06	-0.0701135	0.028	0.045	0.107639
Snap23	6.27108e-06	0.0739208	0.273	0.222	0.112378
Lemd2	6.46577e-06	0.0570529	0.169	0.13	0.115867
Zfp462	6.53226e-06	-0.0590431	0.011	0.024	0.117058
Tsnax	6.59695e-06	0.063469	0.262	0.212	0.118217
Nudc	6.60663e-06	0.0819213	0.538	0.47	0.118391
Mgat2	6.65661e-06	0.072661	0.269	0.22	0.119286
Kif1c	6.69098e-06	0.0486615	0.295	0.239	0.119902
Limch1	6.72853e-06	0.09275	0.622	0.554	0.120575
Cdan1	6.77051e-06	-0.0699213	0.031	0.05	0.121328
Ptn	6.8179e-06	-0.116478	0.912	0.915	0.122177
Stk24	6.92659e-06	-0.16	0.222	0.252	0.124125
Il6ra	7.08689e-06	-0.139167	0.133	0.163	0.126997
Dnajc10	7.10049e-06	0.103005	0.414	0.358	0.127241
Carnmt1	7.1561e-06	-0.11799	0.1	0.128	0.128237
Thap3	7.24901e-06	-0.156152	0.191	0.222	0.129902
Ndfip1	7.25595e-06	0.0882087	0.74	0.69	0.130027
Rap1a	7.32232e-06	0.0866598	0.784	0.733	0.131216
Setd3	7.41189e-06	0.0781686	0.303	0.251	0.132821
Myh10	7.54236e-06	0.0952769	0.226	0.182	0.135159
Plpp3	7.56062e-06	-0.0942317	0.058	0.082	0.135486
Pawr	7.69251e-06	0.0402714	0.035	0.019	0.13785
Map1lc3b	7.76932e-06	0.0831443	0.813	0.757	0.139226
Eef1d	8.13348e-06	0.0866418	0.65	0.595	0.145752
Mtcl1	8.18217e-06	0.0322535	0.017	0.006	0.146624
Foxo1	8.21373e-06	-0.148485	0.344	0.374	0.14719
Amer1	8.28504e-06	-0.0988149	0.043	0.064	0.148468
Rnf14	8.39099e-06	0.0565768	0.206	0.161	0.150366
1110038F14Rik	8.46938e-06	-0.161211	0.285	0.314	0.151771
Tshz1	8.48673e-06	-0.172424	0.244	0.274	0.152082
Mmp15	8.52663e-06	-0.116973	0.086	0.113	0.152797
Bik	8.80176e-06	0.0392083	0.038	0.021	0.157728
Slc25a40	8.812e-06	-0.0933322	0.058	0.081	0.157911
Cep95	8.89586e-06	-0.049078	0.013	0.026	0.159414
Nr4a3	9.01379e-06	0.036247	0.024	0.011	0.161527
Npm1	9.04669e-06	0.0804191	0.778	0.73	0.162117
Zfp971	9.09359e-06	-0.0474928	0.016	0.03	0.162957
Kcnab1	9.20096e-06	0.0255849	0.013	0.004	0.164881
Mmp25	9.23535e-06	0.03811	0.074	0.049	0.165497
Sppl3	9.35313e-06	0.0539223	0.131	0.098	0.167608
Hba-a2	9.38547e-06	-0.958731	0.005	0.013	0.168188
Ext2	9.53498e-06	0.067666	0.233	0.187	0.170867
Amfr	9.55985e-06	0.0646939	0.249	0.202	0.171313
Galk1	9.70755e-06	-0.108418	0.075	0.101	0.173959
Dmwd	9.75036e-06	0.0735436	0.179	0.141	0.174726
Psap	9.79051e-06	0.0904482	0.656	0.598	0.175446
Klhl36	9.92082e-06	-0.0628235	0.021	0.037	0.177781
Eng	1.00289e-05	0.0766206	0.911	0.886	0.179718
Ptpn11	1.00614e-05	0.0823852	0.314	0.263	0.180301
Fxyd5	1.01326e-05	0.0813551	0.863	0.824	0.181576
Zfp330	1.01538e-05	0.0671561	0.207	0.164	0.181955
Setdb2	1.01573e-05	-0.0661042	0.022	0.038	0.18202
Lypd1	1.03024e-05	-0.058229	0.009	0.021	0.184619
Arl6ip1	1.04513e-05	-0.109907	0.681	0.686	0.187288
Dolk	1.04714e-05	0.0430032	0.081	0.056	0.187648
Smim26	1.05336e-05	-0.127608	0.241	0.273	0.188762
Commd3	1.05842e-05	-0.143942	0.262	0.293	0.189669
Pam	1.06714e-05	0.0874577	0.349	0.296	0.191232
Gstm1	1.06914e-05	0.0790619	0.634	0.568	0.191589
A930005H10Rik	1.06953e-05	0.0582478	0.087	0.061	0.19166
Irgm1	1.07043e-05	-0.150916	0.117	0.145	0.191821
Gkap1	1.09787e-05	-0.165102	0.29	0.32	0.196739
Ist1	1.11774e-05	-0.15335	0.229	0.259	0.2003
Nxpe2	1.12546e-05	-0.105115	0.057	0.08	0.201682
Wdr70	1.12779e-05	-0.138067	0.173	0.204	0.2021
Mcfd2	1.14403e-05	0.0687812	0.231	0.187	0.205011
Yes1	1.1563e-05	0.0730117	0.264	0.217	0.207209
Scgb3a1	1.16323e-05	0.0545978	0.122	0.091	0.208451
Selenon	1.1755e-05	0.0502061	0.099	0.071	0.21065
Prorsd1	1.18408e-05	-0.129874	0.107	0.136	0.212188
Adm	1.18826e-05	0.0750494	0.171	0.134	0.212936
Ubxn6	1.20522e-05	0.0351853	0.289	0.235	0.215976
Egflam	1.21707e-05	0.0496041	0.055	0.034	0.218099
Trim30a	1.25205e-05	-0.144764	0.175	0.205	0.224368
Nckap5l	1.25289e-05	0.0532875	0.084	0.058	0.224518
Spry4	1.26865e-05	0.0439928	0.056	0.035	0.227341
Hmgn2	1.28804e-05	-0.135355	0.14	0.17	0.230816
Atp5g2	1.28996e-05	-0.111472	0.793	0.786	0.231161
Magi3	1.29586e-05	0.0796413	0.336	0.281	0.232218
Inafm1	1.31125e-05	0.0648386	0.149	0.115	0.234976
Cep162	1.31726e-05	-0.0916099	0.05	0.071	0.236052
Atp1b3	1.33288e-05	0.0768906	0.423	0.367	0.238852
Zcchc9	1.33643e-05	-0.13896	0.173	0.203	0.239488
Cd320	1.34921e-05	0.0921928	0.503	0.442	0.241778
Hlf	1.35107e-05	0.0520506	0.164	0.128	0.242111
Cables2	1.35115e-05	-0.0928317	0.06	0.083	0.242127
Acvr2a	1.37088e-05	-0.0901752	0.06	0.083	0.245662
Dgcr2	1.39546e-05	0.0604589	0.147	0.113	0.250067
Tmem87b	1.40238e-05	0.0547207	0.201	0.159	0.251307
Epn1	1.45206e-05	0.0702427	0.245	0.201	0.260209
Tmem218	1.45473e-05	0.0514017	0.128	0.095	0.260687
Hcfc1	1.45966e-05	0.0525992	0.175	0.137	0.261571
Cnot4	1.47274e-05	-0.148171	0.241	0.272	0.263914
Tardbp	1.48324e-05	-0.146069	0.25	0.28	0.265797
Tcea3	1.49437e-05	-0.0959942	0.044	0.064	0.267791
Ubac2	1.49568e-05	0.0425553	0.135	0.101	0.268026
Atpif1	1.50351e-05	-0.160922	0.355	0.38	0.269428
Ssb	1.5165e-05	-0.121952	0.653	0.65	0.271757
Ppp1r35	1.52055e-05	-0.140057	0.134	0.163	0.272483
Faf2	1.52433e-05	0.0658022	0.222	0.179	0.27316
Hist3h2a	1.52986e-05	-0.143783	0.125	0.154	0.274151
G2e3	1.53237e-05	-0.110254	0.085	0.112	0.2746
Stxbp1	1.54387e-05	0.071078	0.202	0.161	0.276662
Dhcr24	1.55044e-05	-0.0792884	0.05	0.071	0.27784
Pnpla8	1.55078e-05	0.0702754	0.351	0.296	0.277899
Ssx2ip	1.5556e-05	0.0810914	0.267	0.222	0.278763
Gpbp1l1	1.55631e-05	-0.134067	0.244	0.275	0.27889
Tm9sf3	1.57877e-05	0.0713297	0.631	0.559	0.282916
Dctpp1	1.58597e-05	-0.110206	0.067	0.09	0.284206
Psmb8	1.5932e-05	-0.15456	0.437	0.457	0.285502
Rce1	1.59626e-05	0.0515653	0.163	0.126	0.28605
Mtch1	1.61571e-05	0.072864	0.456	0.396	0.289536
Sbds	1.6184e-05	0.0780873	0.588	0.527	0.290018
Tcf7	1.64267e-05	-0.142324	0.263	0.294	0.294367
Rab11fip5	1.65443e-05	-0.112269	0.074	0.099	0.296474
Aco2	1.65771e-05	0.061435	0.332	0.276	0.297061
Hilpda	1.66683e-05	0.054528	0.105	0.077	0.298696
Pstk	1.67797e-05	-0.0986431	0.07	0.095	0.300691
Bms1	1.70653e-05	-0.131706	0.163	0.194	0.305811
Slain2	1.72014e-05	-0.162805	0.332	0.354	0.308249
Smap1	1.73487e-05	-0.144125	0.633	0.625	0.310889
Cdk2ap1	1.73928e-05	0.0699304	0.324	0.272	0.311679
Emc9	1.79145e-05	-0.113753	0.069	0.092	0.321027
Inpp5f	1.79203e-05	-0.148138	0.246	0.276	0.321132
Rcor1	1.79883e-05	-0.146351	0.152	0.181	0.322351
2310009A05Rik	1.83383e-05	-0.148776	0.153	0.182	0.328622
Hhex	1.83433e-05	-0.156961	0.14	0.168	0.328712
Cmtm8	1.84531e-05	-0.109409	0.713	0.721	0.330679
Dhrs7	1.85632e-05	-0.131591	0.307	0.336	0.332653
Fam102b	1.86745e-05	0.0412008	0.051	0.032	0.334648
Ccdc34	1.87778e-05	-0.123941	0.102	0.129	0.336499
Sacs	1.88479e-05	-0.121203	0.063	0.085	0.337755
Cd93	1.88863e-05	0.120803	0.62	0.569	0.338442
Cd9	1.89332e-05	-0.134656	0.085	0.111	0.339284
Sptlc2	1.90954e-05	-0.164176	0.282	0.307	0.342189
Cep70	1.91335e-05	-0.100255	0.073	0.097	0.342872
Patz1	1.93708e-05	-0.101596	0.096	0.123	0.347125
Atad2b	1.9422e-05	-0.136293	0.147	0.176	0.348043
Shisa5	1.96947e-05	0.0795949	0.402	0.346	0.352929
Gatm	1.98332e-05	0.0505187	0.887	0.851	0.355411
Sec63	1.98482e-05	0.0858449	0.369	0.315	0.35568
Tmem37	1.99156e-05	-0.0743943	0.033	0.051	0.356887
Gas2l1	2.01491e-05	0.0655771	0.131	0.099	0.361071
Tsix	2.0206e-05	-0.0835041	0.041	0.06	0.362091
Ppp2ca	2.05127e-05	0.0645784	0.525	0.453	0.367588
Tbc1d12	2.06278e-05	0.0587329	0.26	0.211	0.36965
Glis2	2.08052e-05	-0.0807704	0.041	0.061	0.37283
Hlcs	2.12063e-05	-0.103894	0.071	0.095	0.380017
Arhgef1	2.13172e-05	-0.139819	0.373	0.394	0.382004
Aif1l	2.1435e-05	-0.106918	0.045	0.065	0.384116
C130074G19Rik	2.15211e-05	-0.167106	0.451	0.462	0.385658
mt-Nd6	2.15258e-05	0.0719859	0.145	0.112	0.385742
Tle4	2.1542e-05	-0.148133	0.268	0.297	0.386032
Trim36	2.17596e-05	0.0337352	0.022	0.01	0.389931
A530084C06Rik	2.1765e-05	0.0387296	0.071	0.048	0.390029
Ubtd1	2.19021e-05	0.0434586	0.091	0.065	0.392486
Grk6	2.19388e-05	0.0592199	0.066	0.044	0.393143
Rnf121	2.22053e-05	0.0531388	0.114	0.085	0.39792
AU020206	2.22492e-05	-0.0728421	0.037	0.056	0.398706
Tshz2	2.24351e-05	0.0814909	0.595	0.532	0.402036
Fndc3b	2.25413e-05	0.0429628	0.133	0.1	0.40394
Urm1	2.27624e-05	0.0491966	0.18	0.141	0.407902
Numb	2.28478e-05	-0.11915	0.185	0.216	0.409433
Irf5	2.28954e-05	0.0448076	0.056	0.036	0.410285
Bckdha	2.30693e-05	0.0567894	0.118	0.089	0.413401
Ly6e	2.32683e-05	0.0482891	0.991	0.982	0.416968
Msmo1	2.37888e-05	0.0756044	0.194	0.156	0.426295
Fbrs	2.38093e-05	0.053433	0.123	0.093	0.426662
Usp22	2.41883e-05	0.0546331	0.162	0.126	0.433454
Srsf2	2.42458e-05	-0.133202	0.551	0.562	0.434485
Dtx3l	2.4445e-05	-0.107543	0.099	0.125	0.438054
Noct	2.44932e-05	0.0830292	0.157	0.124	0.438919
Dtd2	2.45825e-05	-0.111222	0.082	0.107	0.440518
Mettl9	2.49993e-05	0.0601637	0.337	0.283	0.447987
Pkig	2.5085e-05	0.100959	0.502	0.449	0.449524
Clec1a	2.51494e-05	0.0479694	0.137	0.105	0.450677
Fbxl7	2.51725e-05	0.0731378	0.157	0.123	0.451092
Tcim	2.53415e-05	0.00416879	0.294	0.244	0.45412
Slc39a7	2.57054e-05	0.0598152	0.187	0.149	0.460642
Itprid2	2.59636e-05	-0.148714	0.164	0.191	0.465268
Atp5md	2.62407e-05	-0.107455	0.626	0.638	0.470233
Rps26	2.64269e-05	0.0622657	0.971	0.956	0.47357
Rps27rt	2.66848e-05	0.0739483	0.257	0.211	0.478192
Prr12	2.67413e-05	-0.0980195	0.071	0.094	0.479205
Ptpn1	2.67628e-05	0.0737279	0.244	0.202	0.47959
Klf16	2.70282e-05	0.0458156	0.064	0.043	0.484346
Hcar1	2.71646e-05	-0.0195043	0.002	0.009	0.486789
Dleu7	2.73311e-05	-0.0189919	0.001	0.007	0.489774
Anapc16	2.74588e-05	0.0674445	0.399	0.344	0.492062
Eif3k	2.76744e-05	0.103052	0.69	0.638	0.495924
Fam126b	2.79234e-05	-0.134045	0.125	0.153	0.500386
Cdk9	2.79446e-05	0.0580082	0.262	0.216	0.500768
Clcn4	2.79602e-05	0.0516751	0.246	0.199	0.501046
Isoc2b	2.79885e-05	-0.0242703	0.003	0.011	0.501553
Mylip	2.82832e-05	-0.0736913	0.046	0.066	0.506834
AI837181	2.83285e-05	0.0608741	0.174	0.137	0.507647
Wdr6	2.83378e-05	-0.0671806	0.027	0.043	0.507813
Rasl11a	2.84546e-05	-0.0314152	0.005	0.013	0.509906
Jmjd6	2.84743e-05	0.0566709	0.251	0.205	0.510259
Lgals9	2.85588e-05	0.0800537	0.389	0.335	0.511774
Slc16a2	2.85947e-05	-0.135552	0.564	0.578	0.512417
Riok3	2.89982e-05	0.068292	0.368	0.312	0.519649
Nras	2.90781e-05	0.0607333	0.337	0.281	0.52108
Pced1b	2.93746e-05	-0.039515	0.013	0.025	0.526392
Psmb9	2.95023e-05	-0.137297	0.256	0.284	0.528682
Mgat4b	2.9562e-05	0.0465399	0.173	0.135	0.529751
C130032M10Rik	3.01932e-05	-0.0139541	0	0.004	0.541062
Senp5	3.02551e-05	-0.142716	0.169	0.198	0.542171
Tmbim4	3.04642e-05	0.0706616	0.459	0.398	0.545919
Selenoh	3.07072e-05	-0.131362	0.197	0.225	0.550272
Slc44a5	3.07342e-05	0.0367928	0.025	0.012	0.550757
Rab4a	3.11438e-05	0.0692626	0.207	0.167	0.558097
Il1r1	3.11492e-05	0.0504913	0.086	0.061	0.558193
Usp15	3.11871e-05	-0.141327	0.201	0.229	0.558873
Plekhm1	3.11941e-05	0.05459	0.13	0.099	0.558999
Creb3	3.12362e-05	0.0552923	0.151	0.117	0.559753
Sdha	3.14414e-05	0.079959	0.364	0.311	0.563431
Rif1	3.16394e-05	-0.15863	0.174	0.203	0.566978
2900060B14Rik	3.17498e-05	-0.126182	0.092	0.118	0.568957
Arl8a	3.18633e-05	0.0511604	0.17	0.133	0.57099
Rcbtb1	3.19067e-05	0.0642788	0.193	0.154	0.571768
Ubr4	3.1966e-05	0.0539093	0.277	0.228	0.572832
Cd274	3.20085e-05	-0.0858352	0.042	0.061	0.573593
Slco1c1	3.20602e-05	0.0624283	0.98	0.97	0.574518
Fra10ac1	3.21056e-05	-0.123008	0.115	0.142	0.575333
Gnb4	3.2166e-05	0.0832488	0.38	0.327	0.576414
Hdgfl3	3.31567e-05	-0.126911	0.143	0.172	0.594169
Mapk14	3.32685e-05	-0.103663	0.105	0.132	0.596172
Dnm1l	3.36229e-05	-0.131595	0.25	0.28	0.602523
Mrpl17	3.3676e-05	-0.140773	0.265	0.291	0.603475
Ccdc184	3.37719e-05	-0.0652447	0.011	0.021	0.605192
Arl1	3.38264e-05	0.0780108	0.57	0.505	0.606169
Etnk1	3.40403e-05	0.0851471	0.416	0.359	0.610001
Cpt2	3.44549e-05	0.0430476	0.104	0.076	0.617432
Tmed4	3.45332e-05	0.0719683	0.353	0.3	0.618834
Myo1d	3.45749e-05	0.0768524	0.267	0.221	0.619582
Laptm4b	3.55868e-05	-0.108952	0.08	0.104	0.637715
0610009B22Rik	3.56335e-05	-0.124592	0.112	0.138	0.638552
Ckap4	3.57815e-05	0.0513213	0.176	0.139	0.641205
Supt5	3.59681e-05	-0.141201	0.227	0.256	0.644548
Ruvbl1	3.60007e-05	0.056817	0.208	0.168	0.645133
Synrg	3.62018e-05	-0.146217	0.255	0.283	0.648736
Tgfb1i1	3.63949e-05	0.0624051	0.176	0.139	0.652196
Ncapd2	3.66417e-05	-0.0442561	0.009	0.019	0.656619
Gt(ROSA)26Sor	3.69848e-05	0.0394647	0.192	0.151	0.662768
Mppe1	3.71363e-05	-0.0565678	0.033	0.051	0.665482
Plekhf2	3.73805e-05	0.0570752	0.227	0.185	0.669859
Paxbp1	3.75001e-05	-0.127613	0.152	0.18	0.672001
Eif3d	3.76965e-05	0.0772545	0.338	0.286	0.675521
Ywhab	3.77247e-05	-0.107805	0.728	0.732	0.676027
Camk2n2	3.78536e-05	0.0462958	0.035	0.02	0.678337
Oga	3.81076e-05	0.0734455	0.296	0.248	0.682889
Smad9	3.82226e-05	-0.0318018	0.007	0.016	0.684949
Msantd3	3.86279e-05	0.0598191	0.112	0.084	0.692212
Stk25	3.86754e-05	0.0700012	0.244	0.202	0.693064
Limk1	3.88714e-05	0.0440224	0.044	0.027	0.696576
Aplp1	3.90213e-05	0.0329832	0.047	0.029	0.699262
Slu7	3.94473e-05	0.0609126	0.236	0.194	0.706896
Cars	3.95406e-05	0.0360186	0.054	0.035	0.708567
Cyp2u1	4.02118e-05	-0.0232486	0.003	0.01	0.720595
Pomp	4.02327e-05	0.0650273	0.927	0.903	0.72097
Hexb	4.07591e-05	0.0680928	0.135	0.104	0.730403
Gm48727	4.09971e-05	0.0165783	0.008	0.001	0.734669
Eif2b2	4.10835e-05	0.0512936	0.147	0.114	0.736217
Tmem204	4.1222e-05	0.0860082	0.75	0.703	0.738698
Rnf4	4.13103e-05	0.0715656	0.171	0.136	0.740281
Kpnb1	4.15542e-05	0.0628114	0.223	0.183	0.744651
Dynlt1f	4.15898e-05	-0.0763567	0.044	0.063	0.74529
Pvr	4.1845e-05	0.0443207	0.129	0.098	0.749862
Pdxdc1	4.23874e-05	0.0626781	0.232	0.189	0.759583
Dock1	4.28551e-05	0.0668879	0.325	0.275	0.767963
Nrp2	4.35664e-05	0.0762553	0.149	0.117	0.780709
Psme3	4.39063e-05	0.0618383	0.094	0.069	0.786801
Ppp1r15a	4.41572e-05	-0.222415	0.358	0.375	0.791296
Ufm1	4.4178e-05	0.0494957	0.282	0.232	0.79167
Cdk16	4.49511e-05	0.0634577	0.141	0.11	0.805523
Nadk	4.5209e-05	-0.120927	0.168	0.197	0.810145
Irf6	4.52856e-05	-0.047013	0.012	0.023	0.811519
Tdp2	4.53724e-05	0.0641159	0.129	0.1	0.813074
Mllt6	4.58683e-05	0.0608784	0.171	0.136	0.821959
Tuba1c	4.58916e-05	0.0331776	0.045	0.028	0.822377
Lamc1	4.603e-05	0.0703286	0.213	0.174	0.824857
Socs1	4.6451e-05	-0.0404691	0.012	0.023	0.832403
S1pr4	4.68237e-05	0.0398649	0.14	0.108	0.839081
Ino80b	4.68398e-05	-0.152577	0.231	0.259	0.839369
Med19	4.68729e-05	-0.146065	0.212	0.238	0.839962
Cdc40	4.71034e-05	-0.129467	0.207	0.236	0.844093
Yif1b	4.78914e-05	0.0652311	0.297	0.247	0.858214
Arl15	4.81443e-05	-0.129806	0.147	0.175	0.862746
Spock2	4.82447e-05	-0.0610966	0.997	0.998	0.864545
Snrnp70	4.83173e-05	-0.12411	0.439	0.456	0.865846
Afg1l	4.85607e-05	-0.0695283	0.038	0.056	0.870209
St3gal5	4.86044e-05	0.072509	0.13	0.1	0.870991
Crtap	4.86502e-05	0.0630286	0.311	0.26	0.871812
Piezo1	4.89903e-05	0.067227	0.198	0.16	0.877906
Slc35a2	4.90869e-05	0.0613552	0.116	0.088	0.879637
Pten	4.92635e-05	0.0693529	0.363	0.305	0.882802
Snrnp48	4.96884e-05	-0.142826	0.265	0.292	0.890416
Tmem167b	4.99157e-05	0.0595717	0.126	0.097	0.89449
C2cd2l	4.99201e-05	0.0472683	0.108	0.08	0.894568
Iqcn	5.01706e-05	-0.0391762	0.011	0.022	0.899057
Zfp410	5.01709e-05	0.043649	0.083	0.059	0.899063
Mrps12	5.03122e-05	-0.141092	0.201	0.23	0.901594
Gng5	5.0986e-05	-0.0692415	0.977	0.975	0.913669
Mypop	5.10259e-05	-0.065793	0.025	0.04	0.914383
Ssh2	5.11066e-05	0.0689734	0.204	0.165	0.91583
Pdcd5	5.16766e-05	-0.13028	0.521	0.53	0.926044
4931414P19Rik	5.1943e-05	-0.0316036	0.006	0.014	0.930819
Gm10549	5.26909e-05	-0.0210779	0.001	0.006	0.94422
Slc35g2	5.29843e-05	-0.0654469	0.028	0.044	0.949478
Erp44	5.29942e-05	0.0569973	0.27	0.224	0.949656
Edem1	5.29958e-05	0.05382	0.075	0.052	0.949685
Lrrc18	5.32522e-05	-0.042755	0.01	0.021	0.95428
Xbp1	5.39842e-05	0.0738684	0.395	0.337	0.967396
Ankhd1	5.42859e-05	-0.108772	0.186	0.215	0.972804
Nrd1	5.43633e-05	-0.133885	0.414	0.433	0.974191
Lrif1	5.49972e-05	-0.142417	0.123	0.149	0.98555
Nanos1	5.55149e-05	-0.0878509	0.056	0.077	0.994828
Diablo	5.55627e-05	0.0537771	0.188	0.151	0.995684
Rcn2	5.56201e-05	0.053261	0.331	0.278	0.996712
Alkbh2	5.57109e-05	0.0439463	0.086	0.062	0.99834
Cenpx	5.59421e-05	-0.119969	0.392	0.419	1
Fam120a	5.72826e-05	0.0469709	0.287	0.238	1
Kcnq1ot1	5.77308e-05	0.060079	0.168	0.134	1
Nsa2	5.84857e-05	-0.152331	0.554	0.565	1
Fam177a	5.85774e-05	-0.0782518	0.042	0.06	1
Ube2e3	5.86512e-05	-0.13805	0.319	0.342	1
Vtn	5.89554e-05	0.0699832	0.086	0.062	1
Mpnd	5.93739e-05	0.0462857	0.118	0.089	1
D430018E03Rik	5.94536e-05	-0.0151103	0	0.004	1
Strap	5.94573e-05	0.0685478	0.412	0.353	1
Rpia	5.96459e-05	-0.0937639	0.076	0.1	1
Psmf1	5.99468e-05	0.0349563	0.103	0.076	1
Minpp1	6.0139e-05	0.0436741	0.11	0.082	1
Lamp1	6.12953e-05	0.077712	0.794	0.742	1
Mob3b	6.13601e-05	-0.10484	0.071	0.093	1
Rasal2	6.21978e-05	0.0797606	0.47	0.414	1
Axin1	6.25945e-05	0.0412363	0.072	0.05	1
Msrb3	6.2616e-05	0.0656947	0.252	0.21	1
Phf10	6.34764e-05	0.0433999	0.204	0.165	1
Atp2b1	6.36549e-05	0.0620591	0.543	0.483	1
Pgm2	6.37329e-05	0.0633208	0.18	0.145	1
Slc52a2	6.40452e-05	0.0608892	0.199	0.161	1
Ube2m	6.42105e-05	0.0669754	0.42	0.361	1
Dguok	6.45738e-05	-0.128154	0.189	0.217	1
Gpsm3	6.5183e-05	0.0417722	0.044	0.027	1
Adamtsl4	6.52635e-05	0.0556758	0.052	0.034	1
Trip10	6.57594e-05	0.0513072	0.205	0.165	1
Cacna1e	6.65698e-05	0.0495681	0.039	0.023	1
Fam219b	6.66193e-05	0.0571399	0.235	0.195	1
Marf1	6.73582e-05	-0.161052	0.208	0.232	1
Cdh2	6.77505e-05	0.0578573	0.12	0.091	1
Fam53a	6.80929e-05	0.0427294	0.124	0.094	1
Gadd45g	6.97349e-05	-0.218862	0.255	0.285	1
Eif4e3	7.00081e-05	0.0550522	0.095	0.07	1
Cdyl	7.02712e-05	-0.114458	0.09	0.114	1
Tmem115	7.07338e-05	0.0301012	0.16	0.125	1
Gm609	7.08939e-05	-0.0700083	0.027	0.042	1
Tbc1d20	7.11487e-05	0.0597808	0.256	0.213	1
Tut7	7.11489e-05	0.0867368	0.523	0.468	1
Idh3g	7.11777e-05	0.0665584	0.218	0.179	1
Cebpz	7.12831e-05	0.0669439	0.403	0.349	1
Optn	7.1511e-05	0.0496337	0.058	0.039	1
Sin3a	7.1526e-05	0.0471384	0.134	0.103	1
Rab4b	7.24538e-05	0.0665733	0.29	0.244	1
Tmed10	7.33843e-05	0.0734657	0.827	0.784	1
Nono	7.41894e-05	0.0630577	0.353	0.303	1
Gm5	7.44072e-05	0.0500603	0.051	0.034	1
Kazn	7.5163e-05	-0.0398755	0.011	0.022	1
Gm11696	7.53816e-05	0.0311272	0.023	0.012	1
Cacfd1	7.59751e-05	0.0382242	0.101	0.075	1
Prorp	7.66534e-05	0.0809561	0.162	0.129	1
Snhg3	7.68184e-05	-0.139335	0.169	0.195	1
Msl1	7.72764e-05	0.0530299	0.285	0.239	1
Necap2	7.7919e-05	0.0584854	0.314	0.264	1
mt-Nd3	7.82658e-05	0.0532066	0.812	0.748	1
Ptpn9	7.82709e-05	0.0436237	0.093	0.068	1
Snx18	7.8667e-05	0.0479061	0.155	0.122	1
Aggf1	7.87629e-05	0.0473027	0.158	0.125	1
Entpd1	7.88462e-05	-0.137202	0.231	0.258	1
Phb2	7.93208e-05	0.054241	0.345	0.292	1
Smarcad1	8.04664e-05	-0.128379	0.141	0.167	1
Dnajb12	8.07875e-05	0.0525072	0.141	0.11	1
Zfp280d	8.09673e-05	-0.141234	0.165	0.192	1
Ppat	8.10961e-05	-0.0604099	0.031	0.047	1
Nnmt	8.27559e-05	0.0170734	0.007	0.001	1
Hsp90ab1	8.34487e-05	-0.0585721	0.996	0.994	1
Stat1	8.40742e-05	-0.157965	0.239	0.265	1
Hbp1	8.45679e-05	0.0571867	0.28	0.234	1
Stk4	8.53797e-05	-0.0955916	0.052	0.072	1
Igbp1	8.59206e-05	0.0636107	0.217	0.178	1
Npc2	8.60458e-05	0.0785055	0.573	0.511	1
Vta1	8.60713e-05	0.0382096	0.212	0.172	1
Usp9x	8.6075e-05	0.0627315	0.29	0.244	1
[truncated: 15,922 more rows]
